# Supplementary material for: Breast Subtypes and Prognosis of Breast Cancer Patients With Initial Bone Metastasis: A Population-Based Study
Source: Front Oncol. 2020 Dec 2;10:580112. doi: 10.3389/fonc.2020.580112 (PMC7739957; doi:10.3389/fonc.2020.580112)
Supplement: Supplementary file 1 [file DataSheet_1.xlsx]

## Sheet: Sheet1
Age at diagnosis	Race recode (White, Black, Other)	Race recode (W, B, AI, API)	Sex	Histologic Type ICD-O-3	Grade	Breast Subtype (2010+)	ER Status Recode Breast Cancer (1990+)	PR Status Recode Breast Cancer (1990+)	Derived HER2 Recode (2010+)	Derived AJCC T, 7th ed (2010-2015)	Derived AJCC N, 7th ed (2010-2015)	Derived AJCC M, 7th ed (2010-2015)	Derived AJCC Stage Group, 7th ed (2010-2015)	Marital status at diagnosis	Insurance Recode (2007+)	SEER Combined Mets at DX-brain (2010+)	SEER Combined Mets at DX-liver (2010+)	SEER Combined Mets at DX-lung (2010+)	RX Summ--Surg Prim Site (1998+)	Vital status recode (study cutoff used)	Survival months	COD to site recode	SEER cause-specific death classification	SEER other cause of death classification
45	White	White	Female	8500	Moderately differentiated; Grade II	HR+/HER2- (Luminal A)	Positive	Negative	Negative	T2	N0	M1	IV	Married (including common law)	Insured	No	No	No	0	Dead	39	Breast	Dead (attributable to this cancer dx)	Alive or dead due to cancer
57	Black	Black	Female	8520	Moderately differentiated; Grade II	HR-/HER2- (Triple Negative)	Negative	Negative	Negative	T4b	N3a	M1	IV	Single (never married)	Any Medicaid	No	No	No	51	Alive	81	Alive	Alive or dead of other cause	Alive or dead due to cancer
68	White	White	Female	8500	Poorly differentiated; Grade III	HR+/HER2- (Luminal A)	Positive	Positive	Negative	T4d	N1	M1	IV	Married (including common law)	Insured/No specifics	No	No	No	22	Dead	10	Breast	Dead (attributable to this cancer dx)	Alive or dead due to cancer
63	Other (American Indian/AK Native, Asian/Pacific Islander)	Asian or Pacific Islander	Female	8500	Poorly differentiated; Grade III	HR+/HER2+ (Luminal B)	Positive	Negative	Positive	T1c	N3a	M1	IV	Single (never married)	Any Medicaid	No	Yes	No	50	Dead	25	Breast	Dead (attributable to this cancer dx)	Alive or dead due to cancer
56	Other (American Indian/AK Native, Asian/Pacific Islander)	Asian or Pacific Islander	Female	8520	Well differentiated; Grade I	HR+/HER2- (Luminal A)	Positive	Negative	Negative	T2	N1	M1	IV	Unknown	Insured	No	No	No	0	Dead	32	Breast	Dead (attributable to this cancer dx)	Alive or dead due to cancer
59	White	White	Female	8500	Unknown	HR+/HER2- (Luminal A)	Positive	Positive	Negative	T3	N2NOS	M1	IV	Single (never married)	Any Medicaid	No	No	Yes	0	Dead	11	Breast	Dead (attributable to this cancer dx)	Alive or dead due to cancer
43	Black	Black	Female	8500	Poorly differentiated; Grade III	HR+/HER2- (Luminal A)	Positive	Positive	Negative	T4d	N3c	M1	IV	Divorced	Any Medicaid	No	Yes	No	41	Dead	14	Diseases of Heart	Alive or dead of other cause	Dead (attributable to causes other than this cancer dx)
59	White	White	Female	8500	Poorly differentiated; Grade III	HR+/HER2+ (Luminal B)	Positive	Positive	Positive	T2	N0	M1	IV	Divorced	Insured	No	No	No	22	Alive	81	Alive	Alive or dead of other cause	Alive or dead due to cancer
50	White	White	Female	8500	Poorly differentiated; Grade III	HR+/HER2- (Luminal A)	Positive	Positive	Negative	T4c	N2a	M1	IV	Single (never married)	Any Medicaid	No	Yes	Yes	0	Dead	45	Breast	Dead (attributable to this cancer dx)	Alive or dead due to cancer
70	White	White	Female	8523	Moderately differentiated; Grade II	HR+/HER2- (Luminal A)	Positive	Negative	Negative	T4b	N1	M1	IV	Single (never married)	Insured/No specifics	No	No	No	50	Dead	27	Nephritis, Nephrotic Syndrome and Nephrosis	Alive or dead of other cause	Dead (attributable to causes other than this cancer dx)
81	White	White	Female	8520	Moderately differentiated; Grade II	HR+/HER2- (Luminal A)	Positive	Positive	Negative	T3	N0	M1	IV	Single (never married)	Insured	No	No	No	0	Alive	78	Alive	Alive or dead of other cause	Alive or dead due to cancer
40	White	White	Female	8500	Moderately differentiated; Grade II	HR+/HER2- (Luminal A)	Positive	Positive	Negative	T3	N1	M1	IV	Married (including common law)	Insured	No	No	No	0	Alive	78	Alive	Alive or dead of other cause	Alive or dead due to cancer
47	Other (American Indian/AK Native, Asian/Pacific Islander)	Asian or Pacific Islander	Female	8140	Unknown	HR+/HER2- (Luminal A)	Positive	Positive	Negative	T3	N3b	M1	IV	Divorced	Insured/No specifics	No	Yes	No	0	Dead	24	Breast	Dead (attributable to this cancer dx)	Alive or dead due to cancer
49	White	White	Female	8500	Moderately differentiated; Grade II	HR-/HER2+ (HER2 enriched)	Negative	Negative	Positive	T1c	N1	M1	IV	Separated	Insured	No	No	No	41	Alive	83	Alive	Alive or dead of other cause	Alive or dead due to cancer
75	White	White	Female	8500	Moderately differentiated; Grade II	HR+/HER2- (Luminal A)	Positive	Positive	Negative	T2	N0	M1	IV	Single (never married)	Insured	No	No	Yes	41	Dead	54	Breast	Dead (attributable to this cancer dx)	Alive or dead due to cancer
77	Other (American Indian/AK Native, Asian/Pacific Islander)	Asian or Pacific Islander	Female	8500	Moderately differentiated; Grade II	HR+/HER2- (Luminal A)	Positive	Positive	Negative	T3	N2a	M1	IV	Married (including common law)	Any Medicaid	No	No	No	0	Dead	23	Breast	Dead (attributable to this cancer dx)	Alive or dead due to cancer
38	Other (American Indian/AK Native, Asian/Pacific Islander)	Asian or Pacific Islander	Female	8013	Poorly differentiated; Grade III	HR+/HER2+ (Luminal B)	Positive	Positive	Positive	T3	N0	M1	IV	Married (including common law)	Any Medicaid	No	No	No	47	Dead	44	Breast	Dead (attributable to this cancer dx)	Alive or dead due to cancer
43	White	White	Female	8520	Moderately differentiated; Grade II	HR+/HER2- (Luminal A)	Positive	Positive	Negative	T3	N2a	M1	IV	Married (including common law)	Insured	No	No	No	40	Alive	76	Alive	Alive or dead of other cause	Alive or dead due to cancer
77	White	White	Female	8500	Moderately differentiated; Grade II	HR+/HER2+ (Luminal B)	Positive	Negative	Positive	T2	N3a	M1	IV	Divorced	Insured/No specifics	No	No	No	54	Dead	21	Breast	Dead (attributable to this cancer dx)	Alive or dead due to cancer
41	White	White	Female	8500	Poorly differentiated; Grade III	HR-/HER2+ (HER2 enriched)	Negative	Negative	Positive	T3	N3b	M1	IV	Married (including common law)	Insured	No	No	No	20	Alive	83	Alive	Alive or dead of other cause	Alive or dead due to cancer
58	Black	Black	Female	8500	Poorly differentiated; Grade III	HR+/HER2- (Luminal A)	Positive	Negative	Negative	T2	N1a	M1	IV	Single (never married)	Insured	No	No	No	22	Dead	65	Breast	Dead (attributable to this cancer dx)	Alive or dead due to cancer
64	White	White	Female	8500	Unknown	HR+/HER2- (Luminal A)	Positive	Positive	Negative	T3	N1	M1	IV	Widowed	Any Medicaid	No	No	No	0	Dead	16	Breast	Dead (attributable to this cancer dx)	Alive or dead due to cancer
49	Black	Black	Female	8520	Poorly differentiated; Grade III	HR+/HER2- (Luminal A)	Positive	Positive	Negative	T4b	N0	M1	IV	Married (including common law)	Insured	Yes	Yes	Yes	0	Dead	4	Breast	Dead (attributable to this cancer dx)	Alive or dead due to cancer
70	White	White	Female	8523	Moderately differentiated; Grade II	HR+/HER2- (Luminal A)	Positive	Positive	Negative	T3	N1	M1	IV	Single (never married)	Any Medicaid	No	No	No	23	Alive	80	Alive	Alive or dead of other cause	Alive or dead due to cancer
94	White	White	Female	8140	Unknown	HR+/HER2- (Luminal A)	Positive	Unknown	Negative	T2	N1	M1	IV	Widowed	Insured	No	No	No	0	Dead	14	Breast	Dead (attributable to this cancer dx)	Alive or dead due to cancer
37	Other (American Indian/AK Native, Asian/Pacific Islander)	Asian or Pacific Islander	Female	8500	Well differentiated; Grade I	HR+/HER2- (Luminal A)	Positive	Positive	Negative	T3	N1	M1	IV	Married (including common law)	Any Medicaid	No	No	No	0	Alive	77	Alive	Alive or dead of other cause	Alive or dead due to cancer
67	Black	Black	Male	8255	Unknown	HR+/HER2- (Luminal A)	Positive	Negative	Negative	T2	N1	M1	IV	Single (never married)	Any Medicaid	No	Yes	Yes	0	Dead	4	Breast	Dead (attributable to this cancer dx)	Alive or dead due to cancer
73	Black	Black	Female	8500	Poorly differentiated; Grade III	HR-/HER2- (Triple Negative)	Negative	Negative	Negative	T4a	N0	M1	IV	Divorced	Insured	No	No	Yes	0	Dead	18	Breast	Dead (attributable to this cancer dx)	Alive or dead due to cancer
53	Other (American Indian/AK Native, Asian/Pacific Islander)	Asian or Pacific Islander	Female	8500	Unknown	HR+/HER2- (Luminal A)	Positive	Positive	Negative	T2	N0	M1	IV	Married (including common law)	Any Medicaid	No	Yes	Yes	0	Dead	15	Breast	Dead (attributable to this cancer dx)	Alive or dead due to cancer
72	Other (American Indian/AK Native, Asian/Pacific Islander)	Asian or Pacific Islander	Female	8500	Moderately differentiated; Grade II	HR+/HER2- (Luminal A)	Positive	Positive	Negative	T2	N1mi	M1	IV	Married (including common law)	Insured	No	No	No	22	Alive	77	Alive	Alive or dead of other cause	Alive or dead due to cancer
57	Black	Black	Female	8500	Poorly differentiated; Grade III	HR+/HER2+ (Luminal B)	Positive	Positive	Positive	T4d	N1a	M1	IV	Married (including common law)	Insured	No	No	Yes	51	Dead	31	Breast	Dead (attributable to this cancer dx)	Alive or dead due to cancer
70	White	White	Female	8500	Moderately differentiated; Grade II	HR+/HER2- (Luminal A)	Positive	Positive	Negative	T3	N3a	M1	IV	Widowed	Insured/No specifics	No	No	No	22	Alive	71	Alive	Alive or dead of other cause	Alive or dead due to cancer
44	White	White	Female	8500	Poorly differentiated; Grade III	HR+/HER2+ (Luminal B)	Positive	Positive	Positive	T1c	N0(i-)	M1	IV	Married (including common law)	Insured	No	Yes	No	52	Dead	16	Breast	Dead (attributable to this cancer dx)	Alive or dead due to cancer
67	White	White	Female	8500	Poorly differentiated; Grade III	HR+/HER2- (Luminal A)	Positive	Negative	Negative	T2	N1	M1	IV	Married (including common law)	Insured	No	No	Yes	0	Dead	2	Breast	Dead (attributable to this cancer dx)	Alive or dead due to cancer
70	White	White	Female	8520	Well differentiated; Grade I	HR+/HER2- (Luminal A)	Positive	Positive	Negative	T2	N2a	M1	IV	Married (including common law)	Insured	No	No	No	41	Alive	82	Alive	Alive or dead of other cause	Alive or dead due to cancer
88	White	White	Female	8246	Moderately differentiated; Grade II	HR+/HER2- (Luminal A)	Positive	Positive	Negative	T4d	N1	M1	IV	Single (never married)	Insured/No specifics	No	Yes	No	0	Dead	9	Esophagus	Alive or dead of other cause	Dead (attributable to causes other than this cancer dx)
62	Black	Black	Female	8500	Poorly differentiated; Grade III	HR+/HER2- (Luminal A)	Positive	Positive	Negative	T2	N2NOS	M1	IV	Single (never married)	Any Medicaid	No	Yes	Yes	22	Dead	56	Breast	Dead (attributable to this cancer dx)	Alive or dead due to cancer
53	White	White	Female	8500	Poorly differentiated; Grade III	HR+/HER2+ (Luminal B)	Positive	Negative	Positive	T2	N1	M1	IV	Separated	Insured	No	Yes	No	0	Dead	15	Breast	Dead (attributable to this cancer dx)	Alive or dead due to cancer
58	White	White	Female	8523	Poorly differentiated; Grade III	HR+/HER2- (Luminal A)	Positive	Negative	Negative	T4b	N2a	M1	IV	Single (never married)	Any Medicaid	No	No	No	51	Dead	63	Breast	Dead (attributable to this cancer dx)	Alive or dead due to cancer
54	Black	Black	Female	8140	Poorly differentiated; Grade III	HR+/HER2- (Luminal A)	Negative	Positive	Negative	T4a	N0	M1	IV	Widowed	Any Medicaid	No	No	No	0	Dead	4	Chronic Liver Disease and Cirrhosis	Alive or dead of other cause	Dead (attributable to causes other than this cancer dx)
53	White	White	Female	8522	Unknown	HR-/HER2+ (HER2 enriched)	Negative	Negative	Positive	T4d	N3NOS	M1	IV	Divorced	Insured	No	No	No	0	Dead	13	Breast	Dead (attributable to this cancer dx)	Alive or dead due to cancer
80	White	White	Female	8520	Moderately differentiated; Grade II	HR+/HER2- (Luminal A)	Positive	Negative	Negative	T4b	N0	M1	IV	Widowed	Insured/No specifics	No	No	No	0	Dead	2	Breast	Dead (attributable to this cancer dx)	Alive or dead due to cancer
64	White	White	Female	8500	Moderately differentiated; Grade II	HR+/HER2- (Luminal A)	Positive	Positive	Negative	T1c	N0(i-)	M1	IV	Married (including common law)	Insured	No	No	No	22	Dead	20	Thyroid	Alive or dead of other cause	Dead (attributable to causes other than this cancer dx)
84	White	White	Female	8500	Poorly differentiated; Grade III	HR+/HER2- (Luminal A)	Positive	Negative	Negative	T2	N1	M1	IV	Unknown	Insured	Yes	No	No	0	Dead	6	Breast	Dead (attributable to this cancer dx)	Alive or dead due to cancer
67	White	White	Female	8500	Unknown	HR+/HER2- (Luminal A)	Positive	Positive	Negative	T2	N0	M1	IV	Single (never married)	Insured	No	Yes	No	0	Dead	1	Breast	Dead (attributable to this cancer dx)	Alive or dead due to cancer
41	Other (American Indian/AK Native, Asian/Pacific Islander)	Asian or Pacific Islander	Female	8500	Poorly differentiated; Grade III	HR+/HER2- (Luminal A)	Positive	Negative	Negative	T1c	N1	M1	IV	Unknown	Insured	No	No	No	52	Dead	54	Breast	Dead (attributable to this cancer dx)	Alive or dead due to cancer
49	Other (American Indian/AK Native, Asian/Pacific Islander)	Asian or Pacific Islander	Female	8500	Poorly differentiated; Grade III	HR-/HER2+ (HER2 enriched)	Negative	Negative	Positive	T1c	N2a	M1	IV	Married (including common law)	Insured	No	No	No	22	Alive	70	Alive	Alive or dead of other cause	Alive or dead due to cancer
61	White	White	Female	8140	Unknown	HR+/HER2- (Luminal A)	Positive	Positive	Negative	T2	N3b	M1	IV	Single (never married)	Any Medicaid	No	No	No	0	Dead	62	Breast	Dead (attributable to this cancer dx)	Alive or dead due to cancer
39	White	White	Female	8500	Poorly differentiated; Grade III	HR-/HER2+ (HER2 enriched)	Negative	Negative	Positive	T2	N2a	M1	IV	Married (including common law)	Insured	No	No	No	52	Alive	69	Alive	Alive or dead of other cause	Alive or dead due to cancer
69	White	White	Female	8520	Moderately differentiated; Grade II	HR+/HER2- (Luminal A)	Positive	Positive	Negative	T3	N3a	M1	IV	Married (including common law)	Insured	No	No	No	41	Dead	51	Breast	Dead (attributable to this cancer dx)	Alive or dead due to cancer
50	White	White	Female	8522	Well differentiated; Grade I	HR+/HER2- (Luminal A)	Positive	Positive	Negative	T1c	N1	M1	IV	Married (including common law)	Insured	No	Yes	No	0	Dead	45	Breast	Dead (attributable to this cancer dx)	Alive or dead due to cancer
55	White	White	Female	8500	Moderately differentiated; Grade II	HR+/HER2- (Luminal A)	Positive	Positive	Negative	T4c	N3c	M1	IV	Married (including common law)	Any Medicaid	Yes	Yes	No	0	Dead	23	Breast	Dead (attributable to this cancer dx)	Alive or dead due to cancer
57	White	White	Female	8523	Moderately differentiated; Grade II	HR+/HER2- (Luminal A)	Positive	Positive	Negative	T1c	N0(i-)	M1	IV	Divorced	Insured	No	No	No	22	Alive	69	Alive	Alive or dead of other cause	Alive or dead due to cancer
37	Black	Black	Female	8523	Poorly differentiated; Grade III	HR+/HER2- (Luminal A)	Positive	Negative	Negative	T4d	N2a	M1	IV	Single (never married)	Insured	No	No	Yes	52	Dead	11	Breast	Dead (attributable to this cancer dx)	Alive or dead due to cancer
72	White	White	Female	8500	Unknown	HR+/HER2- (Luminal A)	Positive	Positive	Negative	T2	N1	M1	IV	Married (including common law)	Insured	No	No	Yes	0	Dead	47	Breast	Dead (attributable to this cancer dx)	Alive or dead due to cancer
47	White	White	Female	8010	Poorly differentiated; Grade III	HR+/HER2+ (Luminal B)	Positive	Negative	Positive	T4d	N3NOS	M1	IV	Married (including common law)	Any Medicaid	Yes	Yes	Yes	0	Dead	2	Breast	Dead (attributable to this cancer dx)	Alive or dead due to cancer
55	White	White	Female	8507	Poorly differentiated; Grade III	HR+/HER2+ (Luminal B)	Positive	Positive	Positive	T2	N2a	M1	IV	Single (never married)	Any Medicaid	No	No	No	0	Dead	25	Breast	Dead (attributable to this cancer dx)	Alive or dead due to cancer
78	White	White	Female	8010	Poorly differentiated; Grade III	HR-/HER2+ (HER2 enriched)	Negative	Negative	Positive	T4d	N3c	M1	IV	Divorced	Insured	No	Yes	Yes	0	Dead	2	Breast	Dead (attributable to this cancer dx)	Alive or dead due to cancer
55	White	White	Female	8500	Poorly differentiated; Grade III	HR+/HER2- (Luminal A)	Positive	Negative	Negative	T2	N0	M1	IV	Married (including common law)	Insured	No	No	No	41	Alive	73	Alive	Alive or dead of other cause	Alive or dead due to cancer
51	White	White	Female	8500	Poorly differentiated; Grade III	HR-/HER2+ (HER2 enriched)	Negative	Negative	Positive	T4d	N2a	M1	IV	Divorced	Any Medicaid	No	Yes	Yes	50	Alive	60	Alive	Alive or dead of other cause	Alive or dead due to cancer
77	Other (American Indian/AK Native, Asian/Pacific Islander)	Asian or Pacific Islander	Female	8500	Poorly differentiated; Grade III	HR-/HER2- (Triple Negative)	Negative	Negative	Negative	T1c	N0	M1	IV	Married (including common law)	Any Medicaid	No	No	No	0	Dead	6	Breast	Dead (attributable to this cancer dx)	Alive or dead due to cancer
66	White	White	Female	8500	Poorly differentiated; Grade III	HR+/HER2- (Luminal A)	Positive	Negative	Negative	T4b	N3b	M1	IV	Married (including common law)	Any Medicaid	No	No	No	0	Dead	6	Breast	Dead (attributable to this cancer dx)	Alive or dead due to cancer
41	White	White	Female	8522	Poorly differentiated; Grade III	HR+/HER2- (Luminal A)	Positive	Positive	Negative	T1c	N1	M1	IV	Married (including common law)	Insured	No	Yes	No	0	Dead	41	Breast	Dead (attributable to this cancer dx)	Alive or dead due to cancer
74	White	White	Female	8500	Moderately differentiated; Grade II	HR+/HER2- (Luminal A)	Positive	Negative	Negative	T2	N3c	M1	IV	Married (including common law)	Insured	No	No	Yes	22	Alive	81	Alive	Alive or dead of other cause	Alive or dead due to cancer
64	Other (American Indian/AK Native, Asian/Pacific Islander)	Asian or Pacific Islander	Female	8500	Poorly differentiated; Grade III	HR+/HER2- (Luminal A)	Positive	Positive	Negative	T4b	N1	M1	IV	Divorced	Insured	No	No	Yes	22	Dead	44	Breast	Dead (attributable to this cancer dx)	Alive or dead due to cancer
69	White	White	Female	8522	Well differentiated; Grade I	HR+/HER2- (Luminal A)	Positive	Positive	Negative	T4a	N1	M1	IV	Married (including common law)	Insured/No specifics	No	No	No	0	Dead	27	Breast	Dead (attributable to this cancer dx)	Alive or dead due to cancer
49	White	White	Female	8500	Moderately differentiated; Grade II	HR+/HER2- (Luminal A)	Positive	Positive	Negative	T4b	N1mi	M1	IV	Single (never married)	Any Medicaid	No	Yes	No	22	Alive	73	Alive	Alive or dead of other cause	Alive or dead due to cancer
55	Black	Black	Female	8500	Moderately differentiated; Grade II	HR-/HER2- (Triple Negative)	Negative	Negative	Negative	T4d	N3c	M1	IV	Single (never married)	Any Medicaid	No	No	No	0	Dead	14	Breast	Dead (attributable to this cancer dx)	Alive or dead due to cancer
38	Other (American Indian/AK Native, Asian/Pacific Islander)	Asian or Pacific Islander	Female	8500	Poorly differentiated; Grade III	HR+/HER2- (Luminal A)	Positive	Positive	Negative	T2	N3a	M1	IV	Married (including common law)	Insured	No	No	No	51	Dead	26	Breast	Dead (attributable to this cancer dx)	Alive or dead due to cancer
72	White	White	Female	8500	Moderately differentiated; Grade II	HR+/HER2- (Luminal A)	Positive	Positive	Negative	T1c	N1	M1	IV	Widowed	Insured/No specifics	No	No	No	0	Dead	10	Breast	Dead (attributable to this cancer dx)	Alive or dead due to cancer
69	Other (American Indian/AK Native, Asian/Pacific Islander)	Asian or Pacific Islander	Female	8500	Moderately differentiated; Grade II	HR+/HER2- (Luminal A)	Positive	Positive	Negative	T1b	N1	M1	IV	Widowed	Any Medicaid	No	No	No	0	Dead	26	Breast	Dead (attributable to this cancer dx)	Alive or dead due to cancer
76	White	White	Female	8500	Poorly differentiated; Grade III	HR+/HER2- (Luminal A)	Positive	Negative	Negative	T2	N2a	M1	IV	Single (never married)	Insured	No	No	Yes	22	Dead	62	Acute Myeloid Leukemia	Alive or dead of other cause	Dead (attributable to causes other than this cancer dx)
58	White	White	Female	8500	Well differentiated; Grade I	HR+/HER2- (Luminal A)	Positive	Positive	Negative	T1c	N0	M1	IV	Married (including common law)	Uninsured	No	No	No	20	Alive	14	Alive	Alive or dead of other cause	Alive or dead due to cancer
83	White	White	Female	8500	Unknown	HR+/HER2- (Luminal A)	Positive	Positive	Negative	T3	N3a	M1	IV	Married (including common law)	Insured/No specifics	Yes	No	No	0	Dead	19	Other Cause of Death	Alive or dead of other cause	Dead (attributable to causes other than this cancer dx)
51	White	White	Female	8500	Moderately differentiated; Grade II	HR+/HER2- (Luminal A)	Positive	Positive	Negative	T2	N1	M1	IV	Single (never married)	Any Medicaid	No	No	Yes	20	Dead	44	Breast	Dead (attributable to this cancer dx)	Alive or dead due to cancer
51	Other (American Indian/AK Native, Asian/Pacific Islander)	Asian or Pacific Islander	Female	8500	Unknown	HR+/HER2- (Luminal A)	Positive	Positive	Negative	T4b	N1	M1	IV	Married (including common law)	Insured	No	No	No	0	Dead	53	Breast	Dead (attributable to this cancer dx)	Alive or dead due to cancer
57	White	White	Female	8500	Unknown	HR+/HER2+ (Luminal B)	Positive	Negative	Positive	T2	N1	M1	IV	Married (including common law)	Insured	No	No	No	0	Alive	66	Alive	Alive or dead of other cause	Alive or dead due to cancer
63	White	White	Female	8500	Moderately differentiated; Grade II	HR+/HER2- (Luminal A)	Positive	Positive	Negative	T1c	N0	M1	IV	Married (including common law)	Insured	Yes	No	No	0	Dead	8	Diseases of Heart	Alive or dead of other cause	Dead (attributable to causes other than this cancer dx)
38	Black	Black	Female	8500	Poorly differentiated; Grade III	HR+/HER2- (Luminal A)	Positive	Positive	Negative	T2	N1	M1	IV	Married (including common law)	Any Medicaid	No	No	No	58	Alive	66	Alive	Alive or dead of other cause	Alive or dead due to cancer
40	White	White	Female	8500	Poorly differentiated; Grade III	HR+/HER2- (Luminal A)	Positive	Positive	Negative	T4d	N1	M1	IV	Married (including common law)	Insured	No	Yes	No	0	Dead	20	Breast	Dead (attributable to this cancer dx)	Alive or dead due to cancer
62	Black	Black	Female	8500	Poorly differentiated; Grade III	HR-/HER2- (Triple Negative)	Negative	Negative	Negative	T1c	N0	M1	IV	Unknown	Any Medicaid	No	Yes	Yes	0	Dead	2	Breast	Dead (attributable to this cancer dx)	Alive or dead due to cancer
36	White	White	Female	8500	Moderately differentiated; Grade II	HR+/HER2- (Luminal A)	Positive	Positive	Negative	T2	N1a	M1	IV	Married (including common law)	Insured	No	No	No	63	Alive	70	Alive	Alive or dead of other cause	Alive or dead due to cancer
52	White	White	Female	8520	Unknown	HR+/HER2- (Luminal A)	Positive	Positive	Negative	T1c	N0	M1	IV	Married (including common law)	Insured	No	Yes	No	0	Dead	27	Breast	Dead (attributable to this cancer dx)	Alive or dead due to cancer
69	White	White	Female	8500	Poorly differentiated; Grade III	HR-/HER2+ (HER2 enriched)	Negative	Negative	Positive	T4c	N2NOS	M1	IV	Divorced	Insured	No	Yes	No	46	Dead	45	Breast	Dead (attributable to this cancer dx)	Alive or dead due to cancer
72	Other (American Indian/AK Native, Asian/Pacific Islander)	Asian or Pacific Islander	Female	8480	Well differentiated; Grade I	HR+/HER2- (Luminal A)	Positive	Positive	Negative	T2	N2a	M1	IV	Widowed	Any Medicaid	No	No	No	51	Dead	45	Breast	Dead (attributable to this cancer dx)	Alive or dead due to cancer
77	White	White	Female	8500	Moderately differentiated; Grade II	HR+/HER2+ (Luminal B)	Positive	Negative	Positive	T1c	N1	M1	IV	Married (including common law)	Insured	No	No	Yes	0	Dead	28	Breast	Dead (attributable to this cancer dx)	Alive or dead due to cancer
52	Other (American Indian/AK Native, Asian/Pacific Islander)	Asian or Pacific Islander	Female	8530	Poorly differentiated; Grade III	HR+/HER2- (Luminal A)	Positive	Positive	Negative	T4d	N1	M1	IV	Married (including common law)	Any Medicaid	No	No	No	0	Alive	61	Alive	Alive or dead of other cause	Alive or dead due to cancer
51	White	White	Female	8500	Unknown	HR+/HER2- (Luminal A)	Positive	Positive	Negative	T1c	N2a	M1	IV	Married (including common law)	Insured	No	No	Yes	53	Alive	60	Alive	Alive or dead of other cause	Alive or dead due to cancer
53	White	White	Female	8530	Poorly differentiated; Grade III	HR+/HER2- (Luminal A)	Positive	Positive	Negative	T4d	N1	M1	IV	Unmarried or Domestic Partner	Insured	No	No	No	0	Dead	55	Breast	Dead (attributable to this cancer dx)	Alive or dead due to cancer
57	Other (American Indian/AK Native, Asian/Pacific Islander)	Asian or Pacific Islander	Female	8500	Poorly differentiated; Grade III	HR+/HER2+ (Luminal B)	Positive	Positive	Positive	T1a	N0	M1	IV	Married (including common law)	Any Medicaid	No	Yes	No	22	Dead	28	Breast	Dead (attributable to this cancer dx)	Alive or dead due to cancer
80	White	White	Female	8530	Undifferentiated; anaplastic; Grade IV	HR+/HER2- (Luminal A)	Positive	Negative	Negative	T4d	N2a	M1	IV	Unknown	Insured	No	No	No	51	Dead	9	Breast	Dead (attributable to this cancer dx)	Alive or dead due to cancer
55	Black	Black	Female	8520	Well differentiated; Grade I	HR+/HER2- (Luminal A)	Positive	Positive	Negative	T2	N1	M1	IV	Married (including common law)	Insured	No	No	No	0	Alive	59	Alive	Alive or dead of other cause	Alive or dead due to cancer
54	White	White	Female	8500	Poorly differentiated; Grade III	HR+/HER2+ (Luminal B)	Positive	Positive	Positive	T3	N0	M1	IV	Married (including common law)	Insured	No	No	No	0	Dead	16	Breast	Dead (attributable to this cancer dx)	Alive or dead due to cancer
64	White	White	Female	8500	Poorly differentiated; Grade III	HR+/HER2- (Luminal A)	Positive	Negative	Negative	T2	N2a	M1	IV	Single (never married)	Any Medicaid	No	No	No	41	Dead	58	Breast	Dead (attributable to this cancer dx)	Alive or dead due to cancer
62	White	White	Female	8500	Moderately differentiated; Grade II	HR+/HER2- (Luminal A)	Positive	Positive	Negative	T3	N1a	M1	IV	Married (including common law)	Insured	No	No	No	51	Dead	39	Breast	Dead (attributable to this cancer dx)	Alive or dead due to cancer
46	White	White	Female	8500	Moderately differentiated; Grade II	HR+/HER2+ (Luminal B)	Positive	Negative	Positive	T4b	N3b	M1	IV	Married (including common law)	Insured	No	No	No	0	Alive	63	Alive	Alive or dead of other cause	Alive or dead due to cancer
64	White	White	Female	8500	Moderately differentiated; Grade II	HR-/HER2+ (HER2 enriched)	Negative	Negative	Positive	T4d	N1	M1	IV	Married (including common law)	Any Medicaid	No	No	Yes	0	Dead	33	Breast	Dead (attributable to this cancer dx)	Alive or dead due to cancer
57	White	White	Female	8520	Moderately differentiated; Grade II	HR+/HER2- (Luminal A)	Positive	Negative	Negative	T3	N2a	M1	IV	Unmarried or Domestic Partner	Insured	No	No	No	51	Dead	44	Breast	Dead (attributable to this cancer dx)	Alive or dead due to cancer
45	White	White	Female	8520	Unknown	HR+/HER2- (Luminal A)	Positive	Positive	Negative	T1a	N1	M1	IV	Married (including common law)	Insured	No	No	No	22	Dead	46	Breast	Dead (attributable to this cancer dx)	Alive or dead due to cancer
60	White	White	Female	8500	Moderately differentiated; Grade II	HR+/HER2+ (Luminal B)	Positive	Negative	Positive	T2	N1a	M1	IV	Unknown	Insured	No	No	No	0	Dead	22	Breast	Dead (attributable to this cancer dx)	Alive or dead due to cancer
71	Black	Black	Female	8500	Moderately differentiated; Grade II	HR+/HER2+ (Luminal B)	Positive	Positive	Positive	T1c	N1	M1	IV	Single (never married)	Insured	No	No	No	0	Alive	59	Alive	Alive or dead of other cause	Alive or dead due to cancer
63	White	White	Female	8500	Moderately differentiated; Grade II	HR+/HER2- (Luminal A)	Positive	Positive	Negative	T1c	N0	M1	IV	Married (including common law)	Insured	No	Yes	Yes	0	Dead	39	Breast	Dead (attributable to this cancer dx)	Alive or dead due to cancer
89	White	White	Female	8500	Moderately differentiated; Grade II	HR-/HER2- (Triple Negative)	Negative	Negative	Negative	T4a	N0	M1	IV	Widowed	Insured	No	No	Yes	0	Dead	2	Breast	Dead (attributable to this cancer dx)	Alive or dead due to cancer
62	Other (American Indian/AK Native, Asian/Pacific Islander)	Asian or Pacific Islander	Female	8500	Moderately differentiated; Grade II	HR+/HER2- (Luminal A)	Positive	Positive	Negative	T4a	N1	M1	IV	Married (including common law)	Insured	No	No	Yes	0	Dead	4	Other Cause of Death	Alive or dead of other cause	Dead (attributable to causes other than this cancer dx)
65	White	White	Female	8500	Unknown	HR+/HER2- (Luminal A)	Positive	Positive	Negative	T4b	N2a	M1	IV	Married (including common law)	Insured/No specifics	No	No	Yes	0	Dead	26	Breast	Dead (attributable to this cancer dx)	Alive or dead due to cancer
34	Other (American Indian/AK Native, Asian/Pacific Islander)	Asian or Pacific Islander	Female	8500	Poorly differentiated; Grade III	HR+/HER2+ (Luminal B)	Positive	Positive	Positive	T2	N2a	M1	IV	Married (including common law)	Insured/No specifics	No	No	No	51	Dead	41	Breast	Dead (attributable to this cancer dx)	Alive or dead due to cancer
68	Black	Black	Female	8520	Moderately differentiated; Grade II	HR+/HER2+ (Luminal B)	Positive	Positive	Positive	T2	N1	M1	IV	Single (never married)	Insured	No	No	No	0	Alive	56	Alive	Alive or dead of other cause	Alive or dead due to cancer
53	Other (American Indian/AK Native, Asian/Pacific Islander)	Asian or Pacific Islander	Female	8500	Moderately differentiated; Grade II	HR+/HER2+ (Luminal B)	Positive	Negative	Positive	T2	N3b	M1	IV	Unknown	Insured	No	Yes	No	0	Alive	59	Alive	Alive or dead of other cause	Alive or dead due to cancer
85	White	White	Female	8522	Moderately differentiated; Grade II	HR+/HER2- (Luminal A)	Positive	Negative	Negative	T2	N2a	M1	IV	Married (including common law)	Insured	No	No	No	51	Alive	57	Alive	Alive or dead of other cause	Alive or dead due to cancer
61	Other (American Indian/AK Native, Asian/Pacific Islander)	Asian or Pacific Islander	Female	8140	Unknown	HR+/HER2- (Luminal A)	Positive	Positive	Negative	T1c	N1	M1	IV	Married (including common law)	Insured	No	No	No	0	Dead	15	Breast	Dead (attributable to this cancer dx)	Alive or dead due to cancer
69	Other (American Indian/AK Native, Asian/Pacific Islander)	Asian or Pacific Islander	Female	8500	Moderately differentiated; Grade II	HR+/HER2- (Luminal A)	Positive	Positive	Negative	T2	N1	M1	IV	Single (never married)	Insured	No	No	No	0	Alive	53	Alive	Alive or dead of other cause	Alive or dead due to cancer
89	White	White	Female	8500	Moderately differentiated; Grade II	HR+/HER2- (Luminal A)	Positive	Positive	Negative	T4b	N0	M1	IV	Married (including common law)	Insured	No	No	No	0	Dead	42	Breast	Dead (attributable to this cancer dx)	Alive or dead due to cancer
48	White	White	Female	8500	Well differentiated; Grade I	HR+/HER2- (Luminal A)	Positive	Positive	Negative	T2	N1	M1	IV	Single (never married)	Insured	No	No	No	0	Dead	43	Breast	Dead (attributable to this cancer dx)	Alive or dead due to cancer
40	White	White	Female	8500	Unknown	HR+/HER2- (Luminal A)	Positive	Positive	Negative	T4b	N2a	M1	IV	Single (never married)	Insured	No	No	No	0	Dead	19	Breast	Dead (attributable to this cancer dx)	Alive or dead due to cancer
60	White	White	Female	8500	Poorly differentiated; Grade III	HR+/HER2- (Luminal A)	Positive	Positive	Negative	T2	N1	M1	IV	Divorced	Any Medicaid	No	No	Yes	0	Dead	43	Breast	Dead (attributable to this cancer dx)	Alive or dead due to cancer
43	White	White	Female	8520	Well differentiated; Grade I	HR+/HER2- (Luminal A)	Positive	Positive	Negative	T3	N1	M1	IV	Married (including common law)	Insured	No	No	No	0	Dead	42	Breast	Dead (attributable to this cancer dx)	Alive or dead due to cancer
57	White	White	Female	8500	Moderately differentiated; Grade II	HR+/HER2+ (Luminal B)	Positive	Positive	Positive	T1c	N1	M1	IV	Married (including common law)	Insured	No	Yes	No	0	Alive	59	Alive	Alive or dead of other cause	Alive or dead due to cancer
75	White	White	Female	8500	Poorly differentiated; Grade III	HR+/HER2- (Luminal A)	Positive	Positive	Negative	T4b	N1a	M1	IV	Married (including common law)	Insured	No	No	No	51	Alive	51	Alive	Alive or dead of other cause	Alive or dead due to cancer
59	White	White	Female	8046	Poorly differentiated; Grade III	HR-/HER2- (Triple Negative)	Negative	Negative	Negative	T1c	N1	M1	IV	Married (including common law)	Insured	Yes	No	No	0	Dead	31	Lung and Bronchus	Alive or dead of other cause	Dead (attributable to causes other than this cancer dx)
74	Other (American Indian/AK Native, Asian/Pacific Islander)	Asian or Pacific Islander	Female	8500	Poorly differentiated; Grade III	HR-/HER2- (Triple Negative)	Negative	Negative	Negative	T4a	N3c	M1	IV	Unknown	Insured	No	No	No	0	Dead	13	Breast	Dead (attributable to this cancer dx)	Alive or dead due to cancer
67	White	White	Female	8500	Moderately differentiated; Grade II	HR+/HER2- (Luminal A)	Positive	Positive	Negative	T2	N0	M1	IV	Married (including common law)	Insured	No	No	No	41	Alive	55	Alive	Alive or dead of other cause	Alive or dead due to cancer
48	White	White	Female	8500	Unknown	HR+/HER2- (Luminal A)	Positive	Negative	Negative	T1b	N1	M1	IV	Married (including common law)	Insured	No	No	No	0	Dead	39	Breast	Dead (attributable to this cancer dx)	Alive or dead due to cancer
72	White	White	Female	8520	Unknown	HR+/HER2- (Luminal A)	Positive	Positive	Negative	T1c	N1	M1	IV	Widowed	Insured/No specifics	No	No	No	0	Dead	11	Breast	Dead (attributable to this cancer dx)	Alive or dead due to cancer
50	Other (American Indian/AK Native, Asian/Pacific Islander)	Asian or Pacific Islander	Female	8500	Moderately differentiated; Grade II	HR+/HER2- (Luminal A)	Positive	Positive	Negative	T2	N2a	M1	IV	Married (including common law)	Insured	No	Yes	Yes	0	Dead	38	Breast	Dead (attributable to this cancer dx)	Alive or dead due to cancer
76	Other (American Indian/AK Native, Asian/Pacific Islander)	Asian or Pacific Islander	Female	8500	Moderately differentiated; Grade II	HR+/HER2- (Luminal A)	Positive	Positive	Negative	T2	N1	M1	IV	Widowed	Any Medicaid	No	No	No	0	Alive	58	Alive	Alive or dead of other cause	Alive or dead due to cancer
55	Other (American Indian/AK Native, Asian/Pacific Islander)	Asian or Pacific Islander	Female	8500	Moderately differentiated; Grade II	HR+/HER2- (Luminal A)	Positive	Positive	Negative	T3	N1	M1	IV	Married (including common law)	Insured	No	No	No	0	Dead	46	Breast	Dead (attributable to this cancer dx)	Alive or dead due to cancer
65	White	White	Female	8500	Moderately differentiated; Grade II	HR+/HER2- (Luminal A)	Positive	Positive	Negative	T4b	N1a	M1	IV	Married (including common law)	Insured	No	No	No	42	Alive	51	Alive	Alive or dead of other cause	Alive or dead due to cancer
52	White	White	Female	8524	Unknown	HR+/HER2- (Luminal A)	Positive	Unknown	Negative	T4d	N3c	M1	IV	Married (including common law)	Insured	No	No	Yes	0	Dead	2	Breast	Dead (attributable to this cancer dx)	Alive or dead due to cancer
76	White	White	Female	8500	Moderately differentiated; Grade II	HR+/HER2- (Luminal A)	Positive	Positive	Negative	T4d	N3c	M1	IV	Widowed	Insured/No specifics	Yes	No	No	0	Dead	1	Breast	Dead (attributable to this cancer dx)	Alive or dead due to cancer
63	Other (American Indian/AK Native, Asian/Pacific Islander)	Asian or Pacific Islander	Female	8520	Unknown	HR+/HER2- (Luminal A)	Positive	Positive	Negative	T2	N0	M1	IV	Married (including common law)	Insured	No	No	No	0	Dead	43	Breast	Dead (attributable to this cancer dx)	Alive or dead due to cancer
63	White	White	Female	8500	Moderately differentiated; Grade II	HR+/HER2+ (Luminal B)	Positive	Positive	Positive	T4d	N3NOS	M1	IV	Divorced	Any Medicaid	No	No	Yes	80	Alive	55	Alive	Alive or dead of other cause	Alive or dead due to cancer
51	Other (American Indian/AK Native, Asian/Pacific Islander)	Asian or Pacific Islander	Female	8500	Moderately differentiated; Grade II	HR-/HER2+ (HER2 enriched)	Negative	Negative	Positive	T4b	N3c	M1	IV	Widowed	Any Medicaid	No	No	No	51	Alive	46	Alive	Alive or dead of other cause	Alive or dead due to cancer
33	White	White	Female	8500	Moderately differentiated; Grade II	HR+/HER2- (Luminal A)	Positive	Positive	Negative	T2	N1	M1	IV	Married (including common law)	Insured	No	No	No	0	Dead	24	Breast	Dead (attributable to this cancer dx)	Alive or dead due to cancer
46	Black	Black	Female	8500	Poorly differentiated; Grade III	HR+/HER2- (Luminal A)	Positive	Positive	Negative	T4a	N1	M1	IV	Single (never married)	Insured/No specifics	No	Yes	Yes	0	Dead	5	Breast	Dead (attributable to this cancer dx)	Alive or dead due to cancer
80	White	White	Female	8520	Well differentiated; Grade I	HR+/HER2- (Luminal A)	Positive	Negative	Negative	T2	N3c	M1	IV	Divorced	Any Medicaid	No	Yes	No	0	Dead	18	Breast	Dead (attributable to this cancer dx)	Alive or dead due to cancer
50	Other (American Indian/AK Native, Asian/Pacific Islander)	Asian or Pacific Islander	Female	8522	Poorly differentiated; Grade III	HR+/HER2- (Luminal A)	Positive	Positive	Negative	T2	N0	M1	IV	Unknown	Insured	No	Yes	No	51	Alive	52	Alive	Alive or dead of other cause	Alive or dead due to cancer
60	White	White	Female	8500	Unknown	HR-/HER2- (Triple Negative)	Negative	Negative	Negative	T4b	N0	M1	IV	Divorced	Insured/No specifics	No	No	Yes	60	Dead	4	Breast	Dead (attributable to this cancer dx)	Alive or dead due to cancer
61	White	White	Female	8500	Unknown	HR+/HER2- (Luminal A)	Positive	Positive	Negative	T3	N1	M1	IV	Single (never married)	Insured	No	No	No	0	Alive	51	Alive	Alive or dead of other cause	Alive or dead due to cancer
70	White	White	Female	8500	Poorly differentiated; Grade III	HR-/HER2- (Triple Negative)	Negative	Negative	Negative	T2	N1a	M1	IV	Married (including common law)	Any Medicaid	No	No	Yes	0	Dead	26	Diseases of Heart	Alive or dead of other cause	Dead (attributable to causes other than this cancer dx)
67	White	White	Female	8520	Moderately differentiated; Grade II	HR+/HER2- (Luminal A)	Positive	Positive	Negative	T3	N1mi	M1	IV	Married (including common law)	Insured/No specifics	No	No	No	40	Alive	50	Alive	Alive or dead of other cause	Alive or dead due to cancer
43	Other (American Indian/AK Native, Asian/Pacific Islander)	Asian or Pacific Islander	Female	8500	Poorly differentiated; Grade III	HR+/HER2+ (Luminal B)	Positive	Positive	Positive	T3	N2a	M1	IV	Single (never married)	Insured	No	No	No	51	Alive	52	Alive	Alive or dead of other cause	Alive or dead due to cancer
81	White	White	Female	8401	Moderately differentiated; Grade II	HR-/HER2- (Triple Negative)	Negative	Negative	Negative	T2	N1a	M1	IV	Widowed	Insured	No	No	Yes	22	Dead	2	Breast	Dead (attributable to this cancer dx)	Alive or dead due to cancer
37	White	White	Female	8500	Poorly differentiated; Grade III	HR+/HER2- (Luminal A)	Positive	Positive	Negative	T4d	N3b	M1	IV	Married (including common law)	Insured	No	No	No	0	Alive	49	Alive	Alive or dead of other cause	Alive or dead due to cancer
56	White	White	Female	8500	Poorly differentiated; Grade III	HR+/HER2- (Luminal A)	Positive	Negative	Negative	T4d	N1	M1	IV	Married (including common law)	Insured	No	No	Yes	51	Dead	41	Breast	Dead (attributable to this cancer dx)	Alive or dead due to cancer
34	White	White	Female	8500	Moderately differentiated; Grade II	HR+/HER2- (Luminal A)	Positive	Positive	Negative	T3	N1	M1	IV	Single (never married)	Any Medicaid	No	No	No	0	Dead	16	Breast	Dead (attributable to this cancer dx)	Alive or dead due to cancer
64	Black	Black	Female	8500	Moderately differentiated; Grade II	HR+/HER2- (Luminal A)	Positive	Positive	Negative	T4b	N1	M1	IV	Widowed	Insured/No specifics	No	Yes	Yes	0	Dead	11	Breast	Dead (attributable to this cancer dx)	Alive or dead due to cancer
60	White	White	Female	8523	Poorly differentiated; Grade III	HR+/HER2- (Luminal A)	Positive	Positive	Negative	T2	N1	M1	IV	Single (never married)	Any Medicaid	No	No	No	0	Alive	48	Alive	Alive or dead of other cause	Alive or dead due to cancer
77	White	White	Female	8520	Poorly differentiated; Grade III	HR+/HER2- (Luminal A)	Positive	Negative	Negative	T3	N3a	M1	IV	Married (including common law)	Insured	No	Yes	No	51	Alive	53	Alive	Alive or dead of other cause	Alive or dead due to cancer
60	White	White	Female	8520	Well differentiated; Grade I	HR+/HER2- (Luminal A)	Positive	Positive	Negative	T1b	N0	M1	IV	Married (including common law)	Insured	No	No	No	0	Dead	50	Breast	Dead (attributable to this cancer dx)	Alive or dead due to cancer
88	Black	Black	Female	8500	Poorly differentiated; Grade III	HR+/HER2+ (Luminal B)	Positive	Positive	Positive	T4b	N0	M1	IV	Divorced	Any Medicaid	No	No	No	0	Dead	38	Breast	Dead (attributable to this cancer dx)	Alive or dead due to cancer
44	White	White	Female	8500	Moderately differentiated; Grade II	HR+/HER2- (Luminal A)	Positive	Positive	Negative	T2	N1	M1	IV	Married (including common law)	Insured	No	No	Yes	0	Dead	41	Breast	Dead (attributable to this cancer dx)	Alive or dead due to cancer
53	White	White	Female	8500	Moderately differentiated; Grade II	HR-/HER2- (Triple Negative)	Negative	Negative	Negative	T2	N1	M1	IV	Single (never married)	Any Medicaid	No	No	No	0	Dead	9	Breast	Dead (attributable to this cancer dx)	Alive or dead due to cancer
56	Other (American Indian/AK Native, Asian/Pacific Islander)	Asian or Pacific Islander	Female	8010	Unknown	HR+/HER2- (Luminal A)	Positive	Negative	Negative	T4b	N2a	M1	IV	Single (never married)	Insured	No	No	Yes	0	Dead	14	Breast	Dead (attributable to this cancer dx)	Alive or dead due to cancer
58	White	White	Female	8500	Moderately differentiated; Grade II	HR+/HER2+ (Luminal B)	Positive	Negative	Positive	T4a	N1	M1	IV	Married (including common law)	Any Medicaid	No	No	Yes	0	Alive	47	Alive	Alive or dead of other cause	Alive or dead due to cancer
42	White	White	Female	8523	Poorly differentiated; Grade III	HR+/HER2- (Luminal A)	Positive	Positive	Negative	T2	N2a	M1	IV	Married (including common law)	Insured	No	No	No	24	Dead	32	Breast	Dead (attributable to this cancer dx)	Alive or dead due to cancer
55	White	White	Female	8500	Moderately differentiated; Grade II	HR-/HER2+ (HER2 enriched)	Negative	Negative	Positive	T4d	N2a	M1	IV	Single (never married)	Insured	No	No	No	0	Alive	47	Alive	Alive or dead of other cause	Alive or dead due to cancer
49	White	White	Female	8520	Moderately differentiated; Grade II	HR+/HER2- (Luminal A)	Positive	Positive	Negative	T2	N1	M1	IV	Married (including common law)	Insured	No	No	No	0	Dead	44	Breast	Dead (attributable to this cancer dx)	Alive or dead due to cancer
61	Black	Black	Female	8500	Poorly differentiated; Grade III	HR+/HER2- (Luminal A)	Positive	Positive	Negative	T1c	N0	M1	IV	Single (never married)	Any Medicaid	No	No	No	22	Dead	15	Breast	Dead (attributable to this cancer dx)	Alive or dead due to cancer
97	White	White	Female	8500	Poorly differentiated; Grade III	HR+/HER2- (Luminal A)	Positive	Positive	Negative	T2	N0	M1	IV	Widowed	Insured	No	No	No	0	Dead	22	Breast	Dead (attributable to this cancer dx)	Alive or dead due to cancer
72	Other (American Indian/AK Native, Asian/Pacific Islander)	Asian or Pacific Islander	Female	8500	Poorly differentiated; Grade III	HR+/HER2- (Luminal A)	Positive	Positive	Negative	T4b	N1a	M1	IV	Unknown	Insured	No	No	No	41	Dead	14	Breast	Dead (attributable to this cancer dx)	Alive or dead due to cancer
55	Other (American Indian/AK Native, Asian/Pacific Islander)	Asian or Pacific Islander	Female	8140	Poorly differentiated; Grade III	HR-/HER2- (Triple Negative)	Negative	Negative	Negative	T4b	N3c	M1	IV	Single (never married)	Insured	No	Yes	Yes	0	Dead	2	Breast	Dead (attributable to this cancer dx)	Alive or dead due to cancer
36	Other (American Indian/AK Native, Asian/Pacific Islander)	Asian or Pacific Islander	Female	8500	Poorly differentiated; Grade III	HR+/HER2- (Luminal A)	Positive	Negative	Negative	T4d	N3c	M1	IV	Married (including common law)	Insured	No	Yes	No	51	Dead	14	Breast	Dead (attributable to this cancer dx)	Alive or dead due to cancer
50	White	White	Female	8520	Well differentiated; Grade I	HR+/HER2- (Luminal A)	Positive	Positive	Negative	T1c	N1	M1	IV	Married (including common law)	Insured	No	No	No	0	Alive	47	Alive	Alive or dead of other cause	Alive or dead due to cancer
40	White	White	Female	8500	Poorly differentiated; Grade III	HR+/HER2+ (Luminal B)	Positive	Positive	Positive	T3	N1	M1	IV	Unmarried or Domestic Partner	Insured	No	No	No	41	Alive	46	Alive	Alive or dead of other cause	Alive or dead due to cancer
31	Other (American Indian/AK Native, Asian/Pacific Islander)	Asian or Pacific Islander	Female	8500	Poorly differentiated; Grade III	HR+/HER2+ (Luminal B)	Positive	Positive	Positive	T3	N1	M1	IV	Single (never married)	Any Medicaid	No	Yes	No	22	Alive	43	Alive	Alive or dead of other cause	Alive or dead due to cancer
37	Other (American Indian/AK Native, Asian/Pacific Islander)	Asian or Pacific Islander	Female	8500	Poorly differentiated; Grade III	HR+/HER2- (Luminal A)	Positive	Positive	Negative	T2	N0	M1	IV	Married (including common law)	Insured	No	No	No	0	Dead	28	Breast	Dead (attributable to this cancer dx)	Alive or dead due to cancer
32	Other (American Indian/AK Native, Asian/Pacific Islander)	Asian or Pacific Islander	Female	8500	Poorly differentiated; Grade III	HR+/HER2- (Luminal A)	Positive	Positive	Negative	T4d	N1	M1	IV	Married (including common law)	Insured	No	No	No	0	Dead	32	Breast	Dead (attributable to this cancer dx)	Alive or dead due to cancer
72	Other (American Indian/AK Native, Asian/Pacific Islander)	Asian or Pacific Islander	Female	8500	Moderately differentiated; Grade II	HR-/HER2- (Triple Negative)	Negative	Negative	Negative	T2	N1	M1	IV	Divorced	Any Medicaid	No	No	Yes	0	Dead	2	Breast	Dead (attributable to this cancer dx)	Alive or dead due to cancer
65	White	White	Female	8500	Poorly differentiated; Grade III	HR+/HER2+ (Luminal B)	Positive	Negative	Positive	T1c	N1	M1	IV	Married (including common law)	Insured	No	No	No	0	Dead	21	Breast	Dead (attributable to this cancer dx)	Alive or dead due to cancer
49	White	White	Female	8500	Moderately differentiated; Grade II	HR+/HER2+ (Luminal B)	Positive	Positive	Positive	T1c	N1NOS	M1	IV	Widowed	Any Medicaid	No	Yes	No	22	Alive	50	Alive	Alive or dead of other cause	Alive or dead due to cancer
55	White	White	Female	8500	Moderately differentiated; Grade II	HR+/HER2- (Luminal A)	Positive	Positive	Negative	T2	N0	M1	IV	Single (never married)	Any Medicaid	No	No	No	20	Dead	26	Accidents and Adverse Effects	Alive or dead of other cause	Dead (attributable to causes other than this cancer dx)
79	White	White	Female	8520	Moderately differentiated; Grade II	HR+/HER2- (Luminal A)	Positive	Positive	Negative	T1c	N2a	M1	IV	Married (including common law)	Insured	No	No	No	22	Alive	44	Alive	Alive or dead of other cause	Alive or dead due to cancer
90	Black	Black	Female	8500	Moderately differentiated; Grade II	HR+/HER2- (Luminal A)	Positive	Negative	Negative	T4d	N2a	M1	IV	Single (never married)	Insured	No	No	No	0	Dead	17	Breast	Dead (attributable to this cancer dx)	Alive or dead due to cancer
75	White	White	Female	8500	Moderately differentiated; Grade II	HR+/HER2- (Luminal A)	Positive	Negative	Negative	T1b	N0	M1	IV	Widowed	Insured	No	Yes	No	0	Dead	23	Breast	Dead (attributable to this cancer dx)	Alive or dead due to cancer
45	White	White	Female	8140	Unknown	HR-/HER2- (Triple Negative)	Negative	Negative	Negative	T4b	N3c	M1	IV	Divorced	Any Medicaid	No	No	Yes	0	Dead	5	Accidents and Adverse Effects	Alive or dead of other cause	Dead (attributable to causes other than this cancer dx)
74	White	White	Female	8500	Poorly differentiated; Grade III	HR+/HER2- (Luminal A)	Positive	Positive	Negative	T4d	N3b	M1	IV	Married (including common law)	Insured	No	No	No	51	Dead	25	Breast	Dead (attributable to this cancer dx)	Alive or dead due to cancer
57	White	White	Female	8010	Undifferentiated; anaplastic; Grade IV	HR-/HER2- (Triple Negative)	Negative	Negative	Negative	T1b	N1	M1	IV	Married (including common law)	Insured	No	No	No	0	Dead	29	Breast	Dead (attributable to this cancer dx)	Alive or dead due to cancer
67	White	White	Female	8500	Poorly differentiated; Grade III	HR+/HER2- (Luminal A)	Positive	Negative	Negative	T4b	N3c	M1	IV	Single (never married)	Insured	Yes	Yes	Yes	0	Dead	27	Breast	Dead (attributable to this cancer dx)	Alive or dead due to cancer
56	Other (American Indian/AK Native, Asian/Pacific Islander)	Asian or Pacific Islander	Female	8500	Poorly differentiated; Grade III	HR+/HER2+ (Luminal B)	Positive	Positive	Positive	T2	N1	M1	IV	Married (including common law)	Uninsured	No	No	No	0	Alive	41	Alive	Alive or dead of other cause	Alive or dead due to cancer
63	White	White	Female	8500	Moderately differentiated; Grade II	HR+/HER2- (Luminal A)	Positive	Positive	Negative	T2	N1mi	M1	IV	Single (never married)	Insured	No	No	No	0	Alive	42	Alive	Alive or dead of other cause	Alive or dead due to cancer
39	Other (American Indian/AK Native, Asian/Pacific Islander)	Asian or Pacific Islander	Female	8500	Poorly differentiated; Grade III	HR+/HER2- (Luminal A)	Positive	Positive	Negative	T2	N2a	M1	IV	Married (including common law)	Insured	No	No	No	22	Alive	43	Alive	Alive or dead of other cause	Alive or dead due to cancer
68	Other (American Indian/AK Native, Asian/Pacific Islander)	Asian or Pacific Islander	Female	8520	Unknown	HR+/HER2- (Luminal A)	Positive	Negative	Negative	T2	N2b	M1	IV	Unknown	Insured	No	No	No	0	Dead	7	Breast	Dead (attributable to this cancer dx)	Alive or dead due to cancer
70	White	White	Female	8500	Moderately differentiated; Grade II	HR+/HER2- (Luminal A)	Positive	Positive	Negative	T3	N2a	M1	IV	Married (including common law)	Insured	No	No	No	41	Alive	41	Alive	Alive or dead of other cause	Alive or dead due to cancer
44	White	White	Female	8522	Poorly differentiated; Grade III	HR+/HER2+ (Luminal B)	Positive	Negative	Positive	T2	N0	M1	IV	Married (including common law)	Insured	No	No	No	22	Alive	40	Alive	Alive or dead of other cause	Alive or dead due to cancer
70	White	White	Female	8500	Moderately differentiated; Grade II	HR+/HER2- (Luminal A)	Positive	Positive	Negative	T4b	N3c	M1	IV	Single (never married)	Insured	No	No	Yes	0	Alive	40	Alive	Alive or dead of other cause	Alive or dead due to cancer
49	Other (American Indian/AK Native, Asian/Pacific Islander)	Asian or Pacific Islander	Female	8500	Moderately differentiated; Grade II	HR+/HER2- (Luminal A)	Positive	Positive	Negative	T2	N1a	M1	IV	Married (including common law)	Insured	No	No	No	22	Alive	41	Alive	Alive or dead of other cause	Alive or dead due to cancer
62	White	White	Female	8500	Moderately differentiated; Grade II	HR+/HER2- (Luminal A)	Positive	Positive	Negative	T4a	N1	M1	IV	Married (including common law)	Insured	No	No	No	0	Dead	32	Breast	Dead (attributable to this cancer dx)	Alive or dead due to cancer
45	White	White	Female	8500	Moderately differentiated; Grade II	HR+/HER2+ (Luminal B)	Positive	Positive	Positive	T2	N1	M1	IV	Married (including common law)	Insured/No specifics	Yes	No	No	0	Alive	38	Alive	Alive or dead of other cause	Alive or dead due to cancer
54	White	White	Female	8500	Poorly differentiated; Grade III	HR+/HER2+ (Luminal B)	Positive	Positive	Positive	T1c	N1	M1	IV	Married (including common law)	Insured	No	No	No	22	Alive	38	Alive	Alive or dead of other cause	Alive or dead due to cancer
37	Other (American Indian/AK Native, Asian/Pacific Islander)	Asian or Pacific Islander	Female	8140	Unknown	HR+/HER2- (Luminal A)	Positive	Positive	Negative	T2	N1	M1	IV	Married (including common law)	Insured	No	No	No	0	Alive	38	Alive	Alive or dead of other cause	Alive or dead due to cancer
41	Other (American Indian/AK Native, Asian/Pacific Islander)	Asian or Pacific Islander	Female	8500	Poorly differentiated; Grade III	HR+/HER2+ (Luminal B)	Positive	Positive	Positive	T2	N1NOS	M1	IV	Married (including common law)	Insured	No	No	No	0	Alive	39	Alive	Alive or dead of other cause	Alive or dead due to cancer
36	Other (American Indian/AK Native, Asian/Pacific Islander)	Asian or Pacific Islander	Female	8500	Poorly differentiated; Grade III	HR-/HER2+ (HER2 enriched)	Negative	Negative	Positive	T4d	N1	M1	IV	Married (including common law)	Insured	No	No	No	59	Alive	41	Alive	Alive or dead of other cause	Alive or dead due to cancer
74	White	White	Female	8500	Poorly differentiated; Grade III	HR+/HER2- (Luminal A)	Positive	Positive	Negative	T2	N2a	M1	IV	Married (including common law)	Insured	No	No	No	21	Alive	38	Alive	Alive or dead of other cause	Alive or dead due to cancer
58	White	White	Female	8500	Poorly differentiated; Grade III	HR+/HER2+ (Luminal B)	Positive	Negative	Positive	T4c	N1	M1	IV	Married (including common law)	Insured	No	No	Yes	90	Alive	37	Alive	Alive or dead of other cause	Alive or dead due to cancer
50	Other (American Indian/AK Native, Asian/Pacific Islander)	Asian or Pacific Islander	Female	8500	Poorly differentiated; Grade III	HR+/HER2- (Luminal A)	Positive	Negative	Negative	T4b	N1	M1	IV	Married (including common law)	Any Medicaid	No	No	No	0	Alive	48	Alive	Alive or dead of other cause	Alive or dead due to cancer
78	Black	Black	Female	8522	Unknown	HR+/HER2- (Luminal A)	Positive	Positive	Negative	T1c	N3NOS	M1	IV	Separated	Insured	No	No	No	0	Dead	21	Breast	Dead (attributable to this cancer dx)	Alive or dead due to cancer
58	White	White	Female	8500	Moderately differentiated; Grade II	HR+/HER2- (Luminal A)	Positive	Positive	Negative	T1b	N1	M1	IV	Married (including common law)	Insured	No	No	No	0	Alive	37	Alive	Alive or dead of other cause	Alive or dead due to cancer
65	White	White	Female	8500	Poorly differentiated; Grade III	HR+/HER2- (Luminal A)	Positive	Positive	Negative	T4d	N1	M1	IV	Single (never married)	Insured/No specifics	Yes	Yes	Yes	0	Dead	3	Breast	Dead (attributable to this cancer dx)	Alive or dead due to cancer
55	White	White	Female	8480	Moderately differentiated; Grade II	HR+/HER2- (Luminal A)	Positive	Positive	Negative	T4d	N3c	M1	IV	Single (never married)	Insured	No	No	No	76	Alive	37	Alive	Alive or dead of other cause	Alive or dead due to cancer
40	Other (American Indian/AK Native, Asian/Pacific Islander)	Asian or Pacific Islander	Female	8500	Poorly differentiated; Grade III	HR+/HER2- (Luminal A)	Positive	Positive	Negative	T4b	N2NOS	M1	IV	Married (including common law)	Insured	No	Yes	Yes	0	Dead	5	Breast	Dead (attributable to this cancer dx)	Alive or dead due to cancer
49	Black	Black	Female	8500	Well differentiated; Grade I	HR+/HER2- (Luminal A)	Positive	Positive	Negative	T2	N1	M1	IV	Unknown	Insured	No	Yes	No	0	Alive	36	Alive	Alive or dead of other cause	Alive or dead due to cancer
45	White	White	Female	8500	Moderately differentiated; Grade II	HR+/HER2- (Luminal A)	Positive	Positive	Negative	T2	N2a	M1	IV	Married (including common law)	Insured	No	No	No	22	Alive	35	Alive	Alive or dead of other cause	Alive or dead due to cancer
62	White	White	Female	8500	Poorly differentiated; Grade III	HR+/HER2- (Luminal A)	Positive	Negative	Negative	T4b	N1	M1	IV	Single (never married)	Insured	No	No	No	24	Alive	35	Alive	Alive or dead of other cause	Alive or dead due to cancer
61	Other (American Indian/AK Native, Asian/Pacific Islander)	Asian or Pacific Islander	Female	8500	Moderately differentiated; Grade II	HR+/HER2+ (Luminal B)	Positive	Positive	Positive	T2	N1	M1	IV	Married (including common law)	Insured	No	Yes	Yes	0	Alive	35	Alive	Alive or dead of other cause	Alive or dead due to cancer
46	Other (American Indian/AK Native, Asian/Pacific Islander)	American Indian/Alaska Native	Female	8010	Unknown	HR+/HER2- (Luminal A)	Positive	Positive	Negative	T2	N0	M1	IV	Single (never married)	Any Medicaid	Yes	No	No	0	Alive	34	Alive	Alive or dead of other cause	Alive or dead due to cancer
88	Black	Black	Female	8500	Well differentiated; Grade I	HR+/HER2- (Luminal A)	Positive	Positive	Negative	T4c	N3b	M1	IV	Widowed	Insured	No	No	No	90	Dead	1	Breast	Dead (attributable to this cancer dx)	Alive or dead due to cancer
31	Black	Black	Female	8500	Moderately differentiated; Grade II	HR-/HER2- (Triple Negative)	Negative	Negative	Negative	T1NOS	N0	M1	IV	Single (never married)	Insured	No	Yes	Yes	0	Dead	16	Breast	Dead (attributable to this cancer dx)	Alive or dead due to cancer
62	White	White	Female	8523	Poorly differentiated; Grade III	HR+/HER2- (Luminal A)	Positive	Positive	Negative	T4a	N0	M1	IV	Single (never married)	Any Medicaid	No	No	No	0	Dead	27	Breast	Dead (attributable to this cancer dx)	Alive or dead due to cancer
35	Other (American Indian/AK Native, Asian/Pacific Islander)	Asian or Pacific Islander	Female	8500	Moderately differentiated; Grade II	HR+/HER2+ (Luminal B)	Positive	Positive	Positive	T1b	N0	M1	IV	Married (including common law)	Insured	No	Yes	No	0	Dead	6	Breast	Dead (attributable to this cancer dx)	Alive or dead due to cancer
74	Other (American Indian/AK Native, Asian/Pacific Islander)	Asian or Pacific Islander	Female	8520	Moderately differentiated; Grade II	HR+/HER2- (Luminal A)	Positive	Borderline	Negative	T2	N2a	M1	IV	Widowed	Any Medicaid	No	No	No	22	Dead	22	Breast	Dead (attributable to this cancer dx)	Alive or dead due to cancer
51	White	White	Female	8522	Moderately differentiated; Grade II	HR+/HER2- (Luminal A)	Positive	Positive	Negative	T1b	N2a	M1	IV	Married (including common law)	Insured	No	No	No	22	Alive	34	Alive	Alive or dead of other cause	Alive or dead due to cancer
50	Other (American Indian/AK Native, Asian/Pacific Islander)	American Indian/Alaska Native	Female	8500	Poorly differentiated; Grade III	HR+/HER2- (Luminal A)	Positive	Positive	Negative	T3	N1	M1	IV	Married (including common law)	Insured	Yes	No	No	0	Dead	34	Breast	Dead (attributable to this cancer dx)	Alive or dead due to cancer
54	Other (American Indian/AK Native, Asian/Pacific Islander)	Asian or Pacific Islander	Female	8500	Moderately differentiated; Grade II	HR+/HER2- (Luminal A)	Positive	Positive	Negative	T3	N2a	M1	IV	Single (never married)	Any Medicaid	No	No	No	22	Alive	32	Alive	Alive or dead of other cause	Alive or dead due to cancer
70	White	White	Female	8522	Poorly differentiated; Grade III	HR+/HER2- (Luminal A)	Positive	Positive	Negative	T1c	N1	M1	IV	Single (never married)	Insured/No specifics	No	No	Yes	0	Dead	1	Breast	Dead (attributable to this cancer dx)	Alive or dead due to cancer
37	White	White	Female	8520	Moderately differentiated; Grade II	HR+/HER2- (Luminal A)	Positive	Positive	Negative	T3	N1	M1	IV	Single (never married)	Insured	No	No	No	0	Alive	34	Alive	Alive or dead of other cause	Alive or dead due to cancer
79	White	White	Female	8500	Moderately differentiated; Grade II	HR+/HER2- (Luminal A)	Positive	Positive	Negative	T4b	N1	M1	IV	Widowed	Insured	No	No	Yes	22	Dead	1	Breast	Dead (attributable to this cancer dx)	Alive or dead due to cancer
63	White	White	Female	8500	Poorly differentiated; Grade III	HR+/HER2- (Luminal A)	Positive	Positive	Negative	T2	N3a	M1	IV	Divorced	Insured	No	No	No	53	Alive	32	Alive	Alive or dead of other cause	Alive or dead due to cancer
37	White	White	Female	8500	Poorly differentiated; Grade III	HR+/HER2- (Luminal A)	Positive	Negative	Negative	T2	N2a	M1	IV	Married (including common law)	Insured	No	No	No	45	Alive	32	Alive	Alive or dead of other cause	Alive or dead due to cancer
64	White	White	Female	8500	Unknown	HR+/HER2- (Luminal A)	Positive	Negative	Negative	T4b	N1	M1	IV	Single (never married)	Any Medicaid	No	No	No	0	Alive	35	Alive	Alive or dead of other cause	Alive or dead due to cancer
59	White	White	Female	8500	Poorly differentiated; Grade III	HR+/HER2- (Luminal A)	Positive	Positive	Negative	T2	N2a	M1	IV	Single (never married)	Insured	No	Yes	No	22	Alive	25	Alive	Alive or dead of other cause	Alive or dead due to cancer
70	White	White	Female	8500	Moderately differentiated; Grade II	HR+/HER2+ (Luminal B)	Positive	Positive	Positive	T2	N2a	M1	IV	Divorced	Insured	No	No	No	41	Alive	32	Alive	Alive or dead of other cause	Alive or dead due to cancer
45	White	White	Female	8500	Moderately differentiated; Grade II	HR+/HER2- (Luminal A)	Positive	Positive	Negative	T4b	N1	M1	IV	Single (never married)	Insured	Yes	Yes	Yes	0	Alive	16	Alive	Alive or dead of other cause	Alive or dead due to cancer
57	White	White	Female	8522	Moderately differentiated; Grade II	HR-/HER2+ (HER2 enriched)	Negative	Negative	Positive	T3	N1	M1	IV	Divorced	Insured	No	Yes	No	0	Alive	29	Alive	Alive or dead of other cause	Alive or dead due to cancer
59	White	White	Female	8500	Moderately differentiated; Grade II	HR+/HER2- (Luminal A)	Positive	Positive	Negative	T3	N1	M1	IV	Married (including common law)	Insured	No	Yes	No	0	Dead	6	Breast	Dead (attributable to this cancer dx)	Alive or dead due to cancer
46	Other (American Indian/AK Native, Asian/Pacific Islander)	Asian or Pacific Islander	Female	8500	Unknown	HR+/HER2+ (Luminal B)	Positive	Positive	Positive	T4a	N0	M1	IV	Married (including common law)	Insured	No	No	No	0	Alive	30	Alive	Alive or dead of other cause	Alive or dead due to cancer
60	White	White	Female	8530	Poorly differentiated; Grade III	HR+/HER2- (Luminal A)	Positive	Positive	Negative	T4d	N3c	M1	IV	Married (including common law)	Insured/No specifics	No	Yes	Yes	0	Alive	3	Alive	Alive or dead of other cause	Alive or dead due to cancer
51	White	White	Female	8500	Moderately differentiated; Grade II	HR+/HER2- (Luminal A)	Positive	Positive	Negative	T3	N1NOS	M1	IV	Single (never married)	Insured	No	No	No	22	Alive	31	Alive	Alive or dead of other cause	Alive or dead due to cancer
60	Black	Black	Female	8010	Moderately differentiated; Grade II	HR+/HER2- (Luminal A)	Positive	Positive	Negative	T3	N1NOS	M1	IV	Married (including common law)	Insured	No	No	No	51	Alive	30	Alive	Alive or dead of other cause	Alive or dead due to cancer
82	White	White	Female	8140	Unknown	HR+/HER2- (Luminal A)	Positive	Positive	Negative	T3	N0	M1	IV	Divorced	Insured	No	No	Yes	0	Dead	1	Breast	Dead (attributable to this cancer dx)	Alive or dead due to cancer
67	White	White	Female	8520	Moderately differentiated; Grade II	HR+/HER2- (Luminal A)	Positive	Negative	Negative	T2	N3c	M1	IV	Married (including common law)	Insured	No	No	No	41	Dead	27	Breast	Dead (attributable to this cancer dx)	Alive or dead due to cancer
46	White	White	Female	8500	Poorly differentiated; Grade III	HR+/HER2+ (Luminal B)	Positive	Positive	Positive	T4b	N1	M1	IV	Single (never married)	Insured	No	No	No	48	Alive	33	Alive	Alive or dead of other cause	Alive or dead due to cancer
57	White	White	Female	8500	Well differentiated; Grade I	HR+/HER2- (Luminal A)	Positive	Positive	Negative	T1c	N0	M1	IV	Single (never married)	Any Medicaid	No	No	No	0	Alive	30	Alive	Alive or dead of other cause	Alive or dead due to cancer
56	White	White	Female	8500	Moderately differentiated; Grade II	HR+/HER2- (Luminal A)	Positive	Negative	Negative	T3	N2b	M1	IV	Married (including common law)	Insured	No	No	No	0	Alive	26	Alive	Alive or dead of other cause	Alive or dead due to cancer
43	Other (American Indian/AK Native, Asian/Pacific Islander)	Asian or Pacific Islander	Female	8500	Moderately differentiated; Grade II	HR+/HER2- (Luminal A)	Positive	Positive	Negative	T2	N0	M1	IV	Single (never married)	Any Medicaid	No	No	No	0	Alive	29	Alive	Alive or dead of other cause	Alive or dead due to cancer
53	Other (American Indian/AK Native, Asian/Pacific Islander)	Asian or Pacific Islander	Female	8500	Well differentiated; Grade I	HR+/HER2- (Luminal A)	Positive	Positive	Negative	T2	N1	M1	IV	Married (including common law)	Insured	No	Yes	No	0	Dead	14	Breast	Dead (attributable to this cancer dx)	Alive or dead due to cancer
56	Other (American Indian/AK Native, Asian/Pacific Islander)	Asian or Pacific Islander	Female	8500	Unknown	HR+/HER2+ (Luminal B)	Positive	Negative	Positive	T2	N1	M1	IV	Married (including common law)	Insured	No	Yes	No	0	Dead	4	Breast	Dead (attributable to this cancer dx)	Alive or dead due to cancer
80	White	White	Female	8500	Moderately differentiated; Grade II	HR+/HER2- (Luminal A)	Positive	Positive	Negative	T2	N0	M1	IV	Married (including common law)	Insured	No	No	Yes	0	Dead	18	Diseases of Heart	Alive or dead of other cause	Dead (attributable to causes other than this cancer dx)
63	White	White	Female	8500	Moderately differentiated; Grade II	HR+/HER2- (Luminal A)	Positive	Positive	Negative	T2	N0	M1	IV	Single (never married)	Insured	No	No	No	22	Alive	27	Alive	Alive or dead of other cause	Alive or dead due to cancer
44	White	White	Female	8500	Moderately differentiated; Grade II	HR+/HER2- (Luminal A)	Positive	Positive	Negative	T3	N2NOS	M1	IV	Married (including common law)	Insured	No	No	No	46	Alive	26	Alive	Alive or dead of other cause	Alive or dead due to cancer
68	White	White	Female	8500	Poorly differentiated; Grade III	HR+/HER2- (Luminal A)	Positive	Negative	Negative	T2	N1NOS	M1	IV	Single (never married)	Insured/No specifics	No	No	No	20	Alive	29	Alive	Alive or dead of other cause	Alive or dead due to cancer
59	White	White	Female	8500	Unknown	HR-/HER2+ (HER2 enriched)	Negative	Negative	Positive	T2	N1	M1	IV	Single (never married)	Insured	No	No	No	0	Alive	30	Alive	Alive or dead of other cause	Alive or dead due to cancer
67	White	White	Female	8520	Unknown	HR+/HER2- (Luminal A)	Positive	Positive	Negative	T2	N0	M1	IV	Single (never married)	Insured	No	No	No	0	Alive	30	Alive	Alive or dead of other cause	Alive or dead due to cancer
34	Black	Black	Female	8500	Poorly differentiated; Grade III	HR+/HER2+ (Luminal B)	Positive	Positive	Positive	T4b	N0	M1	IV	Married (including common law)	Any Medicaid	Yes	Yes	Yes	0	Dead	15	Breast	Dead (attributable to this cancer dx)	Alive or dead due to cancer
69	Other (American Indian/AK Native, Asian/Pacific Islander)	Asian or Pacific Islander	Female	8500	Poorly differentiated; Grade III	HR+/HER2- (Luminal A)	Positive	Positive	Negative	T4b	N3c	M1	IV	Divorced	Any Medicaid	No	Yes	No	0	Alive	26	Alive	Alive or dead of other cause	Alive or dead due to cancer
56	White	White	Female	8500	Moderately differentiated; Grade II	HR+/HER2- (Luminal A)	Positive	Negative	Negative	T3	N2NOS	M1	IV	Married (including common law)	Insured	No	No	No	0	Alive	25	Alive	Alive or dead of other cause	Alive or dead due to cancer
31	White	White	Female	8500	Poorly differentiated; Grade III	HR+/HER2- (Luminal A)	Positive	Positive	Negative	T2	N2a	M1	IV	Married (including common law)	Insured	No	No	No	59	Alive	26	Alive	Alive or dead of other cause	Alive or dead due to cancer
55	White	White	Female	8520	Moderately differentiated; Grade II	HR+/HER2- (Luminal A)	Positive	Positive	Negative	T2	N0	M1	IV	Single (never married)	Any Medicaid	Yes	No	No	22	Alive	33	Alive	Alive or dead of other cause	Alive or dead due to cancer
64	Black	Black	Female	8500	Poorly differentiated; Grade III	HR+/HER2- (Luminal A)	Positive	Negative	Negative	T1c	N0	M1	IV	Married (including common law)	Insured	No	No	No	0	Alive	26	Alive	Alive or dead of other cause	Alive or dead due to cancer
40	White	White	Female	8500	Poorly differentiated; Grade III	HR+/HER2+ (Luminal B)	Positive	Positive	Positive	T3	N1	M1	IV	Married (including common law)	Insured	No	Yes	No	0	Alive	25	Alive	Alive or dead of other cause	Alive or dead due to cancer
64	Black	Black	Female	8500	Poorly differentiated; Grade III	HR-/HER2- (Triple Negative)	Negative	Negative	Negative	T3	N1	M1	IV	Single (never married)	Any Medicaid	No	No	No	0	Dead	10	Breast	Dead (attributable to this cancer dx)	Alive or dead due to cancer
60	White	White	Female	8500	Moderately differentiated; Grade II	HR+/HER2- (Luminal A)	Positive	Positive	Negative	T3	N0	M1	IV	Married (including common law)	Insured	No	No	Yes	0	Alive	24	Alive	Alive or dead of other cause	Alive or dead due to cancer
89	Black	Black	Female	8140	Unknown	HR+/HER2+ (Luminal B)	Positive	Positive	Positive	T2	N1	M1	IV	Single (never married)	Insured/No specifics	Yes	Yes	Yes	0	Dead	2	Breast	Dead (attributable to this cancer dx)	Alive or dead due to cancer
71	White	White	Female	8520	Unknown	HR+/HER2- (Luminal A)	Positive	Negative	Negative	T3	N1	M1	IV	Married (including common law)	Insured	No	No	No	0	Alive	26	Alive	Alive or dead of other cause	Alive or dead due to cancer
50	White	White	Female	8500	Moderately differentiated; Grade II	HR+/HER2- (Luminal A)	Positive	Positive	Negative	T1c	N0	M1	IV	Single (never married)	Insured	No	No	No	0	Dead	20	Breast	Dead (attributable to this cancer dx)	Alive or dead due to cancer
58	White	White	Female	8522	Poorly differentiated; Grade III	HR+/HER2- (Luminal A)	Positive	Negative	Negative	T2	N1	M1	IV	Divorced	Insured	No	Yes	No	0	Alive	25	Alive	Alive or dead of other cause	Alive or dead due to cancer
79	White	White	Female	8522	Moderately differentiated; Grade II	HR+/HER2- (Luminal A)	Positive	Positive	Negative	T1c	N1	M1	IV	Widowed	Insured	No	No	Yes	0	Alive	26	Alive	Alive or dead of other cause	Alive or dead due to cancer
46	Other (American Indian/AK Native, Asian/Pacific Islander)	Asian or Pacific Islander	Female	8500	Unknown	HR+/HER2+ (Luminal B)	Positive	Positive	Positive	T4b	N1	M1	IV	Married (including common law)	Insured	No	No	No	0	Alive	25	Alive	Alive or dead of other cause	Alive or dead due to cancer
86	White	White	Female	8500	Poorly differentiated; Grade III	HR-/HER2+ (HER2 enriched)	Negative	Negative	Positive	T2	N0	M1	IV	Widowed	Insured/No specifics	No	Yes	Yes	0	Dead	1	Breast	Dead (attributable to this cancer dx)	Alive or dead due to cancer
75	White	White	Female	8500	Well differentiated; Grade I	HR+/HER2- (Luminal A)	Positive	Positive	Negative	T3	N0	M1	IV	Divorced	Insured	No	No	No	0	Alive	24	Alive	Alive or dead of other cause	Alive or dead due to cancer
59	White	White	Female	8575	Poorly differentiated; Grade III	HR-/HER2- (Triple Negative)	Negative	Negative	Negative	T4d	N1	M1	IV	Single (never married)	Insured	No	No	No	41	Dead	8	Breast	Dead (attributable to this cancer dx)	Alive or dead due to cancer
53	White	White	Female	8500	Moderately differentiated; Grade II	HR+/HER2- (Luminal A)	Positive	Positive	Negative	T2	N3a	M1	IV	Married (including common law)	Insured	No	No	No	22	Alive	24	Alive	Alive or dead of other cause	Alive or dead due to cancer
47	Black	Black	Female	8500	Moderately differentiated; Grade II	HR+/HER2- (Luminal A)	Positive	Positive	Negative	T3	N0	M1	IV	Single (never married)	Insured	No	No	No	0	Dead	17	Breast	Dead (attributable to this cancer dx)	Alive or dead due to cancer
65	White	White	Female	8500	Moderately differentiated; Grade II	HR+/HER2- (Luminal A)	Positive	Positive	Negative	T2	N3a	M1	IV	Married (including common law)	Insured	No	No	No	51	Alive	23	Alive	Alive or dead of other cause	Alive or dead due to cancer
27	Black	Black	Female	8500	Moderately differentiated; Grade II	HR+/HER2+ (Luminal B)	Positive	Positive	Positive	T2	N1	M1	IV	Single (never married)	Any Medicaid	No	No	No	41	Alive	31	Alive	Alive or dead of other cause	Alive or dead due to cancer
55	White	White	Female	8520	Well differentiated; Grade I	HR+/HER2- (Luminal A)	Positive	Positive	Negative	T3	N1	M1	IV	Married (including common law)	Insured	No	No	No	0	Alive	21	Alive	Alive or dead of other cause	Alive or dead due to cancer
79	Other (American Indian/AK Native, Asian/Pacific Islander)	Asian or Pacific Islander	Female	8500	Moderately differentiated; Grade II	HR+/HER2- (Luminal A)	Positive	Negative	Negative	T4b	N0	M1	IV	Widowed	Any Medicaid	No	No	No	0	Dead	21	Breast	Dead (attributable to this cancer dx)	Alive or dead due to cancer
37	White	White	Female	8500	Well differentiated; Grade I	HR+/HER2- (Luminal A)	Positive	Positive	Negative	T2	N1	M1	IV	Single (never married)	Insured	No	No	No	0	Alive	20	Alive	Alive or dead of other cause	Alive or dead due to cancer
30	Other (American Indian/AK Native, Asian/Pacific Islander)	Asian or Pacific Islander	Female	8500	Moderately differentiated; Grade II	HR+/HER2- (Luminal A)	Positive	Positive	Negative	T1c	N1a	M1	IV	Married (including common law)	Insured	No	No	No	47	Alive	22	Alive	Alive or dead of other cause	Alive or dead due to cancer
63	White	White	Female	8010	Unknown	HR+/HER2+ (Luminal B)	Positive	Positive	Positive	T3	N1	M1	IV	Widowed	Insured	No	No	No	0	Dead	13	Breast	Dead (attributable to this cancer dx)	Alive or dead due to cancer
42	Other (American Indian/AK Native, Asian/Pacific Islander)	Asian or Pacific Islander	Female	8500	Poorly differentiated; Grade III	HR+/HER2+ (Luminal B)	Positive	Positive	Positive	T2	N1	M1	IV	Separated	Insured	No	No	No	0	Alive	21	Alive	Alive or dead of other cause	Alive or dead due to cancer
27	Black	Black	Female	8010	Moderately differentiated; Grade II	HR+/HER2- (Luminal A)	Positive	Positive	Negative	T3	N1	M1	IV	Single (never married)	Insured	No	Yes	No	0	Alive	26	Alive	Alive or dead of other cause	Alive or dead due to cancer
54	Other (American Indian/AK Native, Asian/Pacific Islander)	Asian or Pacific Islander	Female	8500	Poorly differentiated; Grade III	HR+/HER2- (Luminal A)	Positive	Positive	Negative	T2	N1a	M1	IV	Married (including common law)	Any Medicaid	No	No	No	22	Alive	31	Alive	Alive or dead of other cause	Alive or dead due to cancer
59	Other (American Indian/AK Native, Asian/Pacific Islander)	Asian or Pacific Islander	Female	8500	Moderately differentiated; Grade II	HR+/HER2- (Luminal A)	Positive	Positive	Negative	T3	N2NOS	M1	IV	Married (including common law)	Any Medicaid	No	No	No	0	Dead	2	Breast	Dead (attributable to this cancer dx)	Alive or dead due to cancer
58	Black	Black	Female	8500	Poorly differentiated; Grade III	HR+/HER2- (Luminal A)	Positive	Positive	Negative	T4d	N3NOS	M1	IV	Single (never married)	Insured	No	No	No	0	Alive	21	Alive	Alive or dead of other cause	Alive or dead due to cancer
41	Black	Black	Female	8520	Moderately differentiated; Grade II	HR+/HER2- (Luminal A)	Positive	Positive	Negative	T4b	N2a	M1	IV	Single (never married)	Insured/No specifics	No	No	No	0	Alive	23	Alive	Alive or dead of other cause	Alive or dead due to cancer
28	Other (American Indian/AK Native, Asian/Pacific Islander)	Asian or Pacific Islander	Female	8500	Poorly differentiated; Grade III	HR+/HER2- (Luminal A)	Positive	Positive	Negative	T2	N1	M1	IV	Single (never married)	Any Medicaid	No	Yes	No	0	Dead	19	Breast	Dead (attributable to this cancer dx)	Alive or dead due to cancer
71	White	White	Female	8500	Unknown	HR+/HER2- (Luminal A)	Positive	Negative	Negative	T1c	N1	M1	IV	Single (never married)	Insured	No	No	No	0	Alive	19	Alive	Alive or dead of other cause	Alive or dead due to cancer
89	Black	Black	Female	8500	Unknown	HR+/HER2- (Luminal A)	Positive	Positive	Negative	T2	N1	M1	IV	Widowed	Insured	No	No	No	0	Dead	9	Other Cause of Death	Alive or dead of other cause	Dead (attributable to causes other than this cancer dx)
40	White	White	Female	8520	Moderately differentiated; Grade II	HR+/HER2- (Luminal A)	Positive	Positive	Negative	T2	N2a	M1	IV	Divorced	Insured	No	No	No	30	Alive	19	Alive	Alive or dead of other cause	Alive or dead due to cancer
54	White	White	Female	8520	Well differentiated; Grade I	HR+/HER2- (Luminal A)	Positive	Positive	Negative	T4NOS	N1	M1	IV	Married (including common law)	Insured	No	No	No	0	Alive	18	Alive	Alive or dead of other cause	Alive or dead due to cancer
57	White	White	Female	8500	Moderately differentiated; Grade II	HR+/HER2- (Luminal A)	Positive	Negative	Negative	T4b	N0	M1	IV	Single (never married)	Any Medicaid	No	No	Yes	0	Alive	18	Alive	Alive or dead of other cause	Alive or dead due to cancer
60	White	White	Female	8500	Moderately differentiated; Grade II	HR+/HER2- (Luminal A)	Positive	Positive	Negative	T1c	N1	M1	IV	Widowed	Any Medicaid	No	Yes	Yes	0	Dead	3	Breast	Dead (attributable to this cancer dx)	Alive or dead due to cancer
46	Other (American Indian/AK Native, Asian/Pacific Islander)	Asian or Pacific Islander	Female	8500	Moderately differentiated; Grade II	HR+/HER2- (Luminal A)	Positive	Positive	Negative	T4b	N3c	M1	IV	Divorced	Insured	No	Yes	Yes	0	Alive	20	Alive	Alive or dead of other cause	Alive or dead due to cancer
36	Other (American Indian/AK Native, Asian/Pacific Islander)	Asian or Pacific Islander	Female	8500	Moderately differentiated; Grade II	HR+/HER2- (Luminal A)	Positive	Positive	Negative	T2	N0	M1	IV	Married (including common law)	Insured	No	No	No	41	Alive	19	Alive	Alive or dead of other cause	Alive or dead due to cancer
57	White	White	Female	8500	Poorly differentiated; Grade III	HR-/HER2+ (HER2 enriched)	Negative	Negative	Positive	T3	N0	M1	IV	Married (including common law)	Insured	Yes	Yes	No	0	Dead	1	Breast	Dead (attributable to this cancer dx)	Alive or dead due to cancer
52	Black	Black	Female	8503	Moderately differentiated; Grade II	HR-/HER2+ (HER2 enriched)	Negative	Negative	Positive	T2	N3a	M1	IV	Single (never married)	Any Medicaid	No	Yes	Yes	51	Dead	14	Breast	Dead (attributable to this cancer dx)	Alive or dead due to cancer
56	White	White	Female	8140	Unknown	HR+/HER2- (Luminal A)	Positive	Positive	Negative	T4a	N0	M1	IV	Single (never married)	Insured	No	No	No	0	Alive	19	Alive	Alive or dead of other cause	Alive or dead due to cancer
61	Other (American Indian/AK Native, Asian/Pacific Islander)	Asian or Pacific Islander	Female	8500	Moderately differentiated; Grade II	HR+/HER2- (Luminal A)	Positive	Positive	Negative	T2	N1	M1	IV	Widowed	Insured	No	No	No	0	Alive	18	Alive	Alive or dead of other cause	Alive or dead due to cancer
88	White	White	Female	8530	Poorly differentiated; Grade III	HR-/HER2+ (HER2 enriched)	Negative	Negative	Positive	T4d	N1	M1	IV	Married (including common law)	Insured	No	No	No	0	Dead	12	Breast	Dead (attributable to this cancer dx)	Alive or dead due to cancer
57	Other (American Indian/AK Native, Asian/Pacific Islander)	Asian or Pacific Islander	Female	8500	Poorly differentiated; Grade III	HR+/HER2- (Luminal A)	Positive	Positive	Negative	T4b	N2NOS	M1	IV	Single (never married)	Insured	No	No	No	80	Alive	17	Alive	Alive or dead of other cause	Alive or dead due to cancer
52	White	White	Female	8500	Well differentiated; Grade I	HR+/HER2- (Luminal A)	Positive	Positive	Negative	T2	N0	M1	IV	Unknown	Insured	No	No	No	0	Alive	16	Alive	Alive or dead of other cause	Alive or dead due to cancer
54	White	White	Female	8500	Unknown	HR+/HER2+ (Luminal B)	Positive	Negative	Positive	T4b	N1	M1	IV	Married (including common law)	Insured	No	Yes	No	0	Alive	17	Alive	Alive or dead of other cause	Alive or dead due to cancer
42	White	White	Female	8500	Poorly differentiated; Grade III	HR+/HER2- (Luminal A)	Positive	Positive	Negative	T4d	N1	M1	IV	Married (including common law)	Insured	No	No	No	41	Alive	16	Alive	Alive or dead of other cause	Alive or dead due to cancer
48	White	White	Female	8520	Moderately differentiated; Grade II	HR+/HER2- (Luminal A)	Positive	Positive	Negative	T3	N3a	M1	IV	Married (including common law)	Insured	No	No	No	55	Alive	16	Alive	Alive or dead of other cause	Alive or dead due to cancer
92	White	White	Female	8500	Unknown	HR+/HER2- (Luminal A)	Positive	Positive	Negative	T2	N1	M1	IV	Single (never married)	Insured	No	No	No	0	Alive	17	Alive	Alive or dead of other cause	Alive or dead due to cancer
45	White	White	Female	8500	Moderately differentiated; Grade II	HR+/HER2+ (Luminal B)	Positive	Negative	Positive	T4b	N2a	M1	IV	Married (including common law)	Insured	No	No	No	0	Alive	25	Alive	Alive or dead of other cause	Alive or dead due to cancer
44	Other (American Indian/AK Native, Asian/Pacific Islander)	Asian or Pacific Islander	Female	8500	Moderately differentiated; Grade II	HR+/HER2+ (Luminal B)	Positive	Positive	Positive	T4d	N0	M1	IV	Single (never married)	Any Medicaid	No	No	No	0	Alive	18	Alive	Alive or dead of other cause	Alive or dead due to cancer
77	Other (American Indian/AK Native, Asian/Pacific Islander)	Asian or Pacific Islander	Female	8500	Moderately differentiated; Grade II	HR+/HER2- (Luminal A)	Positive	Positive	Negative	T3	N1	M1	IV	Widowed	Insured/No specifics	No	No	Yes	0	Alive	14	Alive	Alive or dead of other cause	Alive or dead due to cancer
72	Other (American Indian/AK Native, Asian/Pacific Islander)	Asian or Pacific Islander	Female	8500	Poorly differentiated; Grade III	HR-/HER2- (Triple Negative)	Negative	Negative	Negative	T3	N3a	M1	IV	Single (never married)	Insured	No	No	No	51	Dead	12	Breast	Dead (attributable to this cancer dx)	Alive or dead due to cancer
57	Other (American Indian/AK Native, Asian/Pacific Islander)	Asian or Pacific Islander	Female	8140	Unknown	HR-/HER2+ (HER2 enriched)	Negative	Negative	Positive	T2	N2NOS	M1	IV	Married (including common law)	Any Medicaid	Yes	Yes	Yes	0	Dead	10	Breast	Dead (attributable to this cancer dx)	Alive or dead due to cancer
56	Black	Black	Female	8500	Unknown	HR+/HER2- (Luminal A)	Positive	Positive	Negative	T1c	N1	M1	IV	Married (including common law)	Any Medicaid	No	No	No	0	Alive	3	Alive	Alive or dead of other cause	Alive or dead due to cancer
76	Other (American Indian/AK Native, Asian/Pacific Islander)	Asian or Pacific Islander	Female	8500	Moderately differentiated; Grade II	HR+/HER2- (Luminal A)	Positive	Positive	Negative	T4a	N1	M1	IV	Unknown	Insured/No specifics	No	No	No	0	Alive	14	Alive	Alive or dead of other cause	Alive or dead due to cancer
57	White	White	Female	8520	Moderately differentiated; Grade II	HR+/HER2- (Luminal A)	Positive	Positive	Negative	T3	N1	M1	IV	Unmarried or Domestic Partner	Insured	No	No	No	0	Alive	18	Alive	Alive or dead of other cause	Alive or dead due to cancer
56	White	White	Female	8507	Poorly differentiated; Grade III	HR+/HER2- (Luminal A)	Positive	Negative	Negative	T4d	N1	M1	IV	Divorced	Insured	No	No	No	51	Alive	14	Alive	Alive or dead of other cause	Alive or dead due to cancer
52	Black	Black	Female	8500	Unknown	HR+/HER2- (Luminal A)	Positive	Negative	Negative	T4d	N3c	M1	IV	Married (including common law)	Insured	No	Yes	No	0	Dead	13	Breast	Dead (attributable to this cancer dx)	Alive or dead due to cancer
62	Other (American Indian/AK Native, Asian/Pacific Islander)	Asian or Pacific Islander	Female	8500	Moderately differentiated; Grade II	HR+/HER2- (Luminal A)	Positive	Positive	Negative	T3	N1	M1	IV	Divorced	Any Medicaid	Yes	No	No	0	Dead	16	Breast	Dead (attributable to this cancer dx)	Alive or dead due to cancer
44	Other (American Indian/AK Native, Asian/Pacific Islander)	Asian or Pacific Islander	Female	8500	Poorly differentiated; Grade III	HR+/HER2+ (Luminal B)	Positive	Positive	Positive	T2	N1	M1	IV	Married (including common law)	Any Medicaid	No	No	No	51	Alive	5	Alive	Alive or dead of other cause	Alive or dead due to cancer
78	White	White	Female	8140	Unknown	HR+/HER2- (Luminal A)	Positive	Positive	Negative	T4b	N2a	M1	IV	Widowed	Insured	No	No	No	0	Dead	13	Chronic Obstructive Pulmonary Disease and Allied Cond	Alive or dead of other cause	Dead (attributable to causes other than this cancer dx)
45	White	White	Female	8500	Moderately differentiated; Grade II	HR+/HER2+ (Luminal B)	Positive	Positive	Positive	T3	N1	M1	IV	Separated	Any Medicaid	No	Yes	No	0	Alive	12	Alive	Alive or dead of other cause	Alive or dead due to cancer
45	White	White	Female	8500	Poorly differentiated; Grade III	HR+/HER2- (Luminal A)	Positive	Negative	Negative	T1c	N3b	M1	IV	Married (including common law)	Insured	No	No	No	0	Alive	13	Alive	Alive or dead of other cause	Alive or dead due to cancer
73	White	White	Female	8520	Poorly differentiated; Grade III	HR+/HER2- (Luminal A)	Positive	Positive	Negative	T4a	N1	M1	IV	Married (including common law)	Insured	No	No	No	0	Alive	13	Alive	Alive or dead of other cause	Alive or dead due to cancer
55	White	White	Female	8500	Moderately differentiated; Grade II	HR+/HER2+ (Luminal B)	Positive	Positive	Positive	T3	N1	M1	IV	Single (never married)	Insured	No	No	No	0	Dead	9	Breast	Dead (attributable to this cancer dx)	Alive or dead due to cancer
91	White	White	Female	8500	Moderately differentiated; Grade II	HR+/HER2- (Luminal A)	Positive	Positive	Negative	T2	N1	M1	IV	Widowed	Insured/No specifics	No	No	No	0	Dead	1	Breast	Dead (attributable to this cancer dx)	Alive or dead due to cancer
40	White	White	Female	8500	Moderately differentiated; Grade II	HR+/HER2- (Luminal A)	Positive	Positive	Negative	T2	N1	M1	IV	Single (never married)	Insured	No	No	No	0	Alive	12	Alive	Alive or dead of other cause	Alive or dead due to cancer
80	White	White	Female	8500	Well differentiated; Grade I	HR+/HER2- (Luminal A)	Positive	Positive	Negative	T3	N0	M1	IV	Married (including common law)	Insured	No	No	No	0	Alive	12	Alive	Alive or dead of other cause	Alive or dead due to cancer
84	White	White	Female	8522	Well differentiated; Grade I	HR+/HER2- (Luminal A)	Positive	Positive	Negative	T4b	N0	M1	IV	Divorced	Insured	No	No	No	0	Alive	13	Alive	Alive or dead of other cause	Alive or dead due to cancer
59	White	White	Female	8500	Moderately differentiated; Grade II	HR+/HER2+ (Luminal B)	Positive	Negative	Positive	T2	N1	M1	IV	Single (never married)	Insured	No	No	No	0	Alive	13	Alive	Alive or dead of other cause	Alive or dead due to cancer
86	White	White	Female	8522	Moderately differentiated; Grade II	HR+/HER2- (Luminal A)	Positive	Positive	Negative	T2	N1	M1	IV	Widowed	Insured	No	No	No	0	Alive	14	Alive	Alive or dead of other cause	Alive or dead due to cancer
48	White	White	Female	8500	Unknown	HR+/HER2- (Luminal A)	Positive	Negative	Negative	T4b	N1	M1	IV	Single (never married)	Any Medicaid	No	Yes	No	0	Alive	14	Alive	Alive or dead of other cause	Alive or dead due to cancer
87	White	White	Female	8500	Moderately differentiated; Grade II	HR+/HER2+ (Luminal B)	Positive	Positive	Positive	T4b	N1	M1	IV	Married (including common law)	Insured/No specifics	No	No	No	0	Alive	13	Alive	Alive or dead of other cause	Alive or dead due to cancer
33	White	White	Female	8500	Poorly differentiated; Grade III	HR+/HER2- (Luminal A)	Positive	Positive	Negative	T1c	N1	M1	IV	Single (never married)	Insured	No	Yes	No	0	Alive	13	Alive	Alive or dead of other cause	Alive or dead due to cancer
41	Black	Black	Female	8500	Poorly differentiated; Grade III	HR+/HER2+ (Luminal B)	Positive	Positive	Positive	T2	N3c	M1	IV	Single (never married)	Any Medicaid	No	Yes	No	0	Alive	12	Alive	Alive or dead of other cause	Alive or dead due to cancer
53	White	White	Female	8010	Poorly differentiated; Grade III	HR+/HER2+ (Luminal B)	Positive	Negative	Positive	T2	N1	M1	IV	Married (including common law)	Insured	No	Yes	No	0	Alive	12	Alive	Alive or dead of other cause	Alive or dead due to cancer
51	White	White	Female	8500	Moderately differentiated; Grade II	HR+/HER2- (Luminal A)	Positive	Positive	Negative	T2	N1NOS	M1	IV	Single (never married)	Insured	No	Yes	No	0	Alive	12	Alive	Alive or dead of other cause	Alive or dead due to cancer
66	White	White	Female	8500	Moderately differentiated; Grade II	HR+/HER2- (Luminal A)	Positive	Positive	Negative	T2	N3a	M1	IV	Married (including common law)	Insured	No	No	No	55	Alive	12	Alive	Alive or dead of other cause	Alive or dead due to cancer
57	Black	Black	Female	8500	Poorly differentiated; Grade III	HR+/HER2+ (Luminal B)	Positive	Positive	Positive	T4d	N3b	M1	IV	Married (including common law)	Insured/No specifics	No	No	No	41	Alive	21	Alive	Alive or dead of other cause	Alive or dead due to cancer
75	White	White	Female	8500	Well differentiated; Grade I	HR+/HER2- (Luminal A)	Positive	Positive	Negative	T2	N1a	M1	IV	Married (including common law)	Insured	No	No	No	40	Alive	45	Alive	Alive or dead of other cause	Alive or dead due to cancer
71	White	White	Female	8201	Poorly differentiated; Grade III	HR+/HER2- (Luminal A)	Positive	Negative	Negative	T2	N1NOS	M1	IV	Married (including common law)	Insured	No	No	No	0	Dead	12	Breast	Dead (attributable to this cancer dx)	Alive or dead due to cancer
59	White	White	Female	8522	Poorly differentiated; Grade III	HR+/HER2- (Luminal A)	Positive	Positive	Negative	T2	N2a	M1	IV	Divorced	Insured/No specifics	No	Yes	No	51	Alive	33	Alive	Alive or dead of other cause	Alive or dead due to cancer
58	White	White	Female	8500	Moderately differentiated; Grade II	HR+/HER2- (Luminal A)	Positive	Positive	Negative	T3	N3a	M1	IV	Divorced	Insured	No	No	No	51	Dead	11	Breast	Dead (attributable to this cancer dx)	Alive or dead due to cancer
50	White	White	Female	8500	Moderately differentiated; Grade II	HR+/HER2- (Luminal A)	Positive	Positive	Negative	T2	N1	M1	IV	Married (including common law)	Insured	No	No	No	0	Dead	59	Breast	Dead (attributable to this cancer dx)	Alive or dead due to cancer
55	White	White	Female	8522	Moderately differentiated; Grade II	HR+/HER2- (Luminal A)	Positive	Positive	Negative	T4b	N0	M1	IV	Single (never married)	Uninsured	No	No	Yes	0	Dead	74	Breast	Dead (attributable to this cancer dx)	Alive or dead due to cancer
53	Other (American Indian/AK Native, Asian/Pacific Islander)	American Indian/Alaska Native	Female	8500	Well differentiated; Grade I	HR+/HER2- (Luminal A)	Positive	Negative	Negative	T1c	N0(i-)	M1	IV	Unknown	Insured	No	No	No	23	Alive	59	Alive	Alive or dead of other cause	Alive or dead due to cancer
58	White	White	Female	8520	Moderately differentiated; Grade II	HR-/HER2+ (HER2 enriched)	Negative	Negative	Positive	T1c	N0	M1	IV	Married (including common law)	Insured	No	No	No	0	Dead	5	Breast	Dead (attributable to this cancer dx)	Alive or dead due to cancer
57	White	White	Female	8500	Poorly differentiated; Grade III	HR+/HER2- (Luminal A)	Positive	Positive	Negative	T4b	N2a	M1	IV	Married (including common law)	Insured	No	No	No	51	Dead	37	Breast	Dead (attributable to this cancer dx)	Alive or dead due to cancer
80	White	White	Female	8520	Moderately differentiated; Grade II	HR+/HER2- (Luminal A)	Positive	Negative	Negative	T4a	N1	M1	IV	Widowed	Insured/No specifics	No	No	No	0	Dead	7	Breast	Dead (attributable to this cancer dx)	Alive or dead due to cancer
63	White	White	Female	8500	Poorly differentiated; Grade III	HR+/HER2- (Luminal A)	Positive	Positive	Negative	T4b	N3NOS	M1	IV	Divorced	Insured/No specifics	No	No	No	0	Dead	31	Breast	Dead (attributable to this cancer dx)	Alive or dead due to cancer
69	White	White	Female	8500	Moderately differentiated; Grade II	HR+/HER2- (Luminal A)	Positive	Positive	Negative	T4b	N2a	M1	IV	Married (including common law)	Insured	No	No	No	41	Alive	79	Alive	Alive or dead of other cause	Alive or dead due to cancer
80	White	White	Female	8500	Moderately differentiated; Grade II	HR+/HER2- (Luminal A)	Positive	Positive	Negative	T2	N0	M1	IV	Divorced	Insured	No	No	No	0	Dead	54	Diseases of Heart	Alive or dead of other cause	Dead (attributable to causes other than this cancer dx)
73	White	White	Female	8500	Poorly differentiated; Grade III	HR-/HER2- (Triple Negative)	Negative	Negative	Negative	T4a	N3a	M1	IV	Married (including common law)	Insured	No	No	No	40	Dead	10	Breast	Dead (attributable to this cancer dx)	Alive or dead due to cancer
55	White	White	Female	8523	Moderately differentiated; Grade II	HR+/HER2+ (Luminal B)	Positive	Negative	Positive	T3	N1	M1	IV	Single (never married)	Insured	No	No	No	0	Alive	80	Alive	Alive or dead of other cause	Alive or dead due to cancer
47	White	White	Female	8500	Poorly differentiated; Grade III	HR+/HER2- (Luminal A)	Positive	Positive	Negative	T2	N0	M1	IV	Divorced	Insured	No	No	No	0	Dead	37	Breast	Dead (attributable to this cancer dx)	Alive or dead due to cancer
44	White	White	Female	8522	Well differentiated; Grade I	HR+/HER2- (Luminal A)	Positive	Positive	Negative	T3	N1	M1	IV	Married (including common law)	Insured	No	No	No	0	Alive	75	Alive	Alive or dead of other cause	Alive or dead due to cancer
62	White	White	Female	8500	Poorly differentiated; Grade III	HR+/HER2- (Luminal A)	Positive	Negative	Negative	T4b	N2NOS	M1	IV	Widowed	Insured	Yes	No	No	0	Dead	7	Breast	Dead (attributable to this cancer dx)	Alive or dead due to cancer
42	White	White	Female	8522	Poorly differentiated; Grade III	HR+/HER2+ (Luminal B)	Positive	Positive	Positive	T4b	N1	M1	IV	Single (never married)	Insured	No	Yes	Yes	0	Dead	53	Breast	Dead (attributable to this cancer dx)	Alive or dead due to cancer
67	White	White	Female	8522	Poorly differentiated; Grade III	HR+/HER2- (Luminal A)	Positive	Positive	Negative	T4b	N2a	M1	IV	Widowed	Insured/No specifics	No	Yes	No	41	Dead	35	Breast	Dead (attributable to this cancer dx)	Alive or dead due to cancer
58	White	White	Female	8500	Poorly differentiated; Grade III	HR+/HER2- (Luminal A)	Positive	Positive	Negative	T4d	N3c	M1	IV	Married (including common law)	Any Medicaid	No	No	No	0	Dead	1	Breast	Dead (attributable to this cancer dx)	Alive or dead due to cancer
64	White	White	Male	8500	Poorly differentiated; Grade III	HR+/HER2- (Luminal A)	Positive	Positive	Negative	T4b	N2a	M1	IV	Single (never married)	Insured	No	No	Yes	22	Dead	68	Breast	Dead (attributable to this cancer dx)	Alive or dead due to cancer
41	White	White	Female	8500	Unknown	HR-/HER2- (Triple Negative)	Negative	Negative	Negative	T2	N1mi	M1	IV	Single (never married)	Insured/No specifics	No	No	No	59	Dead	17	Breast	Dead (attributable to this cancer dx)	Alive or dead due to cancer
81	White	White	Female	8500	Poorly differentiated; Grade III	HR+/HER2- (Luminal A)	Positive	Positive	Negative	T2	N1	M1	IV	Widowed	Insured/No specifics	No	No	No	0	Alive	78	Alive	Alive or dead of other cause	Alive or dead due to cancer
51	White	White	Female	8522	Moderately differentiated; Grade II	HR+/HER2+ (Luminal B)	Positive	Negative	Positive	T2	N2NOS	M1	IV	Divorced	Any Medicaid	No	No	Yes	0	Dead	42	Breast	Dead (attributable to this cancer dx)	Alive or dead due to cancer
65	White	White	Female	8522	Moderately differentiated; Grade II	HR+/HER2+ (Luminal B)	Positive	Positive	Positive	T4b	N1	M1	IV	Widowed	Insured	No	No	Yes	0	Alive	75	Alive	Alive or dead of other cause	Alive or dead due to cancer
82	White	White	Female	8520	Moderately differentiated; Grade II	HR+/HER2- (Luminal A)	Positive	Positive	Negative	T4d	N2a	M1	IV	Widowed	Insurance status unknown	No	No	Yes	0	Dead	24	Breast	Dead (attributable to this cancer dx)	Alive or dead due to cancer
58	White	White	Female	8520	Moderately differentiated; Grade II	HR+/HER2- (Luminal A)	Positive	Positive	Negative	T4b	N0	M1	IV	Divorced	Any Medicaid	No	No	No	0	Dead	27	Breast	Dead (attributable to this cancer dx)	Alive or dead due to cancer
76	White	White	Female	8010	Poorly differentiated; Grade III	HR+/HER2- (Luminal A)	Positive	Positive	Negative	T4b	N1	M1	IV	Married (including common law)	Insured	Yes	No	Yes	0	Dead	1	Other Cause of Death	Alive or dead of other cause	Dead (attributable to causes other than this cancer dx)
85	White	White	Female	8520	Moderately differentiated; Grade II	HR+/HER2- (Luminal A)	Positive	Positive	Negative	T2	N0	M1	IV	Single (never married)	Insured	No	No	No	0	Dead	15	Diseases of Heart	Alive or dead of other cause	Dead (attributable to causes other than this cancer dx)
45	Black	Black	Female	8500	Moderately differentiated; Grade II	HR+/HER2- (Luminal A)	Positive	Positive	Negative	T4a	N2NOS	M1	IV	Separated	Any Medicaid	No	No	Yes	0	Dead	24	Breast	Dead (attributable to this cancer dx)	Alive or dead due to cancer
63	White	White	Female	8520	Moderately differentiated; Grade II	HR+/HER2- (Luminal A)	Positive	Positive	Negative	T3	N1	M1	IV	Widowed	Insured	No	No	No	0	Dead	27	Breast	Dead (attributable to this cancer dx)	Alive or dead due to cancer
70	White	White	Female	8520	Well differentiated; Grade I	HR+/HER2- (Luminal A)	Positive	Negative	Negative	T2	N0	M1	IV	Single (never married)	Any Medicaid	No	No	No	0	Dead	3	Breast	Dead (attributable to this cancer dx)	Alive or dead due to cancer
60	White	White	Female	8500	Moderately differentiated; Grade II	HR+/HER2- (Luminal A)	Positive	Positive	Negative	T4b	N0	M1	IV	Single (never married)	Any Medicaid	No	No	No	0	Dead	36	Diseases of Heart	Alive or dead of other cause	Dead (attributable to causes other than this cancer dx)
79	White	White	Female	8520	Moderately differentiated; Grade II	HR+/HER2- (Luminal A)	Positive	Positive	Negative	T3	N1mi	M1	IV	Widowed	Insured	No	No	No	41	Dead	66	Breast	Dead (attributable to this cancer dx)	Alive or dead due to cancer
70	White	White	Female	8500	Poorly differentiated; Grade III	HR-/HER2- (Triple Negative)	Negative	Negative	Negative	T3	N0	M1	IV	Married (including common law)	Insured	No	Yes	No	0	Dead	1	Breast	Dead (attributable to this cancer dx)	Alive or dead due to cancer
38	White	White	Female	8530	Poorly differentiated; Grade III	HR-/HER2- (Triple Negative)	Negative	Negative	Negative	T4d	N1	M1	IV	Unknown	Insured	Yes	Yes	Yes	22	Dead	9	Breast	Dead (attributable to this cancer dx)	Alive or dead due to cancer
81	White	White	Female	8520	Moderately differentiated; Grade II	HR+/HER2- (Luminal A)	Positive	Positive	Negative	T2	N0	M1	IV	Widowed	Insured/No specifics	No	No	No	0	Dead	36	Stomach and Duodenal Ulcers	Alive or dead of other cause	Dead (attributable to causes other than this cancer dx)
73	White	White	Female	8500	Well differentiated; Grade I	HR+/HER2- (Luminal A)	Positive	Positive	Negative	T2	N1a	M1	IV	Married (including common law)	Insured	No	No	No	22	Alive	77	Alive	Alive or dead of other cause	Alive or dead due to cancer
73	White	White	Female	8500	Poorly differentiated; Grade III	HR+/HER2+ (Luminal B)	Positive	Negative	Positive	T4b	N2a	M1	IV	Divorced	Insured	No	Yes	Yes	54	Dead	24	Breast	Dead (attributable to this cancer dx)	Alive or dead due to cancer
62	White	White	Female	8522	Poorly differentiated; Grade III	HR+/HER2- (Luminal A)	Positive	Negative	Negative	T4b	N2NOS	M1	IV	Single (never married)	Any Medicaid	No	No	No	0	Dead	8	Breast	Dead (attributable to this cancer dx)	Alive or dead due to cancer
53	Black	Black	Female	8500	Moderately differentiated; Grade II	HR+/HER2- (Luminal A)	Positive	Positive	Negative	T3	N1	M1	IV	Single (never married)	Any Medicaid	No	No	No	0	Alive	78	Alive	Alive or dead of other cause	Alive or dead due to cancer
45	White	White	Female	8500	Moderately differentiated; Grade II	HR+/HER2- (Luminal A)	Positive	Positive	Negative	T2	N1	M1	IV	Married (including common law)	Insured/No specifics	No	No	No	0	Alive	83	Alive	Alive or dead of other cause	Alive or dead due to cancer
57	White	White	Female	8520	Moderately differentiated; Grade II	HR+/HER2- (Luminal A)	Positive	Positive	Negative	T2	N0	M1	IV	Single (never married)	Insured	No	No	No	0	Alive	82	Alive	Alive or dead of other cause	Alive or dead due to cancer
80	White	White	Female	8500	Poorly differentiated; Grade III	HR+/HER2- (Luminal A)	Positive	Positive	Negative	T4b	N3b	M1	IV	Widowed	Insured	No	No	Yes	0	Dead	14	Breast	Dead (attributable to this cancer dx)	Alive or dead due to cancer
48	White	White	Female	8500	Poorly differentiated; Grade III	HR-/HER2- (Triple Negative)	Negative	Negative	Negative	T3	N1	M1	IV	Single (never married)	Insured	No	No	No	52	Dead	15	Breast	Dead (attributable to this cancer dx)	Alive or dead due to cancer
64	White	White	Female	8500	Poorly differentiated; Grade III	HR+/HER2- (Luminal A)	Positive	Negative	Negative	T4b	N1	M1	IV	Married (including common law)	Insured	No	Yes	Yes	0	Dead	8	Breast	Dead (attributable to this cancer dx)	Alive or dead due to cancer
73	White	White	Female	8500	Moderately differentiated; Grade II	HR+/HER2- (Luminal A)	Positive	Positive	Negative	T2	N0	M1	IV	Married (including common law)	Insured	No	No	No	0	Dead	56	Breast	Dead (attributable to this cancer dx)	Alive or dead due to cancer
50	White	White	Female	8520	Well differentiated; Grade I	HR+/HER2- (Luminal A)	Positive	Positive	Negative	T4a	N2a	M1	IV	Married (including common law)	Insured	No	No	No	0	Dead	39	Breast	Dead (attributable to this cancer dx)	Alive or dead due to cancer
64	White	White	Female	8010	Poorly differentiated; Grade III	HR+/HER2- (Luminal A)	Positive	Positive	Negative	T4d	N1	M1	IV	Divorced	Insured	No	Yes	Yes	0	Dead	1	Breast	Dead (attributable to this cancer dx)	Alive or dead due to cancer
48	White	White	Female	8500	Poorly differentiated; Grade III	HR+/HER2- (Luminal A)	Positive	Positive	Negative	T4d	N3b	M1	IV	Married (including common law)	Uninsured	No	No	Yes	54	Dead	50	Breast	Dead (attributable to this cancer dx)	Alive or dead due to cancer
83	White	White	Female	8500	Poorly differentiated; Grade III	HR+/HER2- (Luminal A)	Positive	Positive	Negative	T2	N0	M1	IV	Divorced	Insurance status unknown	No	No	No	0	Dead	46	Breast	Dead (attributable to this cancer dx)	Alive or dead due to cancer
68	White	White	Female	8010	Poorly differentiated; Grade III	HR+/HER2- (Luminal A)	Positive	Positive	Negative	T4b	N1	M1	IV	Unknown	Insured	No	Yes	Yes	0	Dead	10	Breast	Dead (attributable to this cancer dx)	Alive or dead due to cancer
42	White	White	Female	8500	Moderately differentiated; Grade II	HR+/HER2- (Luminal A)	Positive	Positive	Negative	T2	N0	M1	IV	Single (never married)	Any Medicaid	No	No	Yes	0	Dead	68	Breast	Dead (attributable to this cancer dx)	Alive or dead due to cancer
66	White	White	Male	8500	Poorly differentiated; Grade III	HR-/HER2+ (HER2 enriched)	Negative	Negative	Positive	T1c	N0	M1	IV	Married (including common law)	Insured	No	No	No	0	Dead	4	Breast	Dead (attributable to this cancer dx)	Alive or dead due to cancer
82	White	White	Female	8500	Moderately differentiated; Grade II	HR+/HER2- (Luminal A)	Positive	Positive	Negative	T4NOS	N1	M1	IV	Married (including common law)	Insured/No specifics	No	No	No	0	Dead	38	Diseases of Heart	Alive or dead of other cause	Dead (attributable to causes other than this cancer dx)
59	White	White	Female	8500	Unknown	HR+/HER2- (Luminal A)	Positive	Negative	Negative	T2	N1	M1	IV	Married (including common law)	Insured	No	Yes	Yes	0	Alive	69	Alive	Alive or dead of other cause	Alive or dead due to cancer
60	White	White	Female	8500	Unknown	HR+/HER2- (Luminal A)	Positive	Negative	Negative	T4b	N1	M1	IV	Married (including common law)	Insurance status unknown	No	No	No	0	Dead	42	Breast	Dead (attributable to this cancer dx)	Alive or dead due to cancer
55	White	White	Female	8522	Moderately differentiated; Grade II	HR+/HER2- (Luminal A)	Positive	Positive	Negative	T2	N0	M1	IV	Divorced	Insured/No specifics	No	No	No	0	Alive	67	Alive	Alive or dead of other cause	Alive or dead due to cancer
67	White	White	Female	8520	Well differentiated; Grade I	HR+/HER2- (Luminal A)	Positive	Negative	Negative	T4b	N3c	M1	IV	Married (including common law)	Insured	No	No	No	0	Dead	14	Breast	Dead (attributable to this cancer dx)	Alive or dead due to cancer
55	Black	Black	Female	8500	Moderately differentiated; Grade II	HR+/HER2- (Luminal A)	Positive	Positive	Negative	T1c	N0	M1	IV	Married (including common law)	Uninsured	No	No	No	0	Alive	10	Alive	Alive or dead of other cause	Alive or dead due to cancer
39	White	White	Female	8500	Poorly differentiated; Grade III	HR+/HER2- (Luminal A)	Positive	Positive	Negative	T2	N0	M1	IV	Married (including common law)	Any Medicaid	No	No	No	0	Dead	33	Breast	Dead (attributable to this cancer dx)	Alive or dead due to cancer
69	White	White	Female	8500	Moderately differentiated; Grade II	HR+/HER2- (Luminal A)	Positive	Positive	Negative	T4b	N3NOS	M1	IV	Divorced	Insured/No specifics	No	Yes	Yes	0	Alive	78	Alive	Alive or dead of other cause	Alive or dead due to cancer
39	White	White	Female	8530	Poorly differentiated; Grade III	HR+/HER2- (Luminal A)	Positive	Positive	Negative	T4d	N1	M1	IV	Married (including common law)	Insured/No specifics	No	No	No	0	Dead	40	Breast	Dead (attributable to this cancer dx)	Alive or dead due to cancer
71	White	White	Female	8500	Poorly differentiated; Grade III	HR+/HER2- (Luminal A)	Positive	Negative	Negative	T4b	N1	M1	IV	Married (including common law)	Insured	No	No	Yes	0	Dead	3	Breast	Dead (attributable to this cancer dx)	Alive or dead due to cancer
34	Black	Black	Female	8500	Unknown	HR-/HER2- (Triple Negative)	Negative	Negative	Negative	T4a	N1	M1	IV	Married (including common law)	Insured	No	No	No	0	Dead	18	Breast	Dead (attributable to this cancer dx)	Alive or dead due to cancer
41	White	White	Female	8500	Moderately differentiated; Grade II	HR-/HER2- (Triple Negative)	Negative	Negative	Negative	T3	N3a	M1	IV	Separated	Insured/No specifics	No	Yes	Yes	0	Dead	1	Breast	Dead (attributable to this cancer dx)	Alive or dead due to cancer
56	White	White	Female	8500	Well differentiated; Grade I	HR+/HER2- (Luminal A)	Positive	Positive	Negative	T4a	N1	M1	IV	Divorced	Any Medicaid	No	Yes	Yes	0	Dead	15	Breast	Dead (attributable to this cancer dx)	Alive or dead due to cancer
48	White	White	Female	8500	Poorly differentiated; Grade III	HR-/HER2+ (HER2 enriched)	Negative	Negative	Positive	T4a	N1	M1	IV	Married (including common law)	Insured/No specifics	No	Yes	Yes	22	Dead	19	Breast	Dead (attributable to this cancer dx)	Alive or dead due to cancer
83	White	White	Female	8500	Moderately differentiated; Grade II	HR+/HER2- (Luminal A)	Positive	Positive	Negative	T3	N2NOS	M1	IV	Divorced	Insured	No	Yes	Yes	51	Dead	8	Breast	Dead (attributable to this cancer dx)	Alive or dead due to cancer
46	White	White	Female	8201	Unknown	HR-/HER2- (Triple Negative)	Negative	Negative	Negative	T4d	N1a	M1	IV	Married (including common law)	Insured	No	No	No	0	Dead	43	Diseases of Heart	Alive or dead of other cause	Dead (attributable to causes other than this cancer dx)
76	White	White	Female	8520	Moderately differentiated; Grade II	HR+/HER2+ (Luminal B)	Positive	Positive	Positive	T4b	N1	M1	IV	Divorced	Insured	No	Yes	No	0	Alive	65	Alive	Alive or dead of other cause	Alive or dead due to cancer
70	White	White	Male	8500	Moderately differentiated; Grade II	HR+/HER2- (Luminal A)	Positive	Positive	Negative	T4c	N1	M1	IV	Single (never married)	Any Medicaid	No	Yes	Yes	0	Dead	5	Breast	Dead (attributable to this cancer dx)	Alive or dead due to cancer
43	White	White	Female	8530	Moderately differentiated; Grade II	HR+/HER2- (Luminal A)	Positive	Positive	Negative	T4d	N1	M1	IV	Married (including common law)	Insured	No	No	Yes	0	Dead	56	Breast	Dead (attributable to this cancer dx)	Alive or dead due to cancer
71	White	White	Male	8522	Moderately differentiated; Grade II	HR+/HER2- (Luminal A)	Positive	Positive	Negative	T2	N0	M1	IV	Married (including common law)	Insured/No specifics	No	Yes	Yes	22	Alive	61	Alive	Alive or dead of other cause	Alive or dead due to cancer
47	White	White	Female	8500	Moderately differentiated; Grade II	HR-/HER2- (Triple Negative)	Negative	Negative	Negative	T4b	N3a	M1	IV	Divorced	Any Medicaid	Yes	No	Yes	0	Dead	5	Breast	Dead (attributable to this cancer dx)	Alive or dead due to cancer
71	White	White	Female	8500	Poorly differentiated; Grade III	HR+/HER2- (Luminal A)	Positive	Positive	Negative	T1c	N3c	M1	IV	Widowed	Insured	No	No	No	0	Dead	13	Breast	Dead (attributable to this cancer dx)	Alive or dead due to cancer
54	White	White	Female	8500	Poorly differentiated; Grade III	HR+/HER2+ (Luminal B)	Positive	Positive	Positive	T4d	N3NOS	M1	IV	Married (including common law)	Insured	No	No	No	0	Dead	57	Breast	Dead (attributable to this cancer dx)	Alive or dead due to cancer
72	White	White	Female	8500	Poorly differentiated; Grade III	HR+/HER2- (Luminal A)	Positive	Positive	Negative	T2	N0	M1	IV	Single (never married)	Insured	No	No	No	0	Dead	14	Breast	Dead (attributable to this cancer dx)	Alive or dead due to cancer
92	White	White	Female	8500	Moderately differentiated; Grade II	HR+/HER2- (Luminal A)	Positive	Positive	Negative	T4a	N1	M1	IV	Widowed	Insured	No	No	No	0	Dead	35	Breast	Dead (attributable to this cancer dx)	Alive or dead due to cancer
38	White	White	Female	8522	Moderately differentiated; Grade II	HR+/HER2- (Luminal A)	Positive	Positive	Negative	T1c	N0	M1	IV	Married (including common law)	Insured	No	No	No	0	Dead	63	Breast	Dead (attributable to this cancer dx)	Alive or dead due to cancer
64	White	White	Female	8500	Poorly differentiated; Grade III	HR-/HER2- (Triple Negative)	Negative	Negative	Negative	T1c	N1	M1	IV	Married (including common law)	Insured	No	No	No	0	Dead	14	Breast	Dead (attributable to this cancer dx)	Alive or dead due to cancer
40	White	White	Female	8520	Moderately differentiated; Grade II	HR+/HER2- (Luminal A)	Positive	Positive	Negative	T3	N1	M1	IV	Divorced	Insured/No specifics	No	No	No	0	Dead	35	Breast	Dead (attributable to this cancer dx)	Alive or dead due to cancer
59	White	White	Female	8201	Moderately differentiated; Grade II	HR+/HER2- (Luminal A)	Positive	Positive	Negative	T2	N1a	M1	IV	Married (including common law)	Any Medicaid	No	No	No	51	Dead	53	Aortic Aneurysm and Dissection	Alive or dead of other cause	Dead (attributable to causes other than this cancer dx)
70	White	White	Female	8500	Poorly differentiated; Grade III	HR+/HER2- (Luminal A)	Positive	Positive	Negative	T2	N2a	M1	IV	Married (including common law)	Insured	No	Yes	No	51	Dead	22	Breast	Dead (attributable to this cancer dx)	Alive or dead due to cancer
47	White	White	Female	8523	Moderately differentiated; Grade II	HR+/HER2- (Luminal A)	Positive	Positive	Negative	T2	N1	M1	IV	Single (never married)	Insured	No	No	No	0	Alive	61	Alive	Alive or dead of other cause	Alive or dead due to cancer
68	White	White	Female	8500	Poorly differentiated; Grade III	HR-/HER2- (Triple Negative)	Negative	Negative	Negative	T3	N1	M1	IV	Married (including common law)	Insured	Yes	No	Yes	0	Dead	6	Breast	Dead (attributable to this cancer dx)	Alive or dead due to cancer
74	White	White	Female	8500	Poorly differentiated; Grade III	HR+/HER2- (Luminal A)	Positive	Positive	Negative	T2	N2b	M1	IV	Married (including common law)	Insured/No specifics	No	No	No	0	Alive	63	Alive	Alive or dead of other cause	Alive or dead due to cancer
60	White	White	Female	8520	Poorly differentiated; Grade III	HR+/HER2- (Luminal A)	Positive	Positive	Negative	T2	N0	M1	IV	Single (never married)	Insured/No specifics	No	No	No	0	Alive	62	Alive	Alive or dead of other cause	Alive or dead due to cancer
52	White	White	Female	8500	Moderately differentiated; Grade II	HR+/HER2- (Luminal A)	Positive	Positive	Negative	T2	N1	M1	IV	Single (never married)	Insured	No	No	Yes	0	Alive	67	Alive	Alive or dead of other cause	Alive or dead due to cancer
77	White	White	Female	8500	Well differentiated; Grade I	HR+/HER2- (Luminal A)	Positive	Positive	Negative	T4b	N1	M1	IV	Widowed	Insured/No specifics	No	No	No	41	Dead	37	Pneumonia and Influenza	Alive or dead of other cause	Dead (attributable to causes other than this cancer dx)
71	White	White	Female	8520	Well differentiated; Grade I	HR+/HER2- (Luminal A)	Positive	Negative	Negative	T2	N2NOS	M1	IV	Married (including common law)	Insured	No	No	No	0	Dead	26	Breast	Dead (attributable to this cancer dx)	Alive or dead due to cancer
74	White	White	Female	8500	Poorly differentiated; Grade III	HR-/HER2+ (HER2 enriched)	Negative	Negative	Positive	T2	N0	M1	IV	Widowed	Insured	No	No	Yes	0	Dead	2	Breast	Dead (attributable to this cancer dx)	Alive or dead due to cancer
69	White	White	Female	8522	Poorly differentiated; Grade III	HR-/HER2- (Triple Negative)	Negative	Negative	Negative	T2	N1	M1	IV	Married (including common law)	Insured	No	No	No	0	Dead	2	Breast	Dead (attributable to this cancer dx)	Alive or dead due to cancer
84	White	White	Female	8520	Poorly differentiated; Grade III	HR-/HER2+ (HER2 enriched)	Negative	Negative	Positive	T1c	N0	M1	IV	Widowed	Insured	No	No	No	0	Dead	3	Breast	Dead (attributable to this cancer dx)	Alive or dead due to cancer
74	White	White	Female	8522	Moderately differentiated; Grade II	HR+/HER2- (Luminal A)	Positive	Positive	Negative	T3	N0	M1	IV	Married (including common law)	Insured	No	No	No	0	Dead	38	Breast	Dead (attributable to this cancer dx)	Alive or dead due to cancer
63	White	White	Female	8500	Poorly differentiated; Grade III	HR+/HER2- (Luminal A)	Positive	Positive	Negative	T2	N1a	M1	IV	Married (including common law)	Insured/No specifics	No	No	No	22	Dead	56	Breast	Dead (attributable to this cancer dx)	Alive or dead due to cancer
90	White	White	Female	8500	Unknown	HR+/HER2- (Luminal A)	Positive	Positive	Negative	T2	N1a	M1	IV	Widowed	Insured	No	No	Yes	22	Alive	73	Alive	Alive or dead of other cause	Alive or dead due to cancer
47	White	White	Female	8500	Well differentiated; Grade I	HR+/HER2- (Luminal A)	Positive	Positive	Negative	T2	N1	M1	IV	Married (including common law)	Insured/No specifics	No	No	Yes	0	Alive	56	Alive	Alive or dead of other cause	Alive or dead due to cancer
54	White	White	Female	8500	Poorly differentiated; Grade III	HR+/HER2- (Luminal A)	Positive	Positive	Negative	T4b	N1	M1	IV	Single (never married)	Any Medicaid	No	No	No	0	Dead	39	Breast	Dead (attributable to this cancer dx)	Alive or dead due to cancer
58	White	White	Female	8500	Moderately differentiated; Grade II	HR-/HER2+ (HER2 enriched)	Negative	Negative	Positive	T3	N1	M1	IV	Divorced	Any Medicaid	No	Yes	No	0	Alive	57	Alive	Alive or dead of other cause	Alive or dead due to cancer
74	White	White	Female	8500	Poorly differentiated; Grade III	HR+/HER2- (Luminal A)	Positive	Positive	Negative	T4b	N0	M1	IV	Married (including common law)	Insured	No	No	No	0	Dead	8	Breast	Dead (attributable to this cancer dx)	Alive or dead due to cancer
63	White	White	Female	8500	Moderately differentiated; Grade II	HR+/HER2- (Luminal A)	Positive	Positive	Negative	T4NOS	N1	M1	IV	Single (never married)	Any Medicaid	No	No	No	0	Alive	59	Alive	Alive or dead of other cause	Alive or dead due to cancer
55	Black	Black	Female	8523	Poorly differentiated; Grade III	HR+/HER2- (Luminal A)	Positive	Negative	Negative	T2	N3b	M1	IV	Single (never married)	Uninsured	No	No	No	50	Dead	14	Breast	Dead (attributable to this cancer dx)	Alive or dead due to cancer
63	White	White	Female	8500	Poorly differentiated; Grade III	HR+/HER2+ (Luminal B)	Positive	Negative	Positive	T2	N1	M1	IV	Married (including common law)	Insured/No specifics	No	No	No	22	Alive	50	Alive	Alive or dead of other cause	Alive or dead due to cancer
49	White	White	Female	8500	Moderately differentiated; Grade II	HR+/HER2- (Luminal A)	Positive	Positive	Negative	T1c	N1	M1	IV	Single (never married)	Insured/No specifics	No	No	No	0	Dead	41	Breast	Dead (attributable to this cancer dx)	Alive or dead due to cancer
51	White	White	Female	8500	Poorly differentiated; Grade III	HR-/HER2+ (HER2 enriched)	Negative	Negative	Positive	T3	N3a	M1	IV	Married (including common law)	Insured	Yes	No	No	0	Alive	48	Alive	Alive or dead of other cause	Alive or dead due to cancer
58	Black	Black	Female	8500	Poorly differentiated; Grade III	HR-/HER2- (Triple Negative)	Negative	Negative	Negative	T4b	N3b	M1	IV	Divorced	Any Medicaid	Yes	Yes	Yes	41	Dead	12	Breast	Dead (attributable to this cancer dx)	Alive or dead due to cancer
66	White	White	Female	8520	Moderately differentiated; Grade II	HR+/HER2- (Luminal A)	Positive	Positive	Negative	T2	N0	M1	IV	Single (never married)	Insured	No	Yes	No	0	Dead	19	Breast	Dead (attributable to this cancer dx)	Alive or dead due to cancer
57	White	White	Female	8500	Poorly differentiated; Grade III	HR+/HER2- (Luminal A)	Positive	Positive	Negative	T4b	N1	M1	IV	Single (never married)	Insured	No	No	No	0	Dead	21	Breast	Dead (attributable to this cancer dx)	Alive or dead due to cancer
73	White	White	Female	8480	Poorly differentiated; Grade III	HR+/HER2- (Luminal A)	Positive	Positive	Negative	T3	N0	M1	IV	Widowed	Insured/No specifics	No	No	No	0	Dead	47	Breast	Dead (attributable to this cancer dx)	Alive or dead due to cancer
42	White	White	Female	8500	Moderately differentiated; Grade II	HR+/HER2- (Luminal A)	Positive	Positive	Negative	T2	N0	M1	IV	Married (including common law)	Insured	No	No	No	0	Alive	13	Alive	Alive or dead of other cause	Alive or dead due to cancer
55	Black	Black	Female	8500	Moderately differentiated; Grade II	HR+/HER2+ (Luminal B)	Positive	Negative	Positive	T1c	N0	M1	IV	Widowed	Any Medicaid	No	No	No	0	Alive	57	Alive	Alive or dead of other cause	Alive or dead due to cancer
67	White	White	Female	8500	Moderately differentiated; Grade II	HR+/HER2+ (Luminal B)	Positive	Negative	Positive	T3	N1	M1	IV	Married (including common law)	Insured	No	No	No	0	Alive	55	Alive	Alive or dead of other cause	Alive or dead due to cancer
54	White	White	Female	8500	Poorly differentiated; Grade III	HR+/HER2- (Luminal A)	Positive	Positive	Negative	T2	N3a	M1	IV	Divorced	Insured	No	Yes	Yes	65	Dead	12	Breast	Dead (attributable to this cancer dx)	Alive or dead due to cancer
56	White	White	Female	8500	Unknown	HR+/HER2+ (Luminal B)	Positive	Negative	Positive	T3	N0	M1	IV	Married (including common law)	Insured	No	No	No	0	Alive	52	Alive	Alive or dead of other cause	Alive or dead due to cancer
34	White	White	Female	8500	Poorly differentiated; Grade III	HR+/HER2+ (Luminal B)	Positive	Positive	Positive	T2	N1	M1	IV	Married (including common law)	Insurance status unknown	No	No	No	51	Alive	50	Alive	Alive or dead of other cause	Alive or dead due to cancer
77	White	White	Female	8500	Poorly differentiated; Grade III	HR+/HER2- (Luminal A)	Positive	Positive	Negative	T3	N1a	M1	IV	Widowed	Insured	No	No	No	20	Dead	35	Breast	Dead (attributable to this cancer dx)	Alive or dead due to cancer
56	Black	Black	Female	8500	Moderately differentiated; Grade II	HR+/HER2+ (Luminal B)	Positive	Negative	Positive	T1c	N1	M1	IV	Single (never married)	Any Medicaid	Yes	Yes	Yes	0	Dead	1	Breast	Dead (attributable to this cancer dx)	Alive or dead due to cancer
63	White	White	Female	8522	Moderately differentiated; Grade II	HR+/HER2- (Luminal A)	Positive	Positive	Negative	T4a	N3a	M1	IV	Married (including common law)	Insured	No	No	Yes	0	Dead	25	Breast	Dead (attributable to this cancer dx)	Alive or dead due to cancer
78	White	White	Female	8500	Unknown	HR+/HER2- (Luminal A)	Positive	Positive	Negative	T4b	N2a	M1	IV	Married (including common law)	Insured	No	No	No	0	Dead	24	Breast	Dead (attributable to this cancer dx)	Alive or dead due to cancer
65	White	White	Female	8500	Poorly differentiated; Grade III	HR+/HER2- (Luminal A)	Positive	Negative	Negative	T3	N1	M1	IV	Unknown	Insured/No specifics	No	No	Yes	0	Dead	2	Breast	Dead (attributable to this cancer dx)	Alive or dead due to cancer
84	White	White	Female	8500	Poorly differentiated; Grade III	HR+/HER2- (Luminal A)	Positive	Positive	Negative	T1c	N1	M1	IV	Widowed	Insured	No	No	No	0	Dead	29	Breast	Dead (attributable to this cancer dx)	Alive or dead due to cancer
55	Black	Black	Female	8520	Moderately differentiated; Grade II	HR+/HER2- (Luminal A)	Positive	Positive	Negative	T3	N1	M1	IV	Single (never married)	Insured	No	Yes	Yes	0	Dead	21	Breast	Dead (attributable to this cancer dx)	Alive or dead due to cancer
74	White	White	Female	8500	Poorly differentiated; Grade III	HR-/HER2- (Triple Negative)	Negative	Negative	Negative	T2	N1a	M1	IV	Divorced	Any Medicaid	No	No	No	40	Dead	36	Breast	Dead (attributable to this cancer dx)	Alive or dead due to cancer
68	White	White	Male	8520	Moderately differentiated; Grade II	HR+/HER2+ (Luminal B)	Positive	Negative	Positive	T3	N0	M1	IV	Unknown	Insured	No	No	No	41	Alive	48	Alive	Alive or dead of other cause	Alive or dead due to cancer
61	Black	Black	Female	8500	Moderately differentiated; Grade II	HR+/HER2+ (Luminal B)	Positive	Negative	Positive	T2	N3a	M1	IV	Divorced	Insured	No	No	No	54	Alive	52	Alive	Alive or dead of other cause	Alive or dead due to cancer
61	White	White	Female	8520	Moderately differentiated; Grade II	HR+/HER2- (Luminal A)	Positive	Positive	Negative	T1c	N1	M1	IV	Married (including common law)	Insured	No	No	No	0	Dead	33	Breast	Dead (attributable to this cancer dx)	Alive or dead due to cancer
39	White	White	Female	8500	Moderately differentiated; Grade II	HR+/HER2- (Luminal A)	Positive	Positive	Negative	T3	N1	M1	IV	Single (never married)	Insured/No specifics	No	No	No	44	Dead	43	Breast	Dead (attributable to this cancer dx)	Alive or dead due to cancer
68	White	White	Female	8500	Poorly differentiated; Grade III	HR+/HER2- (Luminal A)	Positive	Positive	Negative	T4d	N2NOS	M1	IV	Widowed	Insured	No	No	No	51	Alive	59	Alive	Alive or dead of other cause	Alive or dead due to cancer
57	White	White	Female	8500	Moderately differentiated; Grade II	HR-/HER2- (Triple Negative)	Negative	Negative	Negative	T2	N1	M1	IV	Married (including common law)	Insured	No	No	No	0	Dead	13	Breast	Dead (attributable to this cancer dx)	Alive or dead due to cancer
55	Black	Black	Female	8500	Poorly differentiated; Grade III	HR-/HER2+ (HER2 enriched)	Negative	Negative	Positive	T4b	N0	M1	IV	Single (never married)	Insured	No	No	No	51	Dead	6	Breast	Dead (attributable to this cancer dx)	Alive or dead due to cancer
59	White	White	Female	8522	Unknown	HR+/HER2- (Luminal A)	Positive	Positive	Negative	T2	N0	M1	IV	Married (including common law)	Insured	No	No	No	0	Alive	57	Alive	Alive or dead of other cause	Alive or dead due to cancer
63	White	White	Female	8522	Poorly differentiated; Grade III	HR+/HER2- (Luminal A)	Positive	Positive	Negative	T3	N1	M1	IV	Married (including common law)	Insured	No	No	No	0	Dead	43	Breast	Dead (attributable to this cancer dx)	Alive or dead due to cancer
56	White	White	Female	8500	Moderately differentiated; Grade II	HR+/HER2- (Luminal A)	Positive	Positive	Negative	T2	N0	M1	IV	Married (including common law)	Insured	No	No	No	0	Dead	26	Breast	Dead (attributable to this cancer dx)	Alive or dead due to cancer
68	White	White	Female	8500	Poorly differentiated; Grade III	HR+/HER2- (Luminal A)	Positive	Positive	Negative	T1c	N1	M1	IV	Divorced	Insured/No specifics	No	No	No	0	Dead	47	Breast	Dead (attributable to this cancer dx)	Alive or dead due to cancer
42	Other (American Indian/AK Native, Asian/Pacific Islander)	Asian or Pacific Islander	Female	8500	Moderately differentiated; Grade II	HR+/HER2- (Luminal A)	Positive	Positive	Negative	T2	N1	M1	IV	Unmarried or Domestic Partner	Insured	No	No	No	0	Dead	29	Breast	Dead (attributable to this cancer dx)	Alive or dead due to cancer
54	Black	Black	Female	8500	Moderately differentiated; Grade II	HR-/HER2+ (HER2 enriched)	Negative	Negative	Positive	T2	N1	M1	IV	Married (including common law)	Any Medicaid	No	Yes	Yes	0	Dead	3	Breast	Dead (attributable to this cancer dx)	Alive or dead due to cancer
54	White	White	Female	8500	Well differentiated; Grade I	HR+/HER2- (Luminal A)	Positive	Positive	Negative	T2	N1	M1	IV	Married (including common law)	Uninsured	No	No	No	51	Dead	45	Breast	Dead (attributable to this cancer dx)	Alive or dead due to cancer
34	White	White	Female	8530	Poorly differentiated; Grade III	HR-/HER2+ (HER2 enriched)	Negative	Negative	Positive	T4d	N1	M1	IV	Married (including common law)	Insured/No specifics	No	No	No	0	Dead	25	Breast	Dead (attributable to this cancer dx)	Alive or dead due to cancer
57	White	White	Female	8500	Moderately differentiated; Grade II	HR+/HER2- (Luminal A)	Positive	Positive	Negative	T2	N1	M1	IV	Divorced	Insured/No specifics	No	No	No	0	Dead	21	Breast	Dead (attributable to this cancer dx)	Alive or dead due to cancer
86	White	White	Female	8500	Poorly differentiated; Grade III	HR+/HER2- (Luminal A)	Positive	Positive	Negative	T2	N1a	M1	IV	Divorced	Insured	No	No	Yes	0	Dead	35	Colon excluding Rectum	Alive or dead of other cause	Dead (attributable to causes other than this cancer dx)
41	White	White	Female	8500	Moderately differentiated; Grade II	HR+/HER2- (Luminal A)	Positive	Positive	Negative	T2	N1	M1	IV	Married (including common law)	Insured	No	No	No	52	Alive	51	Alive	Alive or dead of other cause	Alive or dead due to cancer
54	Other (American Indian/AK Native, Asian/Pacific Islander)	Asian or Pacific Islander	Female	8500	Moderately differentiated; Grade II	HR+/HER2- (Luminal A)	Positive	Positive	Negative	T4b	N1	M1	IV	Married (including common law)	Any Medicaid	No	No	No	0	Alive	1	Alive	Alive or dead of other cause	Alive or dead due to cancer
63	White	White	Female	8010	Poorly differentiated; Grade III	HR+/HER2- (Luminal A)	Positive	Positive	Negative	T4b	N2NOS	M1	IV	Married (including common law)	Insured	No	No	No	0	Dead	28	Breast	Dead (attributable to this cancer dx)	Alive or dead due to cancer
52	White	White	Female	8500	Poorly differentiated; Grade III	HR+/HER2+ (Luminal B)	Positive	Positive	Positive	T2	N0	M1	IV	Single (never married)	Any Medicaid	No	No	No	0	Dead	30	Breast	Dead (attributable to this cancer dx)	Alive or dead due to cancer
76	White	White	Female	8500	Poorly differentiated; Grade III	HR-/HER2+ (HER2 enriched)	Negative	Negative	Positive	T1c	N3a	M1	IV	Single (never married)	Insured	No	No	No	20	Alive	48	Alive	Alive or dead of other cause	Alive or dead due to cancer
67	White	White	Female	8500	Unknown	HR+/HER2+ (Luminal B)	Positive	Negative	Positive	T1c	N1mi	M1	IV	Married (including common law)	Any Medicaid	No	Yes	Yes	0	Alive	51	Alive	Alive or dead of other cause	Alive or dead due to cancer
65	White	White	Female	8520	Unknown	HR+/HER2- (Luminal A)	Positive	Positive	Negative	T1c	N0	M1	IV	Widowed	Insured	No	No	No	0	Alive	49	Alive	Alive or dead of other cause	Alive or dead due to cancer
49	White	White	Female	8500	Unknown	HR+/HER2- (Luminal A)	Positive	Positive	Negative	T2	N1	M1	IV	Married (including common law)	Any Medicaid	No	Yes	No	0	Dead	14	Breast	Dead (attributable to this cancer dx)	Alive or dead due to cancer
63	Black	Black	Female	8500	Well differentiated; Grade I	HR+/HER2- (Luminal A)	Positive	Positive	Negative	T2	N0	M1	IV	Widowed	Uninsured	No	No	No	0	Alive	49	Alive	Alive or dead of other cause	Alive or dead due to cancer
92	Black	Black	Female	8500	Moderately differentiated; Grade II	HR+/HER2- (Luminal A)	Positive	Positive	Negative	T2	N1	M1	IV	Widowed	Insured/No specifics	No	No	No	0	Dead	1	Cerebrovascular Diseases	Alive or dead of other cause	Dead (attributable to causes other than this cancer dx)
73	White	White	Female	8500	Poorly differentiated; Grade III	HR-/HER2+ (HER2 enriched)	Negative	Negative	Positive	T3	N1	M1	IV	Married (including common law)	Insured	No	Yes	No	0	Dead	18	Breast	Dead (attributable to this cancer dx)	Alive or dead due to cancer
64	White	White	Female	8500	Well differentiated; Grade I	HR+/HER2- (Luminal A)	Positive	Positive	Negative	T2	N1	M1	IV	Married (including common law)	Insured/No specifics	No	No	No	0	Alive	49	Alive	Alive or dead of other cause	Alive or dead due to cancer
69	White	White	Female	8500	Well differentiated; Grade I	HR+/HER2- (Luminal A)	Positive	Negative	Negative	T3	N3a	M1	IV	Married (including common law)	Insured/No specifics	No	No	No	20	Dead	45	Breast	Dead (attributable to this cancer dx)	Alive or dead due to cancer
91	White	White	Female	8522	Unknown	HR+/HER2- (Luminal A)	Positive	Positive	Negative	T2	N0	M1	IV	Married (including common law)	Insured	No	No	No	0	Dead	36	Diseases of Heart	Alive or dead of other cause	Dead (attributable to causes other than this cancer dx)
66	White	White	Female	8500	Moderately differentiated; Grade II	HR+/HER2- (Luminal A)	Positive	Positive	Negative	T4b	N1	M1	IV	Divorced	Insured/No specifics	No	No	Yes	0	Alive	47	Alive	Alive or dead of other cause	Alive or dead due to cancer
63	Unknown	Unknown	Female	8524	Poorly differentiated; Grade III	HR-/HER2- (Triple Negative)	Negative	Negative	Negative	T3	N0	M1	IV	Married (including common law)	Insured	No	No	No	0	Alive	46	Alive	Alive or dead of other cause	Alive or dead due to cancer
59	White	White	Female	8500	Poorly differentiated; Grade III	HR-/HER2+ (HER2 enriched)	Negative	Negative	Positive	T2	N0	M1	IV	Married (including common law)	Insured	No	No	No	99	Dead	42	Breast	Dead (attributable to this cancer dx)	Alive or dead due to cancer
58	Black	Black	Female	8500	Poorly differentiated; Grade III	HR+/HER2+ (Luminal B)	Positive	Negative	Positive	T1b	N2a	M1	IV	Single (never married)	Any Medicaid	No	No	No	51	Dead	32	Breast	Dead (attributable to this cancer dx)	Alive or dead due to cancer
61	White	White	Female	8500	Moderately differentiated; Grade II	HR+/HER2- (Luminal A)	Positive	Positive	Negative	T3	N0	M1	IV	Single (never married)	Any Medicaid	No	No	No	0	Dead	6	Other Infectious and Parasitic Diseases including HIV	Alive or dead of other cause	Dead (attributable to causes other than this cancer dx)
51	White	White	Female	8500	Poorly differentiated; Grade III	HR+/HER2- (Luminal A)	Positive	Positive	Negative	T1c	N3a	M1	IV	Married (including common law)	Insured	No	No	No	54	Dead	44	Breast	Dead (attributable to this cancer dx)	Alive or dead due to cancer
61	White	White	Female	8500	Moderately differentiated; Grade II	HR+/HER2- (Luminal A)	Positive	Positive	Negative	T2	N1	M1	IV	Widowed	Insured	No	No	Yes	0	Alive	40	Alive	Alive or dead of other cause	Alive or dead due to cancer
66	White	White	Female	8520	Moderately differentiated; Grade II	HR+/HER2- (Luminal A)	Positive	Positive	Negative	T3	N3a	M1	IV	Married (including common law)	Insured	No	No	No	59	Dead	30	Breast	Dead (attributable to this cancer dx)	Alive or dead due to cancer
62	Black	Black	Female	8500	Moderately differentiated; Grade II	HR+/HER2- (Luminal A)	Positive	Positive	Negative	T2	N1	M1	IV	Widowed	Any Medicaid	No	Yes	Yes	0	Dead	7	Diseases of Heart	Alive or dead of other cause	Dead (attributable to causes other than this cancer dx)
50	Black	Black	Female	8500	Poorly differentiated; Grade III	HR+/HER2- (Luminal A)	Positive	Positive	Negative	T1c	N1	M1	IV	Single (never married)	Insured	No	No	No	0	Dead	46	Septicemia	Alive or dead of other cause	Dead (attributable to causes other than this cancer dx)
75	White	White	Female	8500	Moderately differentiated; Grade II	HR+/HER2- (Luminal A)	Positive	Positive	Negative	T4c	N2a	M1	IV	Single (never married)	Insured/No specifics	Yes	Yes	No	0	Alive	43	Alive	Alive or dead of other cause	Alive or dead due to cancer
60	White	White	Female	8500	Well differentiated; Grade I	HR+/HER2- (Luminal A)	Positive	Positive	Negative	T1b	N1	M1	IV	Married (including common law)	Any Medicaid	No	No	No	0	Alive	40	Alive	Alive or dead of other cause	Alive or dead due to cancer
63	Black	Black	Female	8500	Poorly differentiated; Grade III	HR+/HER2- (Luminal A)	Positive	Negative	Negative	T3	N2a	M1	IV	Divorced	Any Medicaid	No	No	No	0	Dead	14	Breast	Dead (attributable to this cancer dx)	Alive or dead due to cancer
37	White	White	Female	8500	Poorly differentiated; Grade III	HR-/HER2+ (HER2 enriched)	Negative	Negative	Positive	T2	N1	M1	IV	Divorced	Insured	No	Yes	No	0	Alive	44	Alive	Alive or dead of other cause	Alive or dead due to cancer
53	White	White	Female	8500	Poorly differentiated; Grade III	HR+/HER2+ (Luminal B)	Positive	Positive	Positive	T4b	N2NOS	M1	IV	Divorced	Insured	No	Yes	Yes	0	Alive	43	Alive	Alive or dead of other cause	Alive or dead due to cancer
73	White	White	Female	8500	Poorly differentiated; Grade III	HR+/HER2+ (Luminal B)	Positive	Negative	Positive	T4a	N2a	M1	IV	Divorced	Insured/No specifics	No	No	No	0	Alive	44	Alive	Alive or dead of other cause	Alive or dead due to cancer
75	Black	Black	Female	8500	Poorly differentiated; Grade III	HR-/HER2- (Triple Negative)	Negative	Negative	Negative	T1c	N1	M1	IV	Married (including common law)	Any Medicaid	No	No	No	0	Dead	11	Breast	Dead (attributable to this cancer dx)	Alive or dead due to cancer
81	White	White	Female	8522	Well differentiated; Grade I	HR+/HER2- (Luminal A)	Positive	Positive	Negative	T3	N3a	M1	IV	Divorced	Any Medicaid	No	No	No	51	Alive	40	Alive	Alive or dead of other cause	Alive or dead due to cancer
66	White	White	Female	8500	Moderately differentiated; Grade II	HR+/HER2- (Luminal A)	Positive	Negative	Negative	T2	N1	M1	IV	Married (including common law)	Insured/No specifics	No	No	No	0	Alive	39	Alive	Alive or dead of other cause	Alive or dead due to cancer
56	White	White	Female	8500	Unknown	HR+/HER2- (Luminal A)	Positive	Negative	Negative	T4a	N1	M1	IV	Married (including common law)	Insured	No	No	Yes	0	Dead	19	Breast	Dead (attributable to this cancer dx)	Alive or dead due to cancer
61	White	White	Male	8500	Moderately differentiated; Grade II	HR+/HER2- (Luminal A)	Positive	Positive	Negative	T4b	N1	M1	IV	Single (never married)	Any Medicaid	No	No	Yes	0	Alive	13	Alive	Alive or dead of other cause	Alive or dead due to cancer
39	White	White	Female	8500	Unknown	HR+/HER2- (Luminal A)	Positive	Negative	Negative	T4d	N3c	M1	IV	Single (never married)	Insured	Yes	Yes	Yes	0	Dead	34	Breast	Dead (attributable to this cancer dx)	Alive or dead due to cancer
75	Black	Black	Female	8480	Unknown	HR+/HER2- (Luminal A)	Positive	Positive	Negative	T4b	N2a	M1	IV	Single (never married)	Any Medicaid	No	No	Yes	0	Dead	1	Other Cause of Death	Alive or dead of other cause	Dead (attributable to causes other than this cancer dx)
88	White	White	Female	8500	Moderately differentiated; Grade II	HR+/HER2- (Luminal A)	Positive	Positive	Negative	T2	N0	M1	IV	Widowed	Any Medicaid	No	No	No	0	Dead	18	Breast	Dead (attributable to this cancer dx)	Alive or dead due to cancer
90	White	White	Female	8500	Poorly differentiated; Grade III	HR+/HER2- (Luminal A)	Positive	Positive	Negative	T4b	N1a	M1	IV	Widowed	Insured	No	No	Yes	41	Dead	12	Breast	Dead (attributable to this cancer dx)	Alive or dead due to cancer
78	White	White	Female	8140	Unknown	HR+/HER2- (Luminal A)	Positive	Negative	Negative	T4b	N0	M1	IV	Unknown	Insured	No	No	No	0	Alive	45	Alive	Alive or dead of other cause	Alive or dead due to cancer
54	White	White	Female	8523	Poorly differentiated; Grade III	HR+/HER2- (Luminal A)	Positive	Positive	Negative	T2	N1a	M1	IV	Single (never married)	Insured	No	No	No	24	Alive	36	Alive	Alive or dead of other cause	Alive or dead due to cancer
66	White	White	Female	8500	Moderately differentiated; Grade II	HR+/HER2- (Luminal A)	Positive	Positive	Negative	T3	N3b	M1	IV	Divorced	Insured	No	No	No	0	Dead	13	Breast	Dead (attributable to this cancer dx)	Alive or dead due to cancer
52	White	White	Female	8500	Unknown	HR-/HER2+ (HER2 enriched)	Negative	Negative	Positive	T4d	N1	M1	IV	Married (including common law)	Insured	No	No	No	0	Alive	36	Alive	Alive or dead of other cause	Alive or dead due to cancer
32	White	White	Female	8500	Unknown	HR+/HER2- (Luminal A)	Positive	Positive	Negative	T2	N1	M1	IV	Widowed	Insured	No	Yes	Yes	0	Dead	37	Breast	Dead (attributable to this cancer dx)	Alive or dead due to cancer
81	White	White	Female	8500	Unknown	HR+/HER2- (Luminal A)	Positive	Negative	Negative	T2	N0	M1	IV	Widowed	Insured/No specifics	No	No	Yes	0	Dead	12	Breast	Dead (attributable to this cancer dx)	Alive or dead due to cancer
77	Unknown	Unknown	Female	8520	Unknown	HR+/HER2- (Luminal A)	Positive	Negative	Negative	T3	N1a	M1	IV	Married (including common law)	Insured	No	No	No	41	Alive	43	Alive	Alive or dead of other cause	Alive or dead due to cancer
69	White	White	Female	8500	Moderately differentiated; Grade II	HR+/HER2- (Luminal A)	Positive	Negative	Negative	T1b	N1a	M1	IV	Married (including common law)	Insured	Yes	No	No	0	Dead	12	Breast	Dead (attributable to this cancer dx)	Alive or dead due to cancer
83	Black	Black	Female	8500	Poorly differentiated; Grade III	HR-/HER2+ (HER2 enriched)	Negative	Negative	Positive	T4b	N1	M1	IV	Widowed	Insured	No	No	Yes	0	Dead	4	Breast	Dead (attributable to this cancer dx)	Alive or dead due to cancer
54	White	White	Female	8500	Moderately differentiated; Grade II	HR+/HER2+ (Luminal B)	Positive	Negative	Positive	T4b	N1	M1	IV	Single (never married)	Insured	No	Yes	No	0	Alive	37	Alive	Alive or dead of other cause	Alive or dead due to cancer
39	Black	Black	Female	8480	Well differentiated; Grade I	HR+/HER2+ (Luminal B)	Positive	Positive	Positive	T4d	N1	M1	IV	Married (including common law)	Uninsured	No	No	Yes	0	Alive	4	Alive	Alive or dead of other cause	Alive or dead due to cancer
86	White	White	Female	8500	Moderately differentiated; Grade II	HR+/HER2- (Luminal A)	Positive	Positive	Negative	T2	N0	M1	IV	Widowed	Insured	No	No	No	41	Alive	46	Alive	Alive or dead of other cause	Alive or dead due to cancer
67	White	White	Female	8522	Moderately differentiated; Grade II	HR+/HER2- (Luminal A)	Positive	Positive	Negative	T2	N0	M1	IV	Married (including common law)	Insured	No	No	Yes	0	Alive	40	Alive	Alive or dead of other cause	Alive or dead due to cancer
95	White	White	Female	8520	Moderately differentiated; Grade II	HR-/HER2- (Triple Negative)	Negative	Negative	Negative	T4b	N1	M1	IV	Widowed	Any Medicaid	No	Yes	No	0	Dead	2	Breast	Dead (attributable to this cancer dx)	Alive or dead due to cancer
81	White	White	Female	8140	Unknown	HR+/HER2+ (Luminal B)	Positive	Negative	Positive	T3	N3c	M1	IV	Married (including common law)	Insured	No	No	No	0	Dead	9	Breast	Dead (attributable to this cancer dx)	Alive or dead due to cancer
61	White	White	Female	8523	Unknown	HR+/HER2- (Luminal A)	Positive	Positive	Negative	T2	N1	M1	IV	Married (including common law)	Insured	No	Yes	Yes	0	Dead	30	Chronic Obstructive Pulmonary Disease and Allied Cond	Alive or dead of other cause	Dead (attributable to causes other than this cancer dx)
34	White	White	Female	8522	Poorly differentiated; Grade III	HR-/HER2- (Triple Negative)	Negative	Negative	Negative	T2	N1	M1	IV	Married (including common law)	Insured	No	No	No	0	Dead	5	Complications of Pregnancy, Childbirth, Puerperium	Alive or dead of other cause	Dead (attributable to causes other than this cancer dx)
61	Black	Black	Female	8530	Unknown	HR-/HER2- (Triple Negative)	Negative	Negative	Negative	T4d	N1	M1	IV	Single (never married)	Insured	No	No	Yes	22	Dead	9	Breast	Dead (attributable to this cancer dx)	Alive or dead due to cancer
76	White	White	Female	8500	Moderately differentiated; Grade II	HR+/HER2- (Luminal A)	Positive	Positive	Negative	T2	N1	M1	IV	Divorced	Any Medicaid	No	No	No	0	Alive	47	Alive	Alive or dead of other cause	Alive or dead due to cancer
57	White	White	Female	8500	Poorly differentiated; Grade III	HR+/HER2+ (Luminal B)	Positive	Positive	Positive	T2	N1	M1	IV	Married (including common law)	Any Medicaid	No	Yes	No	0	Dead	41	Breast	Dead (attributable to this cancer dx)	Alive or dead due to cancer
27	White	White	Female	8500	Poorly differentiated; Grade III	HR+/HER2+ (Luminal B)	Positive	Positive	Positive	T4b	N1	M1	IV	Unknown	Insured	No	Yes	No	99	Dead	25	Breast	Dead (attributable to this cancer dx)	Alive or dead due to cancer
48	White	White	Female	8500	Poorly differentiated; Grade III	HR+/HER2+ (Luminal B)	Positive	Positive	Positive	T4b	N1	M1	IV	Married (including common law)	Any Medicaid	Yes	Yes	Yes	0	Dead	4	Breast	Dead (attributable to this cancer dx)	Alive or dead due to cancer
68	White	White	Female	8500	Moderately differentiated; Grade II	HR+/HER2- (Luminal A)	Positive	Positive	Negative	T2	N1NOS	M1	IV	Divorced	Insured/No specifics	No	No	No	0	Alive	36	Alive	Alive or dead of other cause	Alive or dead due to cancer
61	White	White	Female	8500	Poorly differentiated; Grade III	HR-/HER2+ (HER2 enriched)	Negative	Negative	Positive	T4b	N1	M1	IV	Married (including common law)	Insured/No specifics	No	No	Yes	0	Alive	36	Alive	Alive or dead of other cause	Alive or dead due to cancer
37	White	White	Female	8520	Well differentiated; Grade I	HR+/HER2- (Luminal A)	Positive	Positive	Negative	T1b	N1	M1	IV	Married (including common law)	Insured	No	No	Yes	0	Dead	40	Breast	Dead (attributable to this cancer dx)	Alive or dead due to cancer
64	White	White	Female	8520	Unknown	HR+/HER2- (Luminal A)	Positive	Positive	Negative	T4a	N1	M1	IV	Married (including common law)	Insured	No	No	No	0	Dead	14	Breast	Dead (attributable to this cancer dx)	Alive or dead due to cancer
38	White	White	Female	8500	Poorly differentiated; Grade III	HR-/HER2- (Triple Negative)	Negative	Negative	Negative	T3	N3NOS	M1	IV	Single (never married)	Insured/No specifics	No	No	No	0	Dead	13	Complications of Pregnancy, Childbirth, Puerperium	Alive or dead of other cause	Dead (attributable to causes other than this cancer dx)
77	White	White	Female	8520	Moderately differentiated; Grade II	HR+/HER2- (Luminal A)	Positive	Positive	Negative	T4a	N1	M1	IV	Divorced	Insured	No	No	No	0	Alive	32	Alive	Alive or dead of other cause	Alive or dead due to cancer
58	Black	Black	Female	8520	Poorly differentiated; Grade III	HR+/HER2- (Luminal A)	Positive	Positive	Negative	T4b	N0	M1	IV	Single (never married)	Any Medicaid	No	No	No	0	Alive	28	Alive	Alive or dead of other cause	Alive or dead due to cancer
58	Black	Black	Female	8401	Poorly differentiated; Grade III	HR-/HER2- (Triple Negative)	Negative	Negative	Negative	T2	N1	M1	IV	Married (including common law)	Insured	No	Yes	No	0	Dead	3	Breast	Dead (attributable to this cancer dx)	Alive or dead due to cancer
53	White	White	Female	8522	Moderately differentiated; Grade II	HR+/HER2+ (Luminal B)	Positive	Positive	Positive	T4NOS	N1	M1	IV	Single (never married)	Uninsured	No	No	Yes	0	Alive	31	Alive	Alive or dead of other cause	Alive or dead due to cancer
83	Unknown	Unknown	Female	8500	Moderately differentiated; Grade II	HR+/HER2- (Luminal A)	Positive	Positive	Negative	T3	N2NOS	M1	IV	Widowed	Insured	No	No	No	0	Dead	1	Breast	Dead (attributable to this cancer dx)	Alive or dead due to cancer
55	White	White	Female	8500	Poorly differentiated; Grade III	HR+/HER2+ (Luminal B)	Positive	Positive	Positive	T2	N3a	M1	IV	Married (including common law)	Insured	No	Yes	Yes	0	Dead	25	Breast	Dead (attributable to this cancer dx)	Alive or dead due to cancer
53	Black	Black	Female	8500	Well differentiated; Grade I	HR+/HER2- (Luminal A)	Positive	Positive	Negative	T4a	N1	M1	IV	Single (never married)	Insured/No specifics	No	No	No	0	Dead	30	Breast	Dead (attributable to this cancer dx)	Alive or dead due to cancer
74	White	White	Female	8520	Moderately differentiated; Grade II	HR+/HER2- (Luminal A)	Positive	Positive	Negative	T3	N1	M1	IV	Married (including common law)	Insured	No	No	No	0	Alive	23	Alive	Alive or dead of other cause	Alive or dead due to cancer
57	White	White	Female	8500	Poorly differentiated; Grade III	HR+/HER2- (Luminal A)	Positive	Positive	Negative	T4b	N1	M1	IV	Divorced	Any Medicaid	No	No	Yes	0	Alive	28	Alive	Alive or dead of other cause	Alive or dead due to cancer
63	White	White	Female	8500	Poorly differentiated; Grade III	HR+/HER2- (Luminal A)	Positive	Positive	Negative	T4b	N2a	M1	IV	Married (including common law)	Insured	No	No	Yes	51	Alive	33	Alive	Alive or dead of other cause	Alive or dead due to cancer
88	White	White	Female	8500	Unknown	HR+/HER2- (Luminal A)	Positive	Negative	Negative	T4d	N1	M1	IV	Widowed	Insured/No specifics	No	No	No	0	Dead	2	Breast	Dead (attributable to this cancer dx)	Alive or dead due to cancer
48	Black	Black	Female	8500	Moderately differentiated; Grade II	HR+/HER2- (Luminal A)	Positive	Positive	Negative	T3	N1mi	M1	IV	Married (including common law)	Insured	No	Yes	Yes	0	Dead	19	Breast	Dead (attributable to this cancer dx)	Alive or dead due to cancer
78	White	White	Female	8500	Unknown	HR+/HER2- (Luminal A)	Positive	Positive	Negative	T4b	N1	M1	IV	Married (including common law)	Insured	No	No	No	0	Dead	19	Breast	Dead (attributable to this cancer dx)	Alive or dead due to cancer
48	White	White	Female	8500	Poorly differentiated; Grade III	HR-/HER2+ (HER2 enriched)	Negative	Negative	Positive	T3	N1	M1	IV	Married (including common law)	Insured	No	Yes	No	0	Alive	30	Alive	Alive or dead of other cause	Alive or dead due to cancer
83	White	White	Female	8520	Moderately differentiated; Grade II	HR+/HER2- (Luminal A)	Positive	Positive	Negative	T1c	N1	M1	IV	Married (including common law)	Insured/No specifics	No	No	No	0	Dead	29	Breast	Dead (attributable to this cancer dx)	Alive or dead due to cancer
47	Black	Black	Female	8500	Poorly differentiated; Grade III	HR+/HER2- (Luminal A)	Positive	Negative	Negative	T4a	N2a	M1	IV	Single (never married)	Any Medicaid	No	No	No	48	Alive	33	Alive	Alive or dead of other cause	Alive or dead due to cancer
60	White	White	Female	8500	Moderately differentiated; Grade II	HR+/HER2- (Luminal A)	Positive	Positive	Negative	T2	N1	M1	IV	Unknown	Insured/No specifics	No	No	No	0	Alive	24	Alive	Alive or dead of other cause	Alive or dead due to cancer
54	Black	Black	Female	8520	Moderately differentiated; Grade II	HR+/HER2- (Luminal A)	Positive	Positive	Negative	T4b	N2a	M1	IV	Single (never married)	Any Medicaid	No	No	No	0	Alive	27	Alive	Alive or dead of other cause	Alive or dead due to cancer
67	White	White	Female	8522	Poorly differentiated; Grade III	HR-/HER2+ (HER2 enriched)	Negative	Negative	Positive	T2	N0	M1	IV	Widowed	Insured	Yes	Yes	No	0	Dead	12	Breast	Dead (attributable to this cancer dx)	Alive or dead due to cancer
47	White	White	Female	8500	Poorly differentiated; Grade III	HR-/HER2- (Triple Negative)	Negative	Negative	Negative	T2	N0	M1	IV	Single (never married)	Any Medicaid	No	No	Yes	0	Dead	16	Breast	Dead (attributable to this cancer dx)	Alive or dead due to cancer
56	White	White	Female	8140	Moderately differentiated; Grade II	HR+/HER2- (Luminal A)	Positive	Borderline	Negative	T2	N1	M1	IV	Single (never married)	Any Medicaid	No	No	No	0	Dead	6	Chronic Obstructive Pulmonary Disease and Allied Cond	Alive or dead of other cause	Dead (attributable to causes other than this cancer dx)
60	White	White	Female	8500	Unknown	HR-/HER2- (Triple Negative)	Negative	Negative	Negative	T4b	N1	M1	IV	Married (including common law)	Insured	No	No	No	0	Dead	4	Breast	Dead (attributable to this cancer dx)	Alive or dead due to cancer
65	White	White	Female	8500	Well differentiated; Grade I	HR+/HER2- (Luminal A)	Positive	Positive	Negative	T2	N1	M1	IV	Divorced	Insured/No specifics	No	No	No	0	Alive	32	Alive	Alive or dead of other cause	Alive or dead due to cancer
51	White	White	Female	8530	Poorly differentiated; Grade III	HR-/HER2- (Triple Negative)	Negative	Negative	Negative	T4d	N1	M1	IV	Widowed	Insured/No specifics	No	No	Yes	51	Alive	33	Alive	Alive or dead of other cause	Alive or dead due to cancer
52	White	White	Female	8500	Unknown	HR+/HER2- (Luminal A)	Positive	Positive	Negative	T1c	N1	M1	IV	Single (never married)	Any Medicaid	Yes	Yes	No	0	Dead	3	Breast	Dead (attributable to this cancer dx)	Alive or dead due to cancer
32	White	White	Female	8522	Poorly differentiated; Grade III	HR+/HER2- (Luminal A)	Positive	Positive	Negative	T3	N1	M1	IV	Married (including common law)	Insured	No	No	No	0	Alive	26	Alive	Alive or dead of other cause	Alive or dead due to cancer
51	White	White	Female	8500	Moderately differentiated; Grade II	HR+/HER2- (Luminal A)	Positive	Positive	Negative	T4NOS	N0	M1	IV	Married (including common law)	Insured	No	No	Yes	0	Dead	17	Breast	Dead (attributable to this cancer dx)	Alive or dead due to cancer
44	Black	Black	Female	8500	Poorly differentiated; Grade III	HR-/HER2+ (HER2 enriched)	Negative	Negative	Positive	T1c	N1	M1	IV	Married (including common law)	Insured	No	Yes	Yes	0	Alive	27	Alive	Alive or dead of other cause	Alive or dead due to cancer
53	Black	Black	Female	8500	Unknown	HR+/HER2+ (Luminal B)	Positive	Positive	Positive	T4b	N1	M1	IV	Married (including common law)	Insured	No	No	No	0	Alive	27	Alive	Alive or dead of other cause	Alive or dead due to cancer
64	White	White	Female	8520	Moderately differentiated; Grade II	HR+/HER2- (Luminal A)	Positive	Borderline	Negative	T2	N1	M1	IV	Widowed	Insured/No specifics	No	No	No	0	Dead	23	Pancreas	Alive or dead of other cause	Dead (attributable to causes other than this cancer dx)
67	White	White	Female	8500	Moderately differentiated; Grade II	HR+/HER2- (Luminal A)	Positive	Positive	Negative	T4b	N0	M1	IV	Single (never married)	Insured/No specifics	Yes	No	No	0	Dead	1	Diseases of Heart	Alive or dead of other cause	Dead (attributable to causes other than this cancer dx)
49	White	White	Female	8500	Poorly differentiated; Grade III	HR+/HER2- (Luminal A)	Positive	Positive	Negative	T1b	N1NOS	M1	IV	Married (including common law)	Insured	No	No	No	0	Alive	13	Alive	Alive or dead of other cause	Alive or dead due to cancer
81	White	White	Female	8140	Unknown	HR+/HER2+ (Luminal B)	Positive	Positive	Positive	T2	N0	M1	IV	Unknown	Insured	No	No	No	0	Dead	14	Breast	Dead (attributable to this cancer dx)	Alive or dead due to cancer
49	White	White	Female	8500	Moderately differentiated; Grade II	HR+/HER2- (Luminal A)	Positive	Positive	Negative	T2	N2NOS	M1	IV	Married (including common law)	Insured	No	No	No	0	Alive	25	Alive	Alive or dead of other cause	Alive or dead due to cancer
79	White	White	Female	8522	Moderately differentiated; Grade II	HR+/HER2- (Luminal A)	Positive	Negative	Negative	T2	N0	M1	IV	Married (including common law)	Insured	No	No	No	0	Dead	6	Breast	Dead (attributable to this cancer dx)	Alive or dead due to cancer
54	White	White	Female	8500	Poorly differentiated; Grade III	HR-/HER2- (Triple Negative)	Negative	Negative	Negative	T4b	N3a	M1	IV	Married (including common law)	Insured	No	Yes	No	0	Dead	11	Breast	Dead (attributable to this cancer dx)	Alive or dead due to cancer
77	Black	Black	Female	8500	Unknown	HR+/HER2- (Luminal A)	Positive	Positive	Negative	T4b	N1	M1	IV	Widowed	Insured	No	Yes	No	0	Dead	22	Breast	Dead (attributable to this cancer dx)	Alive or dead due to cancer
65	White	White	Female	8500	Moderately differentiated; Grade II	HR+/HER2- (Luminal A)	Positive	Positive	Negative	T3	N0	M1	IV	Unknown	Insured	No	No	Yes	0	Alive	33	Alive	Alive or dead of other cause	Alive or dead due to cancer
63	White	White	Female	8520	Moderately differentiated; Grade II	HR+/HER2- (Luminal A)	Positive	Positive	Negative	T3	N2a	M1	IV	Unknown	Insured/No specifics	No	No	No	0	Alive	29	Alive	Alive or dead of other cause	Alive or dead due to cancer
48	White	White	Female	8522	Moderately differentiated; Grade II	HR+/HER2- (Luminal A)	Positive	Positive	Negative	T1b	N0	M1	IV	Married (including common law)	Insured	No	Yes	No	0	Dead	29	Breast	Dead (attributable to this cancer dx)	Alive or dead due to cancer
48	White	White	Female	8500	Moderately differentiated; Grade II	HR+/HER2+ (Luminal B)	Positive	Positive	Positive	T1c	N0	M1	IV	Married (including common law)	Insured	Yes	No	No	0	Alive	22	Alive	Alive or dead of other cause	Alive or dead due to cancer
67	Unknown	Unknown	Female	8500	Moderately differentiated; Grade II	HR+/HER2- (Luminal A)	Positive	Positive	Negative	T3	N2a	M1	IV	Married (including common law)	Any Medicaid	Yes	No	Yes	0	Alive	29	Alive	Alive or dead of other cause	Alive or dead due to cancer
50	White	White	Female	8522	Moderately differentiated; Grade II	HR+/HER2- (Luminal A)	Positive	Negative	Negative	T2	N3c	M1	IV	Married (including common law)	Insured	No	No	No	0	Dead	29	Breast	Dead (attributable to this cancer dx)	Alive or dead due to cancer
61	White	White	Female	8522	Unknown	HR+/HER2- (Luminal A)	Positive	Positive	Negative	T1c	N1	M1	IV	Married (including common law)	Insured	No	No	No	22	Alive	24	Alive	Alive or dead of other cause	Alive or dead due to cancer
56	White	White	Female	8520	Moderately differentiated; Grade II	HR+/HER2- (Luminal A)	Positive	Negative	Negative	T2	N0	M1	IV	Widowed	Insured	No	No	No	0	Alive	35	Alive	Alive or dead of other cause	Alive or dead due to cancer
78	White	White	Female	8500	Unknown	HR+/HER2- (Luminal A)	Positive	Positive	Negative	T4b	N1	M1	IV	Widowed	Insured	No	No	No	0	Dead	5	Chronic Obstructive Pulmonary Disease and Allied Cond	Alive or dead of other cause	Dead (attributable to causes other than this cancer dx)
76	White	White	Female	8520	Well differentiated; Grade I	HR+/HER2- (Luminal A)	Positive	Positive	Negative	T2	N1	M1	IV	Married (including common law)	Insured	No	No	No	0	Dead	18	Diabetes Mellitus	Alive or dead of other cause	Dead (attributable to causes other than this cancer dx)
55	White	White	Female	8500	Moderately differentiated; Grade II	HR+/HER2- (Luminal A)	Positive	Positive	Negative	T2	N1	M1	IV	Married (including common law)	Insured/No specifics	No	No	No	41	Alive	24	Alive	Alive or dead of other cause	Alive or dead due to cancer
76	White	White	Male	8500	Poorly differentiated; Grade III	HR+/HER2- (Luminal A)	Positive	Positive	Negative	T3	N1	M1	IV	Widowed	Insured	No	No	Yes	0	Dead	29	Breast	Dead (attributable to this cancer dx)	Alive or dead due to cancer
83	White	White	Female	8520	Moderately differentiated; Grade II	HR+/HER2- (Luminal A)	Positive	Positive	Negative	T3	N3a	M1	IV	Widowed	Insured	No	No	No	51	Dead	14	Breast	Dead (attributable to this cancer dx)	Alive or dead due to cancer
54	White	White	Female	8500	Moderately differentiated; Grade II	HR+/HER2- (Luminal A)	Positive	Positive	Negative	T3	N1	M1	IV	Married (including common law)	Insurance status unknown	No	No	No	0	Dead	55	Breast	Dead (attributable to this cancer dx)	Alive or dead due to cancer
66	White	White	Female	8500	Poorly differentiated; Grade III	HR+/HER2- (Luminal A)	Positive	Positive	Negative	T3	N1	M1	IV	Married (including common law)	Insured	No	No	No	0	Alive	22	Alive	Alive or dead of other cause	Alive or dead due to cancer
38	Black	Black	Female	8500	Poorly differentiated; Grade III	HR-/HER2- (Triple Negative)	Negative	Negative	Negative	T3	N1	M1	IV	Single (never married)	Insured	No	No	No	0	Dead	1	Breast	Dead (attributable to this cancer dx)	Alive or dead due to cancer
80	White	White	Female	8500	Poorly differentiated; Grade III	HR+/HER2- (Luminal A)	Positive	Positive	Negative	T4b	N3b	M1	IV	Single (never married)	Insured/No specifics	No	No	No	0	Alive	13	Alive	Alive or dead of other cause	Alive or dead due to cancer
40	Black	Black	Female	8500	Poorly differentiated; Grade III	HR+/HER2+ (Luminal B)	Positive	Positive	Positive	T2	N2b	M1	IV	Single (never married)	Insured	No	Yes	No	0	Alive	15	Alive	Alive or dead of other cause	Alive or dead due to cancer
50	Black	Black	Female	8500	Poorly differentiated; Grade III	HR+/HER2- (Luminal A)	Positive	Negative	Negative	T1a	N3NOS	M1	IV	Married (including common law)	Insured	No	No	No	0	Dead	3	Breast	Dead (attributable to this cancer dx)	Alive or dead due to cancer
72	White	White	Female	8500	Moderately differentiated; Grade II	HR+/HER2+ (Luminal B)	Positive	Positive	Positive	T3	N1	M1	IV	Married (including common law)	Insured	No	No	Yes	0	Alive	17	Alive	Alive or dead of other cause	Alive or dead due to cancer
69	Black	Black	Female	8522	Moderately differentiated; Grade II	HR+/HER2- (Luminal A)	Positive	Positive	Negative	T4a	N1	M1	IV	Widowed	Insured	No	No	No	0	Alive	12	Alive	Alive or dead of other cause	Alive or dead due to cancer
33	Black	Black	Female	8522	Poorly differentiated; Grade III	HR+/HER2- (Luminal A)	Positive	Positive	Negative	T2	N1	M1	IV	Single (never married)	Insured	No	Yes	No	0	Dead	1	Other Cause of Death	Alive or dead of other cause	Dead (attributable to causes other than this cancer dx)
57	Other (American Indian/AK Native, Asian/Pacific Islander)	Asian or Pacific Islander	Female	8500	Moderately differentiated; Grade II	HR-/HER2- (Triple Negative)	Negative	Negative	Negative	T2	N3c	M1	IV	Single (never married)	Insured	Yes	No	Yes	0	Dead	14	Breast	Dead (attributable to this cancer dx)	Alive or dead due to cancer
65	White	White	Female	8520	Poorly differentiated; Grade III	HR-/HER2+ (HER2 enriched)	Negative	Negative	Positive	T2	N3b	M1	IV	Married (including common law)	Insured	No	No	No	0	Alive	15	Alive	Alive or dead of other cause	Alive or dead due to cancer
61	White	White	Female	8500	Poorly differentiated; Grade III	HR+/HER2- (Luminal A)	Positive	Negative	Negative	T3	N1	M1	IV	Single (never married)	Any Medicaid	No	No	Yes	0	Dead	13	Breast	Dead (attributable to this cancer dx)	Alive or dead due to cancer
77	White	White	Female	8500	Poorly differentiated; Grade III	HR+/HER2- (Luminal A)	Positive	Positive	Negative	T2	N1NOS	M1	IV	Married (including common law)	Any Medicaid	No	No	Yes	0	Alive	19	Alive	Alive or dead of other cause	Alive or dead due to cancer
73	White	White	Female	8520	Poorly differentiated; Grade III	HR+/HER2- (Luminal A)	Positive	Negative	Negative	T4d	N1	M1	IV	Single (never married)	Insured/No specifics	No	No	No	0	Dead	10	Breast	Dead (attributable to this cancer dx)	Alive or dead due to cancer
61	White	White	Female	8500	Moderately differentiated; Grade II	HR+/HER2- (Luminal A)	Positive	Positive	Negative	T3	N0	M1	IV	Married (including common law)	Insured/No specifics	No	No	No	0	Alive	15	Alive	Alive or dead of other cause	Alive or dead due to cancer
59	White	White	Female	8401	Poorly differentiated; Grade III	HR-/HER2+ (HER2 enriched)	Negative	Negative	Positive	T2	N0	M1	IV	Married (including common law)	Insured/No specifics	No	No	No	0	Alive	2	Alive	Alive or dead of other cause	Alive or dead due to cancer
51	White	White	Female	8523	Poorly differentiated; Grade III	HR+/HER2- (Luminal A)	Positive	Positive	Negative	T2	N2a	M1	IV	Married (including common law)	Insured	No	No	No	22	Alive	15	Alive	Alive or dead of other cause	Alive or dead due to cancer
63	White	White	Female	8500	Moderately differentiated; Grade II	HR+/HER2- (Luminal A)	Positive	Positive	Negative	T2	N1	M1	IV	Married (including common law)	Any Medicaid	No	No	Yes	0	Alive	4	Alive	Alive or dead of other cause	Alive or dead due to cancer
44	White	White	Female	8520	Moderately differentiated; Grade II	HR+/HER2- (Luminal A)	Positive	Positive	Negative	T4b	N1	M1	IV	Married (including common law)	Any Medicaid	No	No	No	0	Alive	16	Alive	Alive or dead of other cause	Alive or dead due to cancer
79	White	White	Female	8500	Well differentiated; Grade I	HR+/HER2- (Luminal A)	Positive	Positive	Negative	T2	N0	M1	IV	Married (including common law)	Insured/No specifics	No	No	No	0	Alive	17	Alive	Alive or dead of other cause	Alive or dead due to cancer
41	White	White	Female	8522	Poorly differentiated; Grade III	HR+/HER2+ (Luminal B)	Positive	Positive	Positive	T4a	N0	M1	IV	Divorced	Any Medicaid	No	No	No	0	Alive	17	Alive	Alive or dead of other cause	Alive or dead due to cancer
68	Black	Black	Female	8500	Moderately differentiated; Grade II	HR-/HER2+ (HER2 enriched)	Negative	Negative	Positive	T4b	N1	M1	IV	Married (including common law)	Insured	No	Yes	Yes	0	Alive	18	Alive	Alive or dead of other cause	Alive or dead due to cancer
80	White	White	Female	8500	Moderately differentiated; Grade II	HR+/HER2- (Luminal A)	Positive	Positive	Negative	T2	N1	M1	IV	Married (including common law)	Insured	No	No	No	0	Alive	15	Alive	Alive or dead of other cause	Alive or dead due to cancer
47	White	White	Female	8500	Poorly differentiated; Grade III	HR+/HER2- (Luminal A)	Positive	Positive	Negative	T3	N1	M1	IV	Married (including common law)	Insured	No	No	No	0	Alive	13	Alive	Alive or dead of other cause	Alive or dead due to cancer
77	White	White	Female	8522	Unknown	HR+/HER2+ (Luminal B)	Positive	Positive	Positive	T1c	N1	M1	IV	Married (including common law)	Insured	No	No	No	0	Alive	3	Alive	Alive or dead of other cause	Alive or dead due to cancer
85	White	White	Female	8050	Well differentiated; Grade I	HR+/HER2- (Luminal A)	Positive	Positive	Negative	T4b	N1	M1	IV	Widowed	Any Medicaid	No	No	No	0	Alive	17	Alive	Alive or dead of other cause	Alive or dead due to cancer
53	White	White	Female	8520	Moderately differentiated; Grade II	HR+/HER2- (Luminal A)	Positive	Positive	Negative	T4b	N3c	M1	IV	Married (including common law)	Insured	No	Yes	No	0	Alive	16	Alive	Alive or dead of other cause	Alive or dead due to cancer
64	White	White	Female	8520	Moderately differentiated; Grade II	HR+/HER2- (Luminal A)	Positive	Positive	Negative	T2	N0	M1	IV	Married (including common law)	Insured	No	No	No	0	Alive	16	Alive	Alive or dead of other cause	Alive or dead due to cancer
61	White	White	Female	8522	Moderately differentiated; Grade II	HR+/HER2- (Luminal A)	Positive	Positive	Negative	T4a	N0	M1	IV	Married (including common law)	Any Medicaid	No	No	Yes	90	Alive	23	Alive	Alive or dead of other cause	Alive or dead due to cancer
48	Unknown	Unknown	Female	8520	Moderately differentiated; Grade II	HR+/HER2- (Luminal A)	Positive	Positive	Negative	T4NOS	N0	M1	IV	Married (including common law)	Any Medicaid	No	Yes	Yes	0	Alive	2	Alive	Alive or dead of other cause	Alive or dead due to cancer
54	Other (American Indian/AK Native, Asian/Pacific Islander)	Asian or Pacific Islander	Female	8500	Poorly differentiated; Grade III	HR+/HER2- (Luminal A)	Positive	Negative	Negative	T2	N3a	M1	IV	Married (including common law)	Insured	No	No	No	20	Alive	20	Alive	Alive or dead of other cause	Alive or dead due to cancer
65	White	White	Female	8500	Poorly differentiated; Grade III	HR+/HER2- (Luminal A)	Positive	Negative	Negative	T2	N1	M1	IV	Married (including common law)	Insured	No	No	Yes	0	Alive	17	Alive	Alive or dead of other cause	Alive or dead due to cancer
79	White	White	Female	8500	Poorly differentiated; Grade III	HR+/HER2- (Luminal A)	Positive	Positive	Negative	T4b	N1	M1	IV	Married (including common law)	Insured	No	Yes	Yes	0	Alive	22	Alive	Alive or dead of other cause	Alive or dead due to cancer
45	White	White	Male	8500	Unknown	HR+/HER2+ (Luminal B)	Positive	Positive	Positive	T2	N0	M1	IV	Married (including common law)	Insured	No	Yes	No	0	Alive	19	Alive	Alive or dead of other cause	Alive or dead due to cancer
52	White	White	Female	8500	Poorly differentiated; Grade III	HR+/HER2- (Luminal A)	Positive	Negative	Negative	T2	N1	M1	IV	Single (never married)	Any Medicaid	No	No	No	0	Dead	9	Breast	Dead (attributable to this cancer dx)	Alive or dead due to cancer
47	White	White	Female	8500	Poorly differentiated; Grade III	HR+/HER2- (Luminal A)	Positive	Positive	Negative	T3	N1	M1	IV	Married (including common law)	Insured	No	No	No	0	Alive	16	Alive	Alive or dead of other cause	Alive or dead due to cancer
51	White	White	Female	8520	Moderately differentiated; Grade II	HR+/HER2+ (Luminal B)	Positive	Positive	Positive	T3	N1	M1	IV	Single (never married)	Insured	No	No	No	0	Alive	14	Alive	Alive or dead of other cause	Alive or dead due to cancer
31	White	White	Female	8500	Moderately differentiated; Grade II	HR-/HER2- (Triple Negative)	Negative	Negative	Negative	T4d	N3b	M1	IV	Single (never married)	Any Medicaid	No	Yes	No	0	Dead	5	Breast	Dead (attributable to this cancer dx)	Alive or dead due to cancer
56	Black	Black	Female	8520	Poorly differentiated; Grade III	HR+/HER2- (Luminal A)	Positive	Positive	Negative	T3	N1	M1	IV	Single (never married)	Insured	No	No	No	0	Alive	19	Alive	Alive or dead of other cause	Alive or dead due to cancer
78	White	White	Female	8500	Moderately differentiated; Grade II	HR-/HER2+ (HER2 enriched)	Negative	Negative	Positive	T4b	N1	M1	IV	Single (never married)	Insured/No specifics	No	No	No	0	Alive	9	Alive	Alive or dead of other cause	Alive or dead due to cancer
85	White	White	Female	8500	Poorly differentiated; Grade III	HR+/HER2- (Luminal A)	Positive	Negative	Negative	T4b	N1	M1	IV	Single (never married)	Insured	No	No	No	0	Alive	23	Alive	Alive or dead of other cause	Alive or dead due to cancer
65	White	White	Female	8500	Poorly differentiated; Grade III	HR+/HER2- (Luminal A)	Positive	Positive	Negative	T3	N1a	M1	IV	Married (including common law)	Insured/No specifics	Yes	Yes	Yes	0	Dead	1	Breast	Dead (attributable to this cancer dx)	Alive or dead due to cancer
57	White	White	Female	8140	Unknown	HR+/HER2- (Luminal A)	Positive	Positive	Negative	T4a	N1	M1	IV	Married (including common law)	Insured	No	No	Yes	0	Alive	16	Alive	Alive or dead of other cause	Alive or dead due to cancer
43	White	White	Female	8500	Poorly differentiated; Grade III	HR+/HER2- (Luminal A)	Positive	Positive	Negative	T2	N1	M1	IV	Single (never married)	Any Medicaid	No	No	No	0	Dead	17	Breast	Dead (attributable to this cancer dx)	Alive or dead due to cancer
58	White	White	Male	8500	Moderately differentiated; Grade II	HR+/HER2- (Luminal A)	Positive	Positive	Negative	T3	N1	M1	IV	Single (never married)	Any Medicaid	No	Yes	Yes	0	Dead	11	Breast	Dead (attributable to this cancer dx)	Alive or dead due to cancer
36	Black	Black	Female	8500	Moderately differentiated; Grade II	HR+/HER2+ (Luminal B)	Positive	Positive	Positive	T2	N1NOS	M1	IV	Single (never married)	Any Medicaid	No	No	No	0	Alive	12	Alive	Alive or dead of other cause	Alive or dead due to cancer
48	White	White	Female	8500	Moderately differentiated; Grade II	HR+/HER2+ (Luminal B)	Positive	Negative	Positive	T2	N2a	M1	IV	Married (including common law)	Insured/No specifics	No	No	Yes	0	Alive	13	Alive	Alive or dead of other cause	Alive or dead due to cancer
39	Unknown	Unknown	Female	8500	Moderately differentiated; Grade II	HR+/HER2- (Luminal A)	Positive	Positive	Negative	T2	N1	M1	IV	Married (including common law)	Insured	No	Yes	No	0	Alive	13	Alive	Alive or dead of other cause	Alive or dead due to cancer
50	White	White	Female	8500	Moderately differentiated; Grade II	HR+/HER2- (Luminal A)	Positive	Positive	Negative	T3	N1	M1	IV	Unknown	Any Medicaid	No	No	Yes	0	Alive	13	Alive	Alive or dead of other cause	Alive or dead due to cancer
55	Other (American Indian/AK Native, Asian/Pacific Islander)	Asian or Pacific Islander	Female	8500	Poorly differentiated; Grade III	HR-/HER2+ (HER2 enriched)	Negative	Negative	Positive	T2	N1NOS	M1	IV	Married (including common law)	Insured	No	Yes	No	0	Alive	20	Alive	Alive or dead of other cause	Alive or dead due to cancer
67	White	White	Female	8520	Moderately differentiated; Grade II	HR+/HER2- (Luminal A)	Positive	Positive	Negative	T1c	N0	M1	IV	Married (including common law)	Insured	No	No	No	0	Alive	17	Alive	Alive or dead of other cause	Alive or dead due to cancer
59	Other (American Indian/AK Native, Asian/Pacific Islander)	Asian or Pacific Islander	Female	8520	Poorly differentiated; Grade III	HR+/HER2- (Luminal A)	Positive	Positive	Negative	T4b	N0	M1	IV	Widowed	Any Medicaid	No	No	No	0	Dead	12	Breast	Dead (attributable to this cancer dx)	Alive or dead due to cancer
61	White	White	Female	8520	Moderately differentiated; Grade II	HR+/HER2- (Luminal A)	Positive	Positive	Negative	T3	N1	M1	IV	Married (including common law)	Insured/No specifics	No	No	No	0	Alive	14	Alive	Alive or dead of other cause	Alive or dead due to cancer
52	Black	Black	Female	8530	Poorly differentiated; Grade III	HR-/HER2- (Triple Negative)	Negative	Negative	Negative	T4d	N3c	M1	IV	Single (never married)	Any Medicaid	No	No	Yes	0	Dead	6	Breast	Dead (attributable to this cancer dx)	Alive or dead due to cancer
73	White	White	Female	8522	Moderately differentiated; Grade II	HR+/HER2- (Luminal A)	Positive	Positive	Negative	T1c	N1	M1	IV	Widowed	Insured	No	Yes	No	0	Alive	16	Alive	Alive or dead of other cause	Alive or dead due to cancer
28	White	White	Female	8500	Moderately differentiated; Grade II	HR+/HER2+ (Luminal B)	Positive	Negative	Positive	T3	N1	M1	IV	Single (never married)	Insured	No	Yes	No	0	Alive	16	Alive	Alive or dead of other cause	Alive or dead due to cancer
63	White	White	Female	8500	Poorly differentiated; Grade III	HR+/HER2- (Luminal A)	Positive	Positive	Negative	T3	N2a	M1	IV	Married (including common law)	Insured	No	No	No	0	Alive	18	Alive	Alive or dead of other cause	Alive or dead due to cancer
94	White	White	Female	8500	Unknown	HR+/HER2- (Luminal A)	Positive	Positive	Negative	T4c	N1	M1	IV	Unknown	Insurance status unknown	No	No	Yes	0	Alive	22	Alive	Alive or dead of other cause	Alive or dead due to cancer
75	White	White	Female	8500	Moderately differentiated; Grade II	HR+/HER2- (Luminal A)	Positive	Positive	Negative	T2	N0	M1	IV	Widowed	Uninsured	No	No	No	0	Alive	7	Alive	Alive or dead of other cause	Alive or dead due to cancer
82	White	White	Female	8530	Poorly differentiated; Grade III	HR-/HER2- (Triple Negative)	Negative	Negative	Negative	T4d	N2NOS	M1	IV	Divorced	Insured	No	No	No	0	Dead	5	Breast	Dead (attributable to this cancer dx)	Alive or dead due to cancer
71	White	White	Female	8500	Poorly differentiated; Grade III	HR-/HER2- (Triple Negative)	Negative	Negative	Negative	T4d	N3c	M1	IV	Widowed	Insured	No	No	No	0	Alive	16	Alive	Alive or dead of other cause	Alive or dead due to cancer
69	White	White	Female	8500	Poorly differentiated; Grade III	HR-/HER2+ (HER2 enriched)	Negative	Negative	Positive	T4b	N1	M1	IV	Married (including common law)	Insured/No specifics	No	Yes	Yes	0	Alive	16	Alive	Alive or dead of other cause	Alive or dead due to cancer
36	White	White	Female	8500	Poorly differentiated; Grade III	HR+/HER2+ (Luminal B)	Positive	Positive	Positive	T2	N1	M1	IV	Single (never married)	Insured	No	No	No	52	Dead	43	Breast	Dead (attributable to this cancer dx)	Alive or dead due to cancer
51	White	White	Female	8500	Poorly differentiated; Grade III	HR+/HER2- (Luminal A)	Negative	Positive	Negative	T2	N1	M1	IV	Single (never married)	Any Medicaid	No	Yes	Yes	0	Dead	6	Breast	Dead (attributable to this cancer dx)	Alive or dead due to cancer
54	White	White	Female	8500	Poorly differentiated; Grade III	HR+/HER2+ (Luminal B)	Positive	Positive	Positive	T2	N0	M1	IV	Divorced	Insured	No	Yes	No	22	Dead	24	Breast	Dead (attributable to this cancer dx)	Alive or dead due to cancer
52	Black	Black	Female	8500	Moderately differentiated; Grade II	HR+/HER2- (Luminal A)	Positive	Positive	Negative	T2	N1a	M1	IV	Single (never married)	Insured	No	No	No	22	Alive	82	Alive	Alive or dead of other cause	Alive or dead due to cancer
82	White	White	Female	8500	Moderately differentiated; Grade II	HR+/HER2- (Luminal A)	Positive	Positive	Negative	T2	N0	M1	IV	Widowed	Insured/No specifics	No	No	No	41	Alive	80	Alive	Alive or dead of other cause	Alive or dead due to cancer
68	White	White	Female	8500	Moderately differentiated; Grade II	HR+/HER2+ (Luminal B)	Positive	Positive	Positive	T4b	N0	M1	IV	Widowed	Insured/No specifics	No	Yes	Yes	22	Alive	80	Alive	Alive or dead of other cause	Alive or dead due to cancer
75	Black	Black	Female	8500	Unknown	HR+/HER2+ (Luminal B)	Positive	Negative	Positive	T2	N0	M1	IV	Widowed	Insured/No specifics	Yes	No	No	0	Dead	19	Breast	Dead (attributable to this cancer dx)	Alive or dead due to cancer
61	White	White	Female	8500	Moderately differentiated; Grade II	HR+/HER2- (Luminal A)	Positive	Positive	Negative	T2	N1a	M1	IV	Divorced	Insured/No specifics	No	No	No	51	Alive	78	Alive	Alive or dead of other cause	Alive or dead due to cancer
81	White	White	Female	8520	Moderately differentiated; Grade II	HR+/HER2- (Luminal A)	Positive	Positive	Negative	T4b	N1	M1	IV	Single (never married)	Insured/No specifics	No	No	No	0	Dead	1	Breast	Dead (attributable to this cancer dx)	Alive or dead due to cancer
50	Black	Black	Female	8140	Unknown	HR+/HER2- (Luminal A)	Positive	Positive	Negative	T2	N1	M1	IV	Single (never married)	Insured	No	Yes	Yes	0	Dead	31	Breast	Dead (attributable to this cancer dx)	Alive or dead due to cancer
60	White	White	Female	8500	Poorly differentiated; Grade III	HR-/HER2- (Triple Negative)	Negative	Negative	Negative	T4a	N1	M1	IV	Married (including common law)	Insured	No	Yes	Yes	22	Dead	7	Breast	Dead (attributable to this cancer dx)	Alive or dead due to cancer
38	White	White	Female	8500	Moderately differentiated; Grade II	HR+/HER2+ (Luminal B)	Positive	Positive	Positive	T4d	N1	M1	IV	Single (never married)	Insured/No specifics	No	No	No	0	Dead	69	Breast	Dead (attributable to this cancer dx)	Alive or dead due to cancer
58	Black	Black	Female	8500	Poorly differentiated; Grade III	HR+/HER2- (Luminal A)	Positive	Positive	Negative	T4b	N1	M1	IV	Single (never married)	Insured	Yes	No	No	0	Dead	21	Diseases of Heart	Alive or dead of other cause	Dead (attributable to causes other than this cancer dx)
47	White	White	Female	8500	Moderately differentiated; Grade II	HR+/HER2- (Luminal A)	Positive	Positive	Negative	T4b	N1a	M1	IV	Married (including common law)	Insured	No	Yes	No	51	Dead	44	Breast	Dead (attributable to this cancer dx)	Alive or dead due to cancer
44	Black	Black	Female	8500	Poorly differentiated; Grade III	HR-/HER2- (Triple Negative)	Negative	Negative	Negative	T3	N2a	M1	IV	Married (including common law)	Insured	No	No	Yes	41	Dead	10	Breast	Dead (attributable to this cancer dx)	Alive or dead due to cancer
76	Black	Black	Female	8010	Unknown	HR+/HER2- (Luminal A)	Positive	Negative	Negative	T4d	N1	M1	IV	Married (including common law)	Insured	No	No	No	0	Dead	5	Breast	Dead (attributable to this cancer dx)	Alive or dead due to cancer
63	White	White	Female	8500	Moderately differentiated; Grade II	HR+/HER2- (Luminal A)	Positive	Negative	Negative	T2	N1a	M1	IV	Married (including common law)	Insured	No	No	No	22	Alive	80	Alive	Alive or dead of other cause	Alive or dead due to cancer
52	White	White	Female	8520	Poorly differentiated; Grade III	HR+/HER2+ (Luminal B)	Positive	Positive	Positive	T2	N0	M1	IV	Married (including common law)	Insured	No	No	No	22	Dead	24	Breast	Dead (attributable to this cancer dx)	Alive or dead due to cancer
65	Black	Black	Female	8500	Poorly differentiated; Grade III	HR+/HER2- (Luminal A)	Positive	Positive	Negative	T3	N0	M1	IV	Divorced	Insured	No	No	No	22	Dead	33	Breast	Dead (attributable to this cancer dx)	Alive or dead due to cancer
81	White	White	Female	8500	Moderately differentiated; Grade II	HR+/HER2- (Luminal A)	Positive	Positive	Negative	T3	N1	M1	IV	Widowed	Insured/No specifics	No	No	Yes	0	Dead	74	Breast	Dead (attributable to this cancer dx)	Alive or dead due to cancer
52	White	White	Female	8520	Unknown	HR+/HER2- (Luminal A)	Positive	Positive	Negative	T1c	N0	M1	IV	Divorced	Any Medicaid	No	No	No	0	Dead	5	Breast	Dead (attributable to this cancer dx)	Alive or dead due to cancer
63	White	White	Female	8500	Poorly differentiated; Grade III	HR-/HER2+ (HER2 enriched)	Negative	Negative	Positive	T1c	N3a	M1	IV	Married (including common law)	Insured/No specifics	No	No	Yes	41	Dead	21	Breast	Dead (attributable to this cancer dx)	Alive or dead due to cancer
71	White	White	Female	8500	Poorly differentiated; Grade III	HR+/HER2- (Luminal A)	Positive	Negative	Negative	T4d	N3a	M1	IV	Divorced	Insured	No	Yes	No	51	Dead	24	Breast	Dead (attributable to this cancer dx)	Alive or dead due to cancer
64	Other (American Indian/AK Native, Asian/Pacific Islander)	Asian or Pacific Islander	Female	8522	Poorly differentiated; Grade III	HR+/HER2- (Luminal A)	Positive	Positive	Negative	T2	N1a	M1	IV	Married (including common law)	Insured	No	No	No	51	Alive	76	Alive	Alive or dead of other cause	Alive or dead due to cancer
88	White	White	Female	8523	Poorly differentiated; Grade III	HR-/HER2+ (HER2 enriched)	Negative	Negative	Positive	T4b	N0	M1	IV	Widowed	Any Medicaid	No	No	No	0	Dead	4	Breast	Dead (attributable to this cancer dx)	Alive or dead due to cancer
46	White	White	Female	8500	Moderately differentiated; Grade II	HR+/HER2- (Luminal A)	Positive	Positive	Negative	T2	N1	M1	IV	Married (including common law)	Insured	No	No	No	0	Dead	18	Other Cause of Death	Alive or dead of other cause	Dead (attributable to causes other than this cancer dx)
83	White	White	Female	8500	Moderately differentiated; Grade II	HR+/HER2- (Luminal A)	Positive	Positive	Negative	T3	N1	M1	IV	Widowed	Insured	No	No	Yes	0	Dead	17	Breast	Dead (attributable to this cancer dx)	Alive or dead due to cancer
55	White	White	Female	8140	Unknown	HR+/HER2- (Luminal A)	Positive	Positive	Negative	T3	N2NOS	M1	IV	Married (including common law)	Insured	No	No	Yes	0	Alive	81	Alive	Alive or dead of other cause	Alive or dead due to cancer
48	Black	Black	Female	8500	Moderately differentiated; Grade II	HR+/HER2- (Luminal A)	Positive	Positive	Negative	T2	N1	M1	IV	Single (never married)	Uninsured	Yes	No	Yes	0	Dead	7	Breast	Dead (attributable to this cancer dx)	Alive or dead due to cancer
48	White	White	Female	8500	Poorly differentiated; Grade III	HR+/HER2- (Luminal A)	Positive	Positive	Negative	T2	N1	M1	IV	Single (never married)	Any Medicaid	No	No	No	0	Dead	18	Breast	Dead (attributable to this cancer dx)	Alive or dead due to cancer
54	White	White	Female	8500	Moderately differentiated; Grade II	HR-/HER2- (Triple Negative)	Negative	Negative	Negative	T2	N0	M1	IV	Divorced	Insured/No specifics	No	Yes	No	0	Dead	10	Breast	Dead (attributable to this cancer dx)	Alive or dead due to cancer
35	Black	Black	Female	8500	Moderately differentiated; Grade II	HR+/HER2- (Luminal A)	Positive	Positive	Negative	T2	N1	M1	IV	Single (never married)	Any Medicaid	No	No	Yes	50	Dead	48	Breast	Dead (attributable to this cancer dx)	Alive or dead due to cancer
34	Black	Black	Female	8500	Moderately differentiated; Grade II	HR+/HER2- (Luminal A)	Positive	Positive	Negative	T2	N1	M1	IV	Single (never married)	Any Medicaid	No	No	No	0	Dead	38	Breast	Dead (attributable to this cancer dx)	Alive or dead due to cancer
60	White	White	Female	8500	Moderately differentiated; Grade II	HR+/HER2- (Luminal A)	Positive	Positive	Negative	T4b	N1	M1	IV	Single (never married)	Any Medicaid	No	No	No	0	Alive	39	Alive	Alive or dead of other cause	Alive or dead due to cancer
37	White	White	Female	8500	Unknown	HR-/HER2+ (HER2 enriched)	Negative	Negative	Positive	T4a	N1	M1	IV	Divorced	Any Medicaid	Yes	Yes	Yes	0	Dead	11	Breast	Dead (attributable to this cancer dx)	Alive or dead due to cancer
43	Black	Black	Female	8500	Poorly differentiated; Grade III	HR-/HER2- (Triple Negative)	Negative	Negative	Negative	T2	N2a	M1	IV	Divorced	Insured	No	No	No	51	Dead	5	Breast	Dead (attributable to this cancer dx)	Alive or dead due to cancer
70	Black	Black	Female	8500	Moderately differentiated; Grade II	HR+/HER2- (Luminal A)	Positive	Positive	Negative	T2	N0	M1	IV	Single (never married)	Insured/No specifics	No	No	No	22	Dead	2	Breast	Dead (attributable to this cancer dx)	Alive or dead due to cancer
67	White	White	Female	8500	Poorly differentiated; Grade III	HR-/HER2+ (HER2 enriched)	Negative	Negative	Positive	T3	N0	M1	IV	Divorced	Insured/No specifics	No	No	No	22	Alive	75	Alive	Alive or dead of other cause	Alive or dead due to cancer
43	Black	Black	Female	8530	Poorly differentiated; Grade III	HR-/HER2+ (HER2 enriched)	Negative	Negative	Positive	T4d	N3b	M1	IV	Separated	Insured	No	No	No	0	Dead	20	Breast	Dead (attributable to this cancer dx)	Alive or dead due to cancer
83	Black	Black	Female	8520	Unknown	HR+/HER2- (Luminal A)	Positive	Positive	Negative	T3	N0	M1	IV	Unknown	Insured	No	No	No	0	Dead	32	Diseases of Heart	Alive or dead of other cause	Dead (attributable to causes other than this cancer dx)
71	White	White	Female	8500	Poorly differentiated; Grade III	HR+/HER2+ (Luminal B)	Positive	Positive	Positive	T4b	N2NOS	M1	IV	Single (never married)	Insured	No	No	Yes	0	Dead	44	Breast	Dead (attributable to this cancer dx)	Alive or dead due to cancer
84	White	White	Female	8500	Moderately differentiated; Grade II	HR+/HER2- (Luminal A)	Positive	Positive	Negative	T2	N0	M1	IV	Widowed	Insured/No specifics	No	No	Yes	0	Alive	71	Alive	Alive or dead of other cause	Alive or dead due to cancer
50	White	White	Female	8500	Well differentiated; Grade I	HR+/HER2- (Luminal A)	Positive	Positive	Negative	T1c	N0	M1	IV	Widowed	Insured	No	No	Yes	22	Alive	74	Alive	Alive or dead of other cause	Alive or dead due to cancer
51	Black	Black	Female	8500	Poorly differentiated; Grade III	HR+/HER2- (Luminal A)	Positive	Negative	Negative	T4d	N2a	M1	IV	Single (never married)	Any Medicaid	No	Yes	No	0	Dead	2	Breast	Dead (attributable to this cancer dx)	Alive or dead due to cancer
56	White	White	Female	8500	Moderately differentiated; Grade II	HR+/HER2- (Luminal A)	Positive	Positive	Negative	T2	N0	M1	IV	Single (never married)	Any Medicaid	No	No	No	0	Dead	8	Breast	Dead (attributable to this cancer dx)	Alive or dead due to cancer
57	White	White	Female	8500	Moderately differentiated; Grade II	HR+/HER2- (Luminal A)	Positive	Positive	Negative	T2	N1	M1	IV	Divorced	Insured	No	No	No	0	Dead	45	Breast	Dead (attributable to this cancer dx)	Alive or dead due to cancer
49	White	White	Female	8500	Unknown	HR+/HER2- (Luminal A)	Positive	Positive	Negative	T4b	N1	M1	IV	Married (including common law)	Insured	No	No	No	0	Dead	34	Breast	Dead (attributable to this cancer dx)	Alive or dead due to cancer
58	Black	Black	Female	8010	Unknown	HR-/HER2- (Triple Negative)	Negative	Negative	Negative	T3	N1	M1	IV	Single (never married)	Insured	Yes	No	Yes	0	Dead	2	Breast	Dead (attributable to this cancer dx)	Alive or dead due to cancer
49	Other (American Indian/AK Native, Asian/Pacific Islander)	Asian or Pacific Islander	Female	8500	Moderately differentiated; Grade II	HR+/HER2- (Luminal A)	Positive	Positive	Negative	T2	N0	M1	IV	Married (including common law)	Insured	No	No	No	0	Dead	20	Breast	Dead (attributable to this cancer dx)	Alive or dead due to cancer
39	White	White	Female	8500	Poorly differentiated; Grade III	HR+/HER2+ (Luminal B)	Positive	Positive	Positive	T3	N1a	M1	IV	Married (including common law)	Insured	No	No	No	51	Dead	46	Breast	Dead (attributable to this cancer dx)	Alive or dead due to cancer
74	White	White	Female	8500	Well differentiated; Grade I	HR+/HER2- (Luminal A)	Positive	Positive	Negative	T4b	N2a	M1	IV	Single (never married)	Insured	No	No	No	0	Dead	34	Breast	Dead (attributable to this cancer dx)	Alive or dead due to cancer
81	White	White	Female	8500	Poorly differentiated; Grade III	HR+/HER2- (Luminal A)	Positive	Positive	Negative	T2	N3a	M1	IV	Widowed	Insured	No	Yes	Yes	51	Dead	12	Breast	Dead (attributable to this cancer dx)	Alive or dead due to cancer
67	White	White	Female	8500	Unknown	HR+/HER2- (Luminal A)	Positive	Positive	Negative	T4a	N1	M1	IV	Unknown	Insured	No	No	Yes	0	Dead	17	Breast	Dead (attributable to this cancer dx)	Alive or dead due to cancer
55	White	White	Female	8500	Moderately differentiated; Grade II	HR+/HER2- (Luminal A)	Positive	Positive	Negative	T2	N2a	M1	IV	Married (including common law)	Insured	No	No	No	54	Dead	23	Breast	Dead (attributable to this cancer dx)	Alive or dead due to cancer
44	Black	Black	Female	8500	Moderately differentiated; Grade II	HR+/HER2- (Luminal A)	Positive	Positive	Negative	T2	N1	M1	IV	Single (never married)	Insured	No	No	No	22	Alive	74	Alive	Alive or dead of other cause	Alive or dead due to cancer
49	White	White	Female	8520	Poorly differentiated; Grade III	HR+/HER2- (Luminal A)	Positive	Positive	Negative	T3	N2a	M1	IV	Married (including common law)	Insured	No	No	No	51	Alive	74	Alive	Alive or dead of other cause	Alive or dead due to cancer
60	White	White	Male	8500	Moderately differentiated; Grade II	HR+/HER2- (Luminal A)	Positive	Positive	Negative	T3	N2a	M1	IV	Divorced	Insured	No	No	Yes	51	Dead	19	Other Cause of Death	Alive or dead of other cause	Dead (attributable to causes other than this cancer dx)
61	Black	Black	Female	8500	Poorly differentiated; Grade III	HR+/HER2+ (Luminal B)	Positive	Positive	Positive	T2	N1NOS	M1	IV	Single (never married)	Insured	No	No	No	22	Alive	71	Alive	Alive or dead of other cause	Alive or dead due to cancer
62	Black	Black	Female	8507	Poorly differentiated; Grade III	HR+/HER2+ (Luminal B)	Positive	Negative	Positive	T3	N3a	M1	IV	Divorced	Insured	No	No	No	51	Dead	10	Breast	Dead (attributable to this cancer dx)	Alive or dead due to cancer
60	White	White	Female	8500	Moderately differentiated; Grade II	HR+/HER2- (Luminal A)	Positive	Positive	Negative	T3	N2a	M1	IV	Married (including common law)	Insured	No	No	No	51	Dead	50	Breast	Dead (attributable to this cancer dx)	Alive or dead due to cancer
29	White	White	Female	8520	Poorly differentiated; Grade III	HR+/HER2- (Luminal A)	Positive	Positive	Negative	T3	N1NOS	M1	IV	Married (including common law)	Insured	No	No	No	63	Alive	69	Alive	Alive or dead of other cause	Alive or dead due to cancer
61	Black	Black	Female	8500	Poorly differentiated; Grade III	HR+/HER2- (Luminal A)	Negative	Positive	Negative	T2	N0	M1	IV	Unknown	Insured/No specifics	No	Yes	No	0	Dead	3	Breast	Dead (attributable to this cancer dx)	Alive or dead due to cancer
40	Black	Black	Female	8500	Poorly differentiated; Grade III	HR+/HER2- (Luminal A)	Positive	Positive	Negative	T4b	N3b	M1	IV	Single (never married)	Insured	No	Yes	No	0	Dead	14	Breast	Dead (attributable to this cancer dx)	Alive or dead due to cancer
35	White	White	Female	8500	Poorly differentiated; Grade III	HR+/HER2+ (Luminal B)	Positive	Positive	Positive	T4d	N1	M1	IV	Divorced	Insured/No specifics	No	No	No	51	Alive	69	Alive	Alive or dead of other cause	Alive or dead due to cancer
67	Black	Black	Female	8500	Poorly differentiated; Grade III	HR-/HER2- (Triple Negative)	Negative	Negative	Negative	T4a	N1	M1	IV	Married (including common law)	Insured/No specifics	No	No	Yes	0	Dead	4	Breast	Dead (attributable to this cancer dx)	Alive or dead due to cancer
61	White	White	Female	8500	Unknown	HR+/HER2+ (Luminal B)	Positive	Positive	Positive	T2	N1	M1	IV	Married (including common law)	Insured	No	No	No	0	Alive	75	Alive	Alive or dead of other cause	Alive or dead due to cancer
40	White	White	Female	8500	Well differentiated; Grade I	HR+/HER2- (Luminal A)	Positive	Negative	Negative	T4a	N2a	M1	IV	Single (never married)	Any Medicaid	No	Yes	No	0	Dead	1	Breast	Dead (attributable to this cancer dx)	Alive or dead due to cancer
40	Black	Black	Female	8500	Poorly differentiated; Grade III	HR-/HER2- (Triple Negative)	Negative	Negative	Negative	T4a	N0	M1	IV	Single (never married)	Insured/No specifics	No	No	No	20	Alive	67	Alive	Alive or dead of other cause	Alive or dead due to cancer
47	Black	Black	Female	8500	Poorly differentiated; Grade III	HR+/HER2- (Luminal A)	Positive	Positive	Negative	T4b	N1	M1	IV	Single (never married)	Uninsured	No	No	No	0	Dead	7	Breast	Dead (attributable to this cancer dx)	Alive or dead due to cancer
78	White	White	Female	8500	Moderately differentiated; Grade II	HR+/HER2- (Luminal A)	Positive	Positive	Negative	T3	N0	M1	IV	Widowed	Insured	No	No	No	0	Dead	28	Diseases of Heart	Alive or dead of other cause	Dead (attributable to causes other than this cancer dx)
82	White	White	Male	8500	Moderately differentiated; Grade II	HR+/HER2- (Luminal A)	Positive	Positive	Negative	T1b	N1mi	M1	IV	Married (including common law)	Insured	No	No	No	41	Dead	47	Breast	Dead (attributable to this cancer dx)	Alive or dead due to cancer
51	Black	Black	Female	8500	Poorly differentiated; Grade III	HR-/HER2- (Triple Negative)	Negative	Negative	Negative	T1c	N0	M1	IV	Married (including common law)	Insured	No	No	No	0	Dead	2	Septicemia	Alive or dead of other cause	Dead (attributable to causes other than this cancer dx)
51	White	White	Female	8500	Moderately differentiated; Grade II	HR+/HER2- (Luminal A)	Positive	Positive	Negative	T3	N1	M1	IV	Single (never married)	Uninsured	No	No	No	0	Alive	72	Alive	Alive or dead of other cause	Alive or dead due to cancer
54	Black	Black	Female	8500	Poorly differentiated; Grade III	HR-/HER2- (Triple Negative)	Negative	Negative	Negative	T2	N0	M1	IV	Single (never married)	Insured	No	No	No	50	Dead	4	Diseases of Heart	Alive or dead of other cause	Dead (attributable to causes other than this cancer dx)
80	Black	Black	Female	8500	Poorly differentiated; Grade III	HR-/HER2- (Triple Negative)	Negative	Negative	Negative	T4b	N1	M1	IV	Married (including common law)	Insured/No specifics	No	Yes	Yes	0	Dead	13	Breast	Dead (attributable to this cancer dx)	Alive or dead due to cancer
86	White	White	Female	8500	Moderately differentiated; Grade II	HR+/HER2- (Luminal A)	Positive	Positive	Negative	T3	N1	M1	IV	Widowed	Insured	No	No	Yes	0	Alive	68	Alive	Alive or dead of other cause	Alive or dead due to cancer
58	White	White	Female	8520	Moderately differentiated; Grade II	HR+/HER2- (Luminal A)	Positive	Positive	Negative	T2	N3a	M1	IV	Single (never married)	Any Medicaid	No	No	No	51	Alive	73	Alive	Alive or dead of other cause	Alive or dead due to cancer
47	Black	Black	Female	8500	Poorly differentiated; Grade III	HR-/HER2+ (HER2 enriched)	Negative	Negative	Positive	T1c	N1	M1	IV	Married (including common law)	Insured/No specifics	No	No	No	0	Dead	8	Breast	Dead (attributable to this cancer dx)	Alive or dead due to cancer
41	White	White	Female	8500	Poorly differentiated; Grade III	HR-/HER2- (Triple Negative)	Negative	Negative	Negative	T2	N1	M1	IV	Married (including common law)	Insured	No	Yes	Yes	0	Dead	27	Breast	Dead (attributable to this cancer dx)	Alive or dead due to cancer
59	White	White	Female	8500	Unknown	HR+/HER2- (Luminal A)	Positive	Negative	Negative	T2	N0	M1	IV	Married (including common law)	Insured	No	No	No	0	Alive	70	Alive	Alive or dead of other cause	Alive or dead due to cancer
64	White	White	Female	8500	Moderately differentiated; Grade II	HR+/HER2- (Luminal A)	Positive	Positive	Negative	T4b	N2a	M1	IV	Widowed	Insured	No	No	Yes	0	Dead	15	Breast	Dead (attributable to this cancer dx)	Alive or dead due to cancer
68	White	White	Female	8500	Moderately differentiated; Grade II	HR+/HER2- (Luminal A)	Positive	Positive	Negative	T1a	N0	M1	IV	Divorced	Insured/No specifics	No	No	No	0	Dead	4	Breast	Dead (attributable to this cancer dx)	Alive or dead due to cancer
63	White	White	Female	8500	Poorly differentiated; Grade III	HR+/HER2- (Luminal A)	Positive	Positive	Negative	T2	N1	M1	IV	Single (never married)	Any Medicaid	No	No	No	0	Dead	16	Breast	Dead (attributable to this cancer dx)	Alive or dead due to cancer
43	White	White	Female	8500	Well differentiated; Grade I	HR+/HER2- (Luminal A)	Positive	Positive	Negative	T1c	N0	M1	IV	Married (including common law)	Insured	No	No	No	0	Alive	68	Alive	Alive or dead of other cause	Alive or dead due to cancer
93	Black	Black	Female	8523	Moderately differentiated; Grade II	HR+/HER2- (Luminal A)	Positive	Negative	Negative	T4b	N1NOS	M1	IV	Widowed	Insured	Yes	Yes	Yes	51	Dead	4	Breast	Dead (attributable to this cancer dx)	Alive or dead due to cancer
39	White	White	Female	8500	Moderately differentiated; Grade II	HR+/HER2- (Luminal A)	Positive	Negative	Negative	T4d	N1	M1	IV	Married (including common law)	Any Medicaid	No	Yes	No	0	Dead	23	Breast	Dead (attributable to this cancer dx)	Alive or dead due to cancer
29	White	White	Female	8500	Moderately differentiated; Grade II	HR+/HER2- (Luminal A)	Positive	Positive	Negative	T4b	N1	M1	IV	Married (including common law)	Any Medicaid	No	No	No	0	Dead	41	Breast	Dead (attributable to this cancer dx)	Alive or dead due to cancer
59	Black	Black	Female	8520	Moderately differentiated; Grade II	HR+/HER2- (Luminal A)	Positive	Positive	Negative	T2	N1a	M1	IV	Married (including common law)	Insured	No	No	No	51	Dead	54	Breast	Dead (attributable to this cancer dx)	Alive or dead due to cancer
96	White	White	Female	8500	Poorly differentiated; Grade III	HR+/HER2+ (Luminal B)	Positive	Negative	Positive	T2	N1	M1	IV	Widowed	Insured	No	Yes	Yes	0	Dead	1	Breast	Dead (attributable to this cancer dx)	Alive or dead due to cancer
56	White	White	Female	8500	Unknown	HR+/HER2- (Luminal A)	Positive	Positive	Negative	T4NOS	N1	M1	IV	Widowed	Insured	No	Yes	No	0	Dead	52	Breast	Dead (attributable to this cancer dx)	Alive or dead due to cancer
71	White	White	Female	8500	Unknown	HR+/HER2- (Luminal A)	Positive	Positive	Negative	T4a	N0	M1	IV	Single (never married)	Any Medicaid	No	No	No	0	Dead	1	Breast	Dead (attributable to this cancer dx)	Alive or dead due to cancer
67	White	White	Female	8500	Moderately differentiated; Grade II	HR+/HER2- (Luminal A)	Positive	Positive	Negative	T4b	N1	M1	IV	Single (never married)	Insured/No specifics	No	Yes	No	0	Dead	25	Breast	Dead (attributable to this cancer dx)	Alive or dead due to cancer
62	White	White	Female	8500	Moderately differentiated; Grade II	HR+/HER2- (Luminal A)	Positive	Negative	Negative	T2	N2a	M1	IV	Divorced	Insured	No	No	No	23	Alive	70	Alive	Alive or dead of other cause	Alive or dead due to cancer
52	White	White	Female	8500	Poorly differentiated; Grade III	HR+/HER2+ (Luminal B)	Positive	Positive	Positive	T2	N3c	M1	IV	Married (including common law)	Uninsured	No	Yes	Yes	20	Alive	69	Alive	Alive or dead of other cause	Alive or dead due to cancer
47	White	White	Female	8520	Unknown	HR+/HER2- (Luminal A)	Positive	Positive	Negative	T3	N2a	M1	IV	Married (including common law)	Insured	No	No	No	63	Dead	69	Breast	Dead (attributable to this cancer dx)	Alive or dead due to cancer
49	White	White	Female	8500	Moderately differentiated; Grade II	HR+/HER2- (Luminal A)	Positive	Positive	Negative	T2	N1	M1	IV	Single (never married)	Insured	No	No	No	0	Alive	69	Alive	Alive or dead of other cause	Alive or dead due to cancer
79	Black	Black	Female	8500	Poorly differentiated; Grade III	HR+/HER2+ (Luminal B)	Positive	Negative	Positive	T1c	N1	M1	IV	Divorced	Insured/No specifics	No	Yes	No	0	Alive	67	Alive	Alive or dead of other cause	Alive or dead due to cancer
78	White	White	Female	8520	Unknown	HR+/HER2- (Luminal A)	Positive	Negative	Negative	T3	N2NOS	M1	IV	Widowed	Insured	No	No	No	0	Dead	15	Breast	Dead (attributable to this cancer dx)	Alive or dead due to cancer
71	White	White	Female	8522	Moderately differentiated; Grade II	HR+/HER2- (Luminal A)	Positive	Positive	Negative	T4a	N0	M1	IV	Married (including common law)	Insured	No	No	No	0	Dead	44	Breast	Dead (attributable to this cancer dx)	Alive or dead due to cancer
58	White	White	Female	8140	Unknown	HR+/HER2+ (Luminal B)	Positive	Negative	Positive	T2	N0	M1	IV	Single (never married)	Any Medicaid	No	Yes	Yes	0	Dead	17	Diseases of Heart	Alive or dead of other cause	Dead (attributable to causes other than this cancer dx)
76	White	White	Female	8520	Moderately differentiated; Grade II	HR+/HER2- (Luminal A)	Positive	Positive	Negative	T3	N0	M1	IV	Widowed	Insured/No specifics	No	No	No	0	Alive	19	Alive	Alive or dead of other cause	Alive or dead due to cancer
63	White	White	Female	8500	Well differentiated; Grade I	HR+/HER2- (Luminal A)	Positive	Positive	Negative	T3	N1a	M1	IV	Divorced	Insured	No	No	No	51	Alive	67	Alive	Alive or dead of other cause	Alive or dead due to cancer
62	White	White	Female	8500	Poorly differentiated; Grade III	HR+/HER2- (Luminal A)	Positive	Positive	Negative	T2	N0	M1	IV	Married (including common law)	Insured	No	No	No	0	Dead	52	Breast	Dead (attributable to this cancer dx)	Alive or dead due to cancer
80	White	White	Female	8500	Moderately differentiated; Grade II	HR+/HER2- (Luminal A)	Positive	Positive	Negative	T2	N2a	M1	IV	Widowed	Insured	No	No	Yes	0	Dead	27	Breast	Dead (attributable to this cancer dx)	Alive or dead due to cancer
86	White	White	Female	8500	Poorly differentiated; Grade III	HR-/HER2- (Triple Negative)	Negative	Negative	Negative	T2	N1	M1	IV	Married (including common law)	Insured/No specifics	No	Yes	No	0	Dead	5	Breast	Dead (attributable to this cancer dx)	Alive or dead due to cancer
81	Black	Black	Female	8520	Unknown	HR+/HER2- (Luminal A)	Positive	Positive	Negative	T2	N1	M1	IV	Widowed	Insured	No	No	No	0	Dead	17	Breast	Dead (attributable to this cancer dx)	Alive or dead due to cancer
70	White	White	Female	8500	Poorly differentiated; Grade III	HR-/HER2- (Triple Negative)	Negative	Negative	Negative	T1c	N2NOS	M1	IV	Divorced	Insured	No	No	No	0	Dead	15	Breast	Dead (attributable to this cancer dx)	Alive or dead due to cancer
88	White	White	Female	8500	Poorly differentiated; Grade III	HR+/HER2- (Luminal A)	Positive	Negative	Negative	T4d	N2a	M1	IV	Widowed	Insured	No	Yes	No	0	Dead	7	Breast	Dead (attributable to this cancer dx)	Alive or dead due to cancer
81	White	White	Female	8500	Poorly differentiated; Grade III	HR+/HER2- (Luminal A)	Positive	Positive	Negative	T2	N1	M1	IV	Widowed	Insured	No	Yes	No	0	Dead	18	Breast	Dead (attributable to this cancer dx)	Alive or dead due to cancer
78	Black	Black	Female	8500	Moderately differentiated; Grade II	HR+/HER2- (Luminal A)	Positive	Positive	Negative	T4b	N2a	M1	IV	Widowed	Insured/No specifics	No	No	No	0	Dead	49	Breast	Dead (attributable to this cancer dx)	Alive or dead due to cancer
65	Black	Black	Female	8520	Unknown	HR+/HER2- (Luminal A)	Positive	Positive	Negative	T4b	N2a	M1	IV	Married (including common law)	Insured	No	No	No	0	Dead	10	Breast	Dead (attributable to this cancer dx)	Alive or dead due to cancer
76	White	White	Female	8500	Moderately differentiated; Grade II	HR+/HER2- (Luminal A)	Positive	Positive	Negative	T4b	N1NOS	M1	IV	Divorced	Insured	No	No	Yes	41	Alive	66	Alive	Alive or dead of other cause	Alive or dead due to cancer
85	White	White	Female	8480	Moderately differentiated; Grade II	HR+/HER2- (Luminal A)	Positive	Positive	Negative	T2	N0	M1	IV	Unknown	Insured	No	Yes	No	22	Dead	29	Breast	Dead (attributable to this cancer dx)	Alive or dead due to cancer
51	White	White	Female	8520	Poorly differentiated; Grade III	HR+/HER2- (Luminal A)	Positive	Positive	Negative	T3	N3a	M1	IV	Married (including common law)	Insured	No	No	No	54	Dead	36	Breast	Dead (attributable to this cancer dx)	Alive or dead due to cancer
69	Black	Black	Female	8010	Unknown	HR-/HER2- (Triple Negative)	Negative	Negative	Negative	T4d	N1	M1	IV	Widowed	Insured/No specifics	No	No	No	0	Dead	13	Breast	Dead (attributable to this cancer dx)	Alive or dead due to cancer
64	Black	Black	Female	8520	Unknown	HR+/HER2- (Luminal A)	Positive	Positive	Negative	T2	N1	M1	IV	Married (including common law)	Insured/No specifics	No	Yes	No	0	Alive	68	Alive	Alive or dead of other cause	Alive or dead due to cancer
40	Black	Black	Female	8500	Poorly differentiated; Grade III	HR-/HER2- (Triple Negative)	Negative	Negative	Negative	T4d	N2a	M1	IV	Divorced	Insured	No	Yes	No	51	Dead	15	Breast	Dead (attributable to this cancer dx)	Alive or dead due to cancer
71	Black	Black	Female	8500	Moderately differentiated; Grade II	HR+/HER2+ (Luminal B)	Positive	Negative	Positive	T2	N1a	M1	IV	Widowed	Any Medicaid	No	No	No	51	Dead	17	Diseases of Heart	Alive or dead of other cause	Dead (attributable to causes other than this cancer dx)
74	White	White	Female	8500	Well differentiated; Grade I	HR+/HER2- (Luminal A)	Positive	Positive	Negative	T1c	N1a	M1	IV	Married (including common law)	Insured	No	No	No	23	Alive	60	Alive	Alive or dead of other cause	Alive or dead due to cancer
41	White	White	Female	8500	Moderately differentiated; Grade II	HR+/HER2+ (Luminal B)	Positive	Negative	Positive	T2	N1	M1	IV	Married (including common law)	Insured	No	No	No	0	Alive	67	Alive	Alive or dead of other cause	Alive or dead due to cancer
93	White	White	Female	8500	Moderately differentiated; Grade II	HR+/HER2- (Luminal A)	Positive	Positive	Negative	T2	N1	M1	IV	Widowed	Insured	No	No	No	0	Dead	14	Breast	Dead (attributable to this cancer dx)	Alive or dead due to cancer
60	White	White	Female	8500	Moderately differentiated; Grade II	HR+/HER2- (Luminal A)	Positive	Positive	Negative	T4b	N1	M1	IV	Married (including common law)	Insured	No	No	No	51	Alive	61	Alive	Alive or dead of other cause	Alive or dead due to cancer
75	White	White	Female	8500	Poorly differentiated; Grade III	HR+/HER2+ (Luminal B)	Positive	Positive	Positive	T1c	N3a	M1	IV	Married (including common law)	Insured	Yes	No	No	51	Dead	51	Breast	Dead (attributable to this cancer dx)	Alive or dead due to cancer
65	White	White	Female	8500	Moderately differentiated; Grade II	HR+/HER2- (Luminal A)	Positive	Positive	Negative	T4b	N3b	M1	IV	Married (including common law)	Insured	No	No	Yes	0	Alive	64	Alive	Alive or dead of other cause	Alive or dead due to cancer
62	White	White	Female	8500	Moderately differentiated; Grade II	HR+/HER2- (Luminal A)	Positive	Negative	Negative	T2	N1a	M1	IV	Married (including common law)	Insured	No	No	Yes	22	Dead	53	Breast	Dead (attributable to this cancer dx)	Alive or dead due to cancer
58	White	White	Female	8520	Moderately differentiated; Grade II	HR+/HER2+ (Luminal B)	Positive	Positive	Positive	T2	N0(i-)	M1	IV	Married (including common law)	Insured	No	No	No	22	Dead	70	Breast	Dead (attributable to this cancer dx)	Alive or dead due to cancer
42	White	White	Female	8500	Moderately differentiated; Grade II	HR+/HER2- (Luminal A)	Positive	Positive	Negative	T4b	N1	M1	IV	Married (including common law)	Insured	No	No	Yes	0	Dead	37	Breast	Dead (attributable to this cancer dx)	Alive or dead due to cancer
38	White	White	Female	8500	Well differentiated; Grade I	HR+/HER2- (Luminal A)	Positive	Positive	Negative	T2	N3a	M1	IV	Single (never married)	Insured	No	No	No	51	Alive	62	Alive	Alive or dead of other cause	Alive or dead due to cancer
52	White	White	Female	8500	Poorly differentiated; Grade III	HR+/HER2+ (Luminal B)	Positive	Positive	Positive	T3	N1	M1	IV	Divorced	Any Medicaid	No	Yes	Yes	0	Dead	6	Breast	Dead (attributable to this cancer dx)	Alive or dead due to cancer
55	White	White	Female	8500	Poorly differentiated; Grade III	HR+/HER2- (Luminal A)	Positive	Positive	Negative	T4d	N1	M1	IV	Married (including common law)	Insured	No	No	Yes	0	Dead	21	Breast	Dead (attributable to this cancer dx)	Alive or dead due to cancer
72	White	White	Female	8500	Moderately differentiated; Grade II	HR+/HER2- (Luminal A)	Positive	Positive	Negative	T2	N0	M1	IV	Divorced	Insured/No specifics	No	No	No	0	Dead	7	Diseases of Heart	Alive or dead of other cause	Dead (attributable to causes other than this cancer dx)
68	White	White	Female	8500	Moderately differentiated; Grade II	HR-/HER2- (Triple Negative)	Negative	Negative	Negative	T2	N1	M1	IV	Widowed	Insured	No	Yes	Yes	0	Dead	2	Breast	Dead (attributable to this cancer dx)	Alive or dead due to cancer
70	White	White	Female	8500	Poorly differentiated; Grade III	HR-/HER2- (Triple Negative)	Negative	Negative	Negative	T4b	N2a	M1	IV	Married (including common law)	Insured	No	No	Yes	0	Dead	16	Breast	Dead (attributable to this cancer dx)	Alive or dead due to cancer
51	White	White	Female	8500	Well differentiated; Grade I	HR+/HER2- (Luminal A)	Positive	Positive	Negative	T2	N1a	M1	IV	Married (including common law)	Insured	No	No	No	20	Alive	58	Alive	Alive or dead of other cause	Alive or dead due to cancer
72	White	White	Female	8500	Unknown	HR+/HER2- (Luminal A)	Positive	Positive	Negative	T4c	N3a	M1	IV	Married (including common law)	Insured	No	Yes	Yes	0	Alive	67	Alive	Alive or dead of other cause	Alive or dead due to cancer
79	Black	Black	Female	8500	Poorly differentiated; Grade III	HR+/HER2- (Luminal A)	Positive	Negative	Negative	T2	N1	M1	IV	Widowed	Insured	No	No	Yes	0	Dead	22	Breast	Dead (attributable to this cancer dx)	Alive or dead due to cancer
62	White	White	Female	8500	Unknown	HR+/HER2- (Luminal A)	Positive	Positive	Negative	T4d	N3a	M1	IV	Single (never married)	Insured	No	No	No	0	Alive	61	Alive	Alive or dead of other cause	Alive or dead due to cancer
53	Black	Black	Female	8500	Moderately differentiated; Grade II	HR+/HER2- (Luminal A)	Positive	Positive	Negative	T2	N1	M1	IV	Single (never married)	Any Medicaid	No	Yes	No	0	Dead	24	Breast	Dead (attributable to this cancer dx)	Alive or dead due to cancer
55	White	White	Female	8500	Poorly differentiated; Grade III	HR+/HER2+ (Luminal B)	Positive	Negative	Positive	T4b	N1	M1	IV	Married (including common law)	Insured	No	Yes	Yes	0	Dead	28	Breast	Dead (attributable to this cancer dx)	Alive or dead due to cancer
70	Black	Black	Male	8500	Unknown	HR+/HER2- (Luminal A)	Positive	Negative	Negative	T4a	N3c	M1	IV	Unknown	Insured	No	Yes	No	0	Dead	14	Breast	Dead (attributable to this cancer dx)	Alive or dead due to cancer
76	White	White	Female	8500	Moderately differentiated; Grade II	HR+/HER2- (Luminal A)	Positive	Positive	Negative	T1c	N0	M1	IV	Widowed	Insured/No specifics	No	No	No	23	Alive	71	Alive	Alive or dead of other cause	Alive or dead due to cancer
59	Black	Black	Female	8500	Moderately differentiated; Grade II	HR+/HER2- (Luminal A)	Positive	Positive	Negative	T4a	N1	M1	IV	Married (including common law)	Insured	No	No	Yes	0	Dead	1	Breast	Dead (attributable to this cancer dx)	Alive or dead due to cancer
76	Black	Black	Female	8500	Poorly differentiated; Grade III	HR-/HER2- (Triple Negative)	Negative	Negative	Negative	T4c	N3c	M1	IV	Divorced	Any Medicaid	No	No	No	0	Dead	1	Breast	Dead (attributable to this cancer dx)	Alive or dead due to cancer
63	White	White	Female	8500	Moderately differentiated; Grade II	HR+/HER2- (Luminal A)	Positive	Positive	Negative	T3	N0	M1	IV	Single (never married)	Insured	No	No	Yes	0	Dead	37	Breast	Dead (attributable to this cancer dx)	Alive or dead due to cancer
57	Black	Black	Female	8500	Unknown	HR+/HER2- (Luminal A)	Negative	Positive	Negative	T3	N1	M1	IV	Unknown	Insured	No	No	Yes	0	Dead	18	Breast	Dead (attributable to this cancer dx)	Alive or dead due to cancer
58	White	White	Female	8500	Moderately differentiated; Grade II	HR+/HER2+ (Luminal B)	Positive	Positive	Positive	T2	N0	M1	IV	Married (including common law)	Insured	No	No	No	0	Dead	28	Breast	Dead (attributable to this cancer dx)	Alive or dead due to cancer
29	White	White	Female	8500	Poorly differentiated; Grade III	HR+/HER2- (Luminal A)	Positive	Positive	Negative	T2	N1a	M1	IV	Married (including common law)	Insurance status unknown	No	No	No	23	Dead	45	Breast	Dead (attributable to this cancer dx)	Alive or dead due to cancer
45	Other (American Indian/AK Native, Asian/Pacific Islander)	American Indian/Alaska Native	Female	8500	Moderately differentiated; Grade II	HR+/HER2- (Luminal A)	Positive	Negative	Negative	T2	N1c	M1	IV	Married (including common law)	Insured	No	No	No	63	Dead	42	Breast	Dead (attributable to this cancer dx)	Alive or dead due to cancer
76	Black	Black	Female	8500	Poorly differentiated; Grade III	HR+/HER2+ (Luminal B)	Positive	Negative	Positive	T3	N0(i+)	M1	IV	Divorced	Insured	No	No	No	51	Dead	30	Breast	Dead (attributable to this cancer dx)	Alive or dead due to cancer
80	White	White	Female	8500	Moderately differentiated; Grade II	HR+/HER2- (Luminal A)	Positive	Positive	Negative	T1mic	N0	M1	IV	Widowed	Insured	No	No	Yes	0	Dead	4	Breast	Dead (attributable to this cancer dx)	Alive or dead due to cancer
78	Black	Black	Female	8500	Moderately differentiated; Grade II	HR+/HER2- (Luminal A)	Positive	Negative	Negative	T2	N1	M1	IV	Widowed	Insured/No specifics	No	No	Yes	0	Dead	22	Breast	Dead (attributable to this cancer dx)	Alive or dead due to cancer
56	White	White	Female	8500	Unknown	HR+/HER2+ (Luminal B)	Positive	Negative	Positive	T2	N2a	M1	IV	Married (including common law)	Insured	No	Yes	No	0	Dead	33	Breast	Dead (attributable to this cancer dx)	Alive or dead due to cancer
87	White	White	Female	8522	Well differentiated; Grade I	HR+/HER2- (Luminal A)	Positive	Positive	Negative	T2	N0	M1	IV	Widowed	Insured	No	No	No	0	Dead	25	Breast	Dead (attributable to this cancer dx)	Alive or dead due to cancer
56	White	White	Female	8500	Poorly differentiated; Grade III	HR+/HER2- (Luminal A)	Positive	Positive	Negative	T3	N1	M1	IV	Unknown	Insured	No	No	No	22	Dead	47	Breast	Dead (attributable to this cancer dx)	Alive or dead due to cancer
41	White	White	Female	8500	Poorly differentiated; Grade III	HR+/HER2- (Luminal A)	Positive	Positive	Negative	T4d	N1	M1	IV	Married (including common law)	Insured	No	No	No	51	Alive	68	Alive	Alive or dead of other cause	Alive or dead due to cancer
75	Black	Black	Female	8520	Unknown	HR+/HER2- (Luminal A)	Positive	Positive	Negative	T2	N1	M1	IV	Single (never married)	Insured/No specifics	No	No	No	0	Alive	55	Alive	Alive or dead of other cause	Alive or dead due to cancer
63	White	White	Female	8500	Well differentiated; Grade I	HR+/HER2- (Luminal A)	Positive	Positive	Negative	T1c	N0(i-)	M1	IV	Married (including common law)	Insured	No	No	No	41	Alive	33	Alive	Alive or dead of other cause	Alive or dead due to cancer
78	White	White	Female	8500	Poorly differentiated; Grade III	HR+/HER2- (Luminal A)	Positive	Negative	Negative	T1c	N1	M1	IV	Divorced	Insured	No	No	Yes	0	Dead	4	Breast	Dead (attributable to this cancer dx)	Alive or dead due to cancer
78	White	White	Female	8500	Moderately differentiated; Grade II	HR+/HER2- (Luminal A)	Negative	Positive	Negative	T2	N0	M1	IV	Divorced	Any Medicaid	No	Yes	No	0	Dead	1	Breast	Dead (attributable to this cancer dx)	Alive or dead due to cancer
65	White	White	Female	8500	Poorly differentiated; Grade III	HR+/HER2- (Luminal A)	Positive	Positive	Negative	T2	N1	M1	IV	Married (including common law)	Insured	No	No	No	0	Dead	27	Breast	Dead (attributable to this cancer dx)	Alive or dead due to cancer
65	White	White	Female	8500	Poorly differentiated; Grade III	HR+/HER2- (Luminal A)	Positive	Positive	Negative	T1c	N0	M1	IV	Married (including common law)	Insured	No	No	No	51	Alive	61	Alive	Alive or dead of other cause	Alive or dead due to cancer
54	White	White	Female	8500	Moderately differentiated; Grade II	HR+/HER2- (Luminal A)	Positive	Positive	Negative	T2	N1	M1	IV	Widowed	Insured	Yes	Yes	Yes	0	Dead	62	Breast	Dead (attributable to this cancer dx)	Alive or dead due to cancer
58	White	White	Female	8010	Unknown	HR+/HER2- (Luminal A)	Positive	Positive	Negative	T4b	N3a	M1	IV	Divorced	Insured	No	No	Yes	0	Dead	49	Breast	Dead (attributable to this cancer dx)	Alive or dead due to cancer
53	White	White	Female	8500	Poorly differentiated; Grade III	HR+/HER2- (Luminal A)	Positive	Positive	Negative	T4d	N3c	M1	IV	Unknown	Insured	No	No	No	51	Alive	64	Alive	Alive or dead of other cause	Alive or dead due to cancer
81	White	White	Female	8500	Moderately differentiated; Grade II	HR+/HER2- (Luminal A)	Positive	Positive	Negative	T2	N0(i-)	M1	IV	Widowed	Any Medicaid	No	No	No	22	Alive	60	Alive	Alive or dead of other cause	Alive or dead due to cancer
69	White	White	Female	8520	Moderately differentiated; Grade II	HR+/HER2- (Luminal A)	Positive	Positive	Negative	T2	N3a	M1	IV	Married (including common law)	Insured	No	No	No	59	Dead	62	Breast	Dead (attributable to this cancer dx)	Alive or dead due to cancer
61	White	White	Female	8500	Poorly differentiated; Grade III	HR+/HER2- (Luminal A)	Positive	Positive	Negative	T4b	N3c	M1	IV	Married (including common law)	Insured	Yes	No	No	51	Dead	38	Symptoms, Signs and Ill-Defined Conditions	Alive or dead of other cause	Dead (attributable to causes other than this cancer dx)
57	White	White	Female	8500	Poorly differentiated; Grade III	HR-/HER2- (Triple Negative)	Negative	Negative	Negative	T2	N0	M1	IV	Single (never married)	Insured	No	No	No	22	Alive	53	Alive	Alive or dead of other cause	Alive or dead due to cancer
73	White	White	Female	8500	Poorly differentiated; Grade III	HR+/HER2- (Luminal A)	Positive	Negative	Negative	T2	N0	M1	IV	Married (including common law)	Insured	No	No	Yes	0	Dead	29	Breast	Dead (attributable to this cancer dx)	Alive or dead due to cancer
59	Black	Black	Female	8500	Moderately differentiated; Grade II	HR+/HER2+ (Luminal B)	Positive	Positive	Positive	T4a	N1	M1	IV	Married (including common law)	Insured	No	No	Yes	0	Alive	57	Alive	Alive or dead of other cause	Alive or dead due to cancer
76	White	White	Female	8500	Poorly differentiated; Grade III	HR-/HER2+ (HER2 enriched)	Negative	Negative	Positive	T3	N2a	M1	IV	Married (including common law)	Insured	No	No	Yes	0	Dead	1	Other Cause of Death	Alive or dead of other cause	Dead (attributable to causes other than this cancer dx)
78	White	White	Female	8522	Well differentiated; Grade I	HR+/HER2- (Luminal A)	Positive	Positive	Negative	T2	N0	M1	IV	Divorced	Insured	No	No	No	0	Dead	1	Cerebrovascular Diseases	Alive or dead of other cause	Dead (attributable to causes other than this cancer dx)
80	White	White	Female	8500	Unknown	HR+/HER2- (Luminal A)	Positive	Negative	Negative	T2	N1	M1	IV	Unknown	Insured	No	No	No	0	Dead	55	Breast	Dead (attributable to this cancer dx)	Alive or dead due to cancer
59	White	White	Female	8520	Moderately differentiated; Grade II	HR+/HER2- (Luminal A)	Positive	Positive	Negative	T3	N3a	M1	IV	Married (including common law)	Insured	No	No	No	51	Dead	41	Breast	Dead (attributable to this cancer dx)	Alive or dead due to cancer
62	White	White	Female	8523	Moderately differentiated; Grade II	HR+/HER2- (Luminal A)	Positive	Positive	Negative	T4a	N0(i-)	M1	IV	Widowed	Insured	No	No	Yes	41	Dead	31	Breast	Dead (attributable to this cancer dx)	Alive or dead due to cancer
54	Other (American Indian/AK Native, Asian/Pacific Islander)	Asian or Pacific Islander	Female	8500	Poorly differentiated; Grade III	HR+/HER2+ (Luminal B)	Positive	Negative	Positive	T2	N3c	M1	IV	Married (including common law)	Insured	No	No	No	22	Dead	32	Breast	Dead (attributable to this cancer dx)	Alive or dead due to cancer
73	White	White	Female	8500	Poorly differentiated; Grade III	HR+/HER2- (Luminal A)	Positive	Negative	Negative	T4b	N3a	M1	IV	Married (including common law)	Insured	No	No	Yes	0	Dead	32	Breast	Dead (attributable to this cancer dx)	Alive or dead due to cancer
50	White	White	Female	8500	Poorly differentiated; Grade III	HR+/HER2+ (Luminal B)	Positive	Positive	Positive	T1c	N1	M1	IV	Married (including common law)	Insured	No	No	Yes	0	Alive	49	Alive	Alive or dead of other cause	Alive or dead due to cancer
84	White	White	Female	8520	Well differentiated; Grade I	HR+/HER2- (Luminal A)	Positive	Positive	Negative	T2	N1	M1	IV	Widowed	Insured	No	No	No	0	Dead	22	Breast	Dead (attributable to this cancer dx)	Alive or dead due to cancer
63	White	White	Female	8500	Well differentiated; Grade I	HR+/HER2- (Luminal A)	Positive	Positive	Negative	T2	N0	M1	IV	Divorced	Insured/No specifics	No	No	No	0	Alive	56	Alive	Alive or dead of other cause	Alive or dead due to cancer
52	Black	Black	Female	8524	Unknown	HR+/HER2+ (Luminal B)	Positive	Positive	Positive	T4b	N1	M1	IV	Single (never married)	Insured	No	Yes	Yes	0	Alive	51	Alive	Alive or dead of other cause	Alive or dead due to cancer
69	White	White	Female	8500	Moderately differentiated; Grade II	HR+/HER2- (Luminal A)	Positive	Positive	Negative	T2	N0	M1	IV	Divorced	Insured/No specifics	No	No	Yes	0	Dead	15	Breast	Dead (attributable to this cancer dx)	Alive or dead due to cancer
65	White	White	Female	8500	Poorly differentiated; Grade III	HR-/HER2- (Triple Negative)	Negative	Negative	Negative	T3	N1	M1	IV	Unknown	Insured/No specifics	No	No	No	0	Dead	3	Breast	Dead (attributable to this cancer dx)	Alive or dead due to cancer
69	White	White	Female	8520	Well differentiated; Grade I	HR+/HER2- (Luminal A)	Positive	Negative	Negative	T4b	N2NOS	M1	IV	Married (including common law)	Insured	No	No	No	0	Dead	2	Breast	Dead (attributable to this cancer dx)	Alive or dead due to cancer
84	White	White	Female	8480	Moderately differentiated; Grade II	HR+/HER2- (Luminal A)	Positive	Positive	Negative	T1b	N1	M1	IV	Widowed	Insured	No	Yes	No	0	Dead	8	Breast	Dead (attributable to this cancer dx)	Alive or dead due to cancer
76	White	White	Female	8520	Poorly differentiated; Grade III	HR+/HER2- (Luminal A)	Positive	Positive	Negative	T2	N0	M1	IV	Widowed	Insured	No	Yes	Yes	0	Dead	36	Chronic Obstructive Pulmonary Disease and Allied Cond	Alive or dead of other cause	Dead (attributable to causes other than this cancer dx)
64	White	White	Female	8500	Poorly differentiated; Grade III	HR+/HER2- (Luminal A)	Positive	Negative	Negative	T4d	N0	M1	IV	Married (including common law)	Insured	No	No	No	0	Alive	48	Alive	Alive or dead of other cause	Alive or dead due to cancer
66	White	White	Female	8500	Poorly differentiated; Grade III	HR+/HER2+ (Luminal B)	Positive	Positive	Positive	T4b	N1	M1	IV	Married (including common law)	Insured	No	Yes	Yes	0	Dead	4	Breast	Dead (attributable to this cancer dx)	Alive or dead due to cancer
69	White	White	Female	8500	Moderately differentiated; Grade II	HR+/HER2- (Luminal A)	Positive	Positive	Negative	T2	N0	M1	IV	Single (never married)	Insured	No	No	No	0	Dead	2	Breast	Dead (attributable to this cancer dx)	Alive or dead due to cancer
34	White	White	Female	8522	Poorly differentiated; Grade III	HR+/HER2+ (Luminal B)	Positive	Negative	Positive	T4b	N1	M1	IV	Single (never married)	Insured	No	No	No	0	Alive	50	Alive	Alive or dead of other cause	Alive or dead due to cancer
68	White	White	Female	8500	Poorly differentiated; Grade III	HR+/HER2- (Luminal A)	Positive	Positive	Negative	T4d	N2a	M1	IV	Single (never married)	Insured	No	No	No	56	Dead	21	Breast	Dead (attributable to this cancer dx)	Alive or dead due to cancer
35	White	White	Female	8500	Poorly differentiated; Grade III	HR+/HER2+ (Luminal B)	Positive	Positive	Positive	T2	N0	M1	IV	Married (including common law)	Insured	No	No	No	51	Alive	55	Alive	Alive or dead of other cause	Alive or dead due to cancer
54	Black	Black	Female	8500	Poorly differentiated; Grade III	HR+/HER2+ (Luminal B)	Positive	Negative	Positive	T3	N1	M1	IV	Single (never married)	Insured	No	Yes	No	0	Alive	50	Alive	Alive or dead of other cause	Alive or dead due to cancer
57	Black	Black	Female	8500	Poorly differentiated; Grade III	HR-/HER2- (Triple Negative)	Negative	Negative	Negative	T4d	N1NOS	M1	IV	Single (never married)	Insured	No	No	No	0	Dead	11	Diseases of Heart	Alive or dead of other cause	Dead (attributable to causes other than this cancer dx)
80	Black	Black	Female	8500	Poorly differentiated; Grade III	HR-/HER2- (Triple Negative)	Negative	Negative	Negative	T4b	N1	M1	IV	Widowed	Insured	No	No	No	41	Dead	10	Breast	Dead (attributable to this cancer dx)	Alive or dead due to cancer
53	White	White	Male	8500	Well differentiated; Grade I	HR+/HER2- (Luminal A)	Positive	Positive	Negative	T4b	N2a	M1	IV	Single (never married)	Any Medicaid	No	No	No	51	Alive	53	Alive	Alive or dead of other cause	Alive or dead due to cancer
71	White	White	Female	8500	Moderately differentiated; Grade II	HR+/HER2- (Luminal A)	Positive	Positive	Negative	T2	N0	M1	IV	Married (including common law)	Insured/No specifics	No	No	No	22	Dead	49	Breast	Dead (attributable to this cancer dx)	Alive or dead due to cancer
51	White	White	Female	8500	Moderately differentiated; Grade II	HR+/HER2- (Luminal A)	Positive	Positive	Negative	T2	N3a	M1	IV	Single (never married)	Insured	No	No	No	22	Alive	50	Alive	Alive or dead of other cause	Alive or dead due to cancer
71	White	White	Female	8520	Moderately differentiated; Grade II	HR+/HER2- (Luminal A)	Positive	Positive	Negative	T3	N1	M1	IV	Married (including common law)	Insured	No	Yes	No	0	Dead	1	Breast	Dead (attributable to this cancer dx)	Alive or dead due to cancer
77	White	White	Female	8520	Unknown	HR+/HER2- (Luminal A)	Positive	Positive	Negative	T1c	N0	M1	IV	Widowed	Insured	No	No	No	0	Dead	5	Breast	Dead (attributable to this cancer dx)	Alive or dead due to cancer
56	White	White	Female	8523	Moderately differentiated; Grade II	HR+/HER2- (Luminal A)	Positive	Positive	Negative	T2	N1	M1	IV	Married (including common law)	Any Medicaid	No	No	No	0	Dead	23	Breast	Dead (attributable to this cancer dx)	Alive or dead due to cancer
66	Black	Black	Female	8500	Poorly differentiated; Grade III	HR+/HER2- (Luminal A)	Positive	Positive	Negative	T4b	N1	M1	IV	Divorced	Insured	No	No	Yes	0	Dead	39	Breast	Dead (attributable to this cancer dx)	Alive or dead due to cancer
55	Black	Black	Female	8500	Poorly differentiated; Grade III	HR+/HER2+ (Luminal B)	Positive	Positive	Positive	T2	N1	M1	IV	Widowed	Insured/No specifics	No	Yes	No	0	Alive	45	Alive	Alive or dead of other cause	Alive or dead due to cancer
62	White	White	Female	8522	Well differentiated; Grade I	HR+/HER2- (Luminal A)	Positive	Negative	Negative	T2	N1	M1	IV	Married (including common law)	Insured	No	No	No	0	Dead	26	Breast	Dead (attributable to this cancer dx)	Alive or dead due to cancer
54	White	White	Female	8500	Moderately differentiated; Grade II	HR+/HER2+ (Luminal B)	Positive	Negative	Positive	T1b	N1	M1	IV	Divorced	Insured	No	No	No	22	Alive	48	Alive	Alive or dead of other cause	Alive or dead due to cancer
70	White	White	Female	8500	Unknown	HR+/HER2- (Luminal A)	Positive	Positive	Negative	T2	N1	M1	IV	Married (including common law)	Insured	No	No	No	0	Dead	32	Breast	Dead (attributable to this cancer dx)	Alive or dead due to cancer
63	White	White	Female	8500	Moderately differentiated; Grade II	HR-/HER2+ (HER2 enriched)	Negative	Negative	Positive	T4d	N1	M1	IV	Divorced	Insured	No	Yes	No	0	Dead	50	Breast	Dead (attributable to this cancer dx)	Alive or dead due to cancer
49	White	White	Female	8500	Poorly differentiated; Grade III	HR-/HER2+ (HER2 enriched)	Negative	Negative	Positive	T4b	N2a	M1	IV	Single (never married)	Any Medicaid	No	Yes	No	0	Dead	26	Breast	Dead (attributable to this cancer dx)	Alive or dead due to cancer
40	White	White	Female	8500	Poorly differentiated; Grade III	HR+/HER2- (Luminal A)	Positive	Positive	Negative	T2	N1	M1	IV	Married (including common law)	Insured	No	No	No	63	Alive	48	Alive	Alive or dead of other cause	Alive or dead due to cancer
49	White	White	Female	8522	Poorly differentiated; Grade III	HR+/HER2+ (Luminal B)	Positive	Positive	Positive	T2	N3a	M1	IV	Married (including common law)	Insured	No	No	No	56	Alive	49	Alive	Alive or dead of other cause	Alive or dead due to cancer
66	Black	Black	Female	8522	Unknown	HR+/HER2- (Luminal A)	Positive	Positive	Negative	T2	N0	M1	IV	Divorced	Insured/No specifics	No	No	Yes	0	Dead	12	Breast	Dead (attributable to this cancer dx)	Alive or dead due to cancer
59	Black	Black	Female	8500	Poorly differentiated; Grade III	HR+/HER2+ (Luminal B)	Positive	Negative	Positive	T2	N0	M1	IV	Single (never married)	Insured	No	No	No	0	Alive	50	Alive	Alive or dead of other cause	Alive or dead due to cancer
55	Black	Black	Female	8500	Moderately differentiated; Grade II	HR-/HER2+ (HER2 enriched)	Negative	Negative	Positive	T2	N1	M1	IV	Single (never married)	Any Medicaid	No	Yes	Yes	0	Alive	54	Alive	Alive or dead of other cause	Alive or dead due to cancer
71	White	White	Female	8500	Moderately differentiated; Grade II	HR+/HER2- (Luminal A)	Positive	Positive	Negative	T2	N1NOS	M1	IV	Married (including common law)	Any Medicaid	No	Yes	Yes	0	Dead	28	Breast	Dead (attributable to this cancer dx)	Alive or dead due to cancer
58	Black	Black	Female	8500	Moderately differentiated; Grade II	HR+/HER2- (Luminal A)	Positive	Positive	Negative	T2	N1	M1	IV	Divorced	Insured	No	No	No	0	Alive	48	Alive	Alive or dead of other cause	Alive or dead due to cancer
39	Black	Black	Female	8500	Moderately differentiated; Grade II	HR-/HER2+ (HER2 enriched)	Negative	Negative	Positive	T2	N1	M1	IV	Divorced	Uninsured	No	No	No	22	Alive	49	Alive	Alive or dead of other cause	Alive or dead due to cancer
56	White	White	Female	8500	Moderately differentiated; Grade II	HR+/HER2- (Luminal A)	Positive	Positive	Negative	T4a	N3a	M1	IV	Divorced	Any Medicaid	No	No	Yes	0	Dead	16	Lung and Bronchus	Alive or dead of other cause	Dead (attributable to causes other than this cancer dx)
67	White	White	Female	8500	Poorly differentiated; Grade III	HR-/HER2- (Triple Negative)	Negative	Negative	Negative	T2	N1	M1	IV	Married (including common law)	Insured	No	No	No	0	Dead	12	Breast	Dead (attributable to this cancer dx)	Alive or dead due to cancer
63	Other (American Indian/AK Native, Asian/Pacific Islander)	Asian or Pacific Islander	Female	8500	Poorly differentiated; Grade III	HR-/HER2+ (HER2 enriched)	Negative	Negative	Positive	T2	N1	M1	IV	Single (never married)	Insured	No	Yes	Yes	0	Alive	47	Alive	Alive or dead of other cause	Alive or dead due to cancer
62	White	White	Female	8500	Poorly differentiated; Grade III	HR-/HER2- (Triple Negative)	Negative	Negative	Negative	T4b	N1	M1	IV	Married (including common law)	Insured	Yes	Yes	Yes	0	Dead	11	Breast	Dead (attributable to this cancer dx)	Alive or dead due to cancer
39	White	White	Female	8500	Moderately differentiated; Grade II	HR-/HER2- (Triple Negative)	Negative	Negative	Negative	T4b	N1	M1	IV	Single (never married)	Insured	No	No	No	0	Dead	14	Breast	Dead (attributable to this cancer dx)	Alive or dead due to cancer
67	White	White	Female	8520	Moderately differentiated; Grade II	HR+/HER2- (Luminal A)	Positive	Positive	Negative	T2	N3a	M1	IV	Married (including common law)	Insured	No	No	No	51	Alive	47	Alive	Alive or dead of other cause	Alive or dead due to cancer
68	Other (American Indian/AK Native, Asian/Pacific Islander)	American Indian/Alaska Native	Female	8522	Unknown	HR+/HER2- (Luminal A)	Positive	Positive	Negative	T2	N1	M1	IV	Married (including common law)	Insured	No	No	No	22	Alive	46	Alive	Alive or dead of other cause	Alive or dead due to cancer
83	Black	Black	Female	8523	Poorly differentiated; Grade III	HR+/HER2- (Luminal A)	Positive	Negative	Negative	T2	N2b	M1	IV	Single (never married)	Any Medicaid	No	No	No	0	Dead	43	Lung and Bronchus	Alive or dead of other cause	Dead (attributable to causes other than this cancer dx)
69	White	White	Female	8500	Poorly differentiated; Grade III	HR+/HER2- (Luminal A)	Positive	Negative	Negative	T3	N1	M1	IV	Unknown	Insured	No	No	No	0	Dead	21	Breast	Dead (attributable to this cancer dx)	Alive or dead due to cancer
56	White	White	Female	8500	Moderately differentiated; Grade II	HR+/HER2- (Luminal A)	Positive	Positive	Negative	T2	N3c	M1	IV	Married (including common law)	Insured	No	No	No	22	Dead	45	Breast	Dead (attributable to this cancer dx)	Alive or dead due to cancer
48	White	White	Female	8522	Poorly differentiated; Grade III	HR+/HER2+ (Luminal B)	Positive	Positive	Positive	T2	N0	M1	IV	Married (including common law)	Insured	No	No	No	0	Alive	45	Alive	Alive or dead of other cause	Alive or dead due to cancer
81	White	White	Female	8500	Unknown	HR+/HER2- (Luminal A)	Positive	Positive	Negative	T2	N0	M1	IV	Unknown	Insured	No	No	No	0	Dead	3	Breast	Dead (attributable to this cancer dx)	Alive or dead due to cancer
65	White	White	Female	8500	Poorly differentiated; Grade III	HR-/HER2- (Triple Negative)	Negative	Negative	Negative	T4a	N3c	M1	IV	Married (including common law)	Insured	No	Yes	No	0	Dead	11	Breast	Dead (attributable to this cancer dx)	Alive or dead due to cancer
53	Black	Black	Female	8523	Poorly differentiated; Grade III	HR+/HER2+ (Luminal B)	Positive	Positive	Positive	T3	N0	M1	IV	Single (never married)	Insured	No	Yes	Yes	0	Dead	27	Breast	Dead (attributable to this cancer dx)	Alive or dead due to cancer
56	White	White	Female	8500	Moderately differentiated; Grade II	HR+/HER2- (Luminal A)	Positive	Positive	Negative	T4b	N0	M1	IV	Married (including common law)	Insured/No specifics	No	Yes	Yes	0	Dead	7	Breast	Dead (attributable to this cancer dx)	Alive or dead due to cancer
49	Black	Black	Female	8500	Poorly differentiated; Grade III	HR-/HER2- (Triple Negative)	Negative	Negative	Negative	T2	N2a	M1	IV	Single (never married)	Any Medicaid	No	No	No	22	Alive	44	Alive	Alive or dead of other cause	Alive or dead due to cancer
56	White	White	Female	8500	Moderately differentiated; Grade II	HR+/HER2- (Luminal A)	Positive	Positive	Negative	T4b	N0	M1	IV	Married (including common law)	Insured	No	No	No	46	Alive	51	Alive	Alive or dead of other cause	Alive or dead due to cancer
86	White	White	Female	8500	Moderately differentiated; Grade II	HR+/HER2- (Luminal A)	Positive	Positive	Negative	T1c	N0	M1	IV	Married (including common law)	Insured	No	No	No	22	Dead	17	Breast	Dead (attributable to this cancer dx)	Alive or dead due to cancer
65	White	White	Female	8500	Moderately differentiated; Grade II	HR+/HER2- (Luminal A)	Positive	Positive	Negative	T4c	N2a	M1	IV	Married (including common law)	Insured	No	Yes	Yes	0	Alive	44	Alive	Alive or dead of other cause	Alive or dead due to cancer
49	White	White	Female	8500	Moderately differentiated; Grade II	HR+/HER2+ (Luminal B)	Positive	Positive	Positive	T1c	N0	M1	IV	Married (including common law)	Insured	No	No	No	0	Alive	44	Alive	Alive or dead of other cause	Alive or dead due to cancer
60	White	White	Female	8500	Unknown	HR+/HER2- (Luminal A)	Positive	Positive	Negative	T4NOS	N1	M1	IV	Widowed	Insured	No	No	No	0	Dead	23	Breast	Dead (attributable to this cancer dx)	Alive or dead due to cancer
55	White	White	Male	8500	Moderately differentiated; Grade II	HR+/HER2+ (Luminal B)	Positive	Positive	Positive	T2	N0	M1	IV	Single (never married)	Insured	No	Yes	No	0	Dead	34	Breast	Dead (attributable to this cancer dx)	Alive or dead due to cancer
69	Black	Black	Female	8500	Moderately differentiated; Grade II	HR+/HER2- (Luminal A)	Positive	Positive	Negative	T3	N1	M1	IV	Unknown	Insured	Yes	No	No	0	Dead	8	Breast	Dead (attributable to this cancer dx)	Alive or dead due to cancer
77	White	White	Female	8500	Moderately differentiated; Grade II	HR+/HER2- (Luminal A)	Positive	Positive	Negative	T2	N0	M1	IV	Widowed	Insured	No	No	No	0	Dead	14	Breast	Dead (attributable to this cancer dx)	Alive or dead due to cancer
54	Black	Black	Female	8500	Poorly differentiated; Grade III	HR+/HER2+ (Luminal B)	Positive	Negative	Positive	T2	N1	M1	IV	Married (including common law)	Insured	No	No	No	51	Alive	42	Alive	Alive or dead of other cause	Alive or dead due to cancer
66	Other (American Indian/AK Native, Asian/Pacific Islander)	Asian or Pacific Islander	Female	8500	Moderately differentiated; Grade II	HR+/HER2- (Luminal A)	Positive	Positive	Negative	T4b	N1	M1	IV	Married (including common law)	Insured	No	No	No	51	Alive	42	Alive	Alive or dead of other cause	Alive or dead due to cancer
84	White	White	Female	8500	Poorly differentiated; Grade III	HR+/HER2+ (Luminal B)	Positive	Positive	Positive	T4b	N3a	M1	IV	Widowed	Insured	No	Yes	No	0	Dead	20	Breast	Dead (attributable to this cancer dx)	Alive or dead due to cancer
59	White	White	Female	8520	Well differentiated; Grade I	HR+/HER2- (Luminal A)	Positive	Negative	Negative	T4b	N1a	M1	IV	Married (including common law)	Insured	No	No	No	51	Alive	50	Alive	Alive or dead of other cause	Alive or dead due to cancer
42	White	White	Female	8500	Moderately differentiated; Grade II	HR+/HER2+ (Luminal B)	Positive	Positive	Positive	T3	N1	M1	IV	Married (including common law)	Any Medicaid	No	No	No	52	Alive	39	Alive	Alive or dead of other cause	Alive or dead due to cancer
71	Other (American Indian/AK Native, Asian/Pacific Islander)	Asian or Pacific Islander	Female	8500	Unknown	HR+/HER2+ (Luminal B)	Positive	Positive	Positive	T2	N0	M1	IV	Widowed	Insured/No specifics	Yes	No	No	0	Dead	3	Breast	Dead (attributable to this cancer dx)	Alive or dead due to cancer
55	White	White	Female	8500	Moderately differentiated; Grade II	HR+/HER2- (Luminal A)	Positive	Negative	Negative	T3	N1a	M1	IV	Unknown	Insured	No	No	No	51	Dead	45	Breast	Dead (attributable to this cancer dx)	Alive or dead due to cancer
72	Black	Black	Female	8500	Poorly differentiated; Grade III	HR-/HER2- (Triple Negative)	Negative	Negative	Negative	T4c	N3a	M1	IV	Married (including common law)	Insured/No specifics	No	No	No	51	Dead	21	Breast	Dead (attributable to this cancer dx)	Alive or dead due to cancer
56	White	White	Female	8140	Unknown	HR+/HER2- (Luminal A)	Positive	Positive	Negative	T1b	N1	M1	IV	Married (including common law)	Uninsured	No	No	No	0	Alive	39	Alive	Alive or dead of other cause	Alive or dead due to cancer
55	White	White	Female	8500	Moderately differentiated; Grade II	HR+/HER2- (Luminal A)	Positive	Positive	Negative	T4b	N1	M1	IV	Single (never married)	Insured	No	Yes	Yes	0	Dead	28	Septicemia	Alive or dead of other cause	Dead (attributable to causes other than this cancer dx)
90	White	White	Female	8520	Moderately differentiated; Grade II	HR+/HER2- (Luminal A)	Positive	Negative	Negative	T4b	N1	M1	IV	Married (including common law)	Insured/No specifics	No	Yes	No	22	Dead	1	Breast	Dead (attributable to this cancer dx)	Alive or dead due to cancer
52	White	White	Female	8523	Moderately differentiated; Grade II	HR+/HER2+ (Luminal B)	Positive	Positive	Positive	T3	N1	M1	IV	Divorced	Insured	No	No	No	0	Alive	40	Alive	Alive or dead of other cause	Alive or dead due to cancer
45	White	White	Female	8500	Moderately differentiated; Grade II	HR+/HER2- (Luminal A)	Positive	Positive	Negative	T3	N0	M1	IV	Married (including common law)	Insured	No	No	No	0	Alive	40	Alive	Alive or dead of other cause	Alive or dead due to cancer
65	White	White	Female	8500	Moderately differentiated; Grade II	HR-/HER2- (Triple Negative)	Negative	Negative	Negative	T4b	N3NOS	M1	IV	Married (including common law)	Insured/No specifics	No	Yes	No	0	Dead	6	Breast	Dead (attributable to this cancer dx)	Alive or dead due to cancer
66	White	White	Female	8500	Poorly differentiated; Grade III	HR-/HER2+ (HER2 enriched)	Negative	Negative	Positive	T1c	N0	M1	IV	Married (including common law)	Insured	Yes	No	Yes	0	Dead	4	Diseases of Heart	Alive or dead of other cause	Dead (attributable to causes other than this cancer dx)
45	White	White	Female	8500	Poorly differentiated; Grade III	HR+/HER2- (Luminal A)	Positive	Positive	Negative	T4b	N0	M1	IV	Divorced	Any Medicaid	No	No	No	0	Dead	1	Breast	Dead (attributable to this cancer dx)	Alive or dead due to cancer
49	White	White	Female	8500	Well differentiated; Grade I	HR+/HER2- (Luminal A)	Positive	Positive	Negative	T1c	N1	M1	IV	Single (never married)	Uninsured	No	No	Yes	0	Dead	26	Breast	Dead (attributable to this cancer dx)	Alive or dead due to cancer
84	White	White	Female	8500	Moderately differentiated; Grade II	HR+/HER2- (Luminal A)	Positive	Positive	Negative	T2	N0	M1	IV	Married (including common law)	Insured	No	Yes	Yes	0	Alive	39	Alive	Alive or dead of other cause	Alive or dead due to cancer
66	White	White	Female	8500	Poorly differentiated; Grade III	HR+/HER2- (Luminal A)	Positive	Positive	Negative	T3	N0	M1	IV	Married (including common law)	Insured/No specifics	No	No	No	22	Dead	20	Symptoms, Signs and Ill-Defined Conditions	Alive or dead of other cause	Dead (attributable to causes other than this cancer dx)
76	Black	Black	Female	8500	Poorly differentiated; Grade III	HR+/HER2- (Luminal A)	Positive	Positive	Negative	T4b	N1	M1	IV	Widowed	Any Medicaid	No	No	No	0	Dead	3	Breast	Dead (attributable to this cancer dx)	Alive or dead due to cancer
49	White	White	Female	8500	Poorly differentiated; Grade III	HR+/HER2- (Luminal A)	Positive	Positive	Negative	T4b	N2a	M1	IV	Divorced	Insured/No specifics	No	No	No	52	Alive	41	Alive	Alive or dead of other cause	Alive or dead due to cancer
49	Other (American Indian/AK Native, Asian/Pacific Islander)	Asian or Pacific Islander	Female	8500	Moderately differentiated; Grade II	HR+/HER2- (Luminal A)	Positive	Positive	Negative	T4b	N2a	M1	IV	Single (never married)	Insured/No specifics	No	No	No	51	Alive	34	Alive	Alive or dead of other cause	Alive or dead due to cancer
83	White	White	Female	8500	Moderately differentiated; Grade II	HR+/HER2- (Luminal A)	Positive	Positive	Negative	T2	N1	M1	IV	Widowed	Insured	No	No	No	0	Dead	7	Breast	Dead (attributable to this cancer dx)	Alive or dead due to cancer
65	White	White	Female	8500	Poorly differentiated; Grade III	HR-/HER2- (Triple Negative)	Negative	Negative	Negative	T4d	N3a	M1	IV	Divorced	Insured	No	Yes	No	51	Dead	25	Breast	Dead (attributable to this cancer dx)	Alive or dead due to cancer
67	Black	Black	Male	8500	Moderately differentiated; Grade II	HR+/HER2- (Luminal A)	Positive	Positive	Negative	T4b	N1	M1	IV	Widowed	Insured	No	No	No	0	Dead	15	Breast	Dead (attributable to this cancer dx)	Alive or dead due to cancer
65	Black	Black	Female	8500	Poorly differentiated; Grade III	HR-/HER2+ (HER2 enriched)	Negative	Negative	Positive	T2	N1a	M1	IV	Married (including common law)	Insured	No	Yes	Yes	22	Dead	29	Breast	Dead (attributable to this cancer dx)	Alive or dead due to cancer
52	Black	Black	Female	8500	Poorly differentiated; Grade III	HR-/HER2- (Triple Negative)	Negative	Negative	Negative	T4b	N1a	M1	IV	Single (never married)	Any Medicaid	No	No	No	22	Alive	39	Alive	Alive or dead of other cause	Alive or dead due to cancer
65	White	White	Female	8480	Moderately differentiated; Grade II	HR+/HER2- (Luminal A)	Positive	Positive	Negative	T4b	N1	M1	IV	Married (including common law)	Insured	Yes	No	Yes	41	Dead	41	Breast	Dead (attributable to this cancer dx)	Alive or dead due to cancer
56	White	White	Female	8520	Well differentiated; Grade I	HR+/HER2- (Luminal A)	Positive	Positive	Negative	T2	N3c	M1	IV	Married (including common law)	Any Medicaid	No	Yes	No	0	Alive	38	Alive	Alive or dead of other cause	Alive or dead due to cancer
57	White	White	Female	8500	Poorly differentiated; Grade III	HR+/HER2- (Luminal A)	Positive	Negative	Negative	T2	N1	M1	IV	Married (including common law)	Insured	No	No	No	0	Dead	20	Breast	Dead (attributable to this cancer dx)	Alive or dead due to cancer
54	Black	Black	Female	8500	Poorly differentiated; Grade III	HR-/HER2- (Triple Negative)	Negative	Negative	Negative	T3	N1mi	M1	IV	Single (never married)	Insured	No	Yes	Yes	51	Dead	10	Breast	Dead (attributable to this cancer dx)	Alive or dead due to cancer
62	White	White	Female	8500	Unknown	HR-/HER2- (Triple Negative)	Negative	Negative	Negative	T4b	N1	M1	IV	Divorced	Insured	No	No	No	0	Dead	10	Breast	Dead (attributable to this cancer dx)	Alive or dead due to cancer
75	White	White	Female	8500	Poorly differentiated; Grade III	HR+/HER2- (Luminal A)	Positive	Positive	Negative	T3	N3NOS	M1	IV	Unknown	Insured	No	Yes	Yes	0	Dead	11	Breast	Dead (attributable to this cancer dx)	Alive or dead due to cancer
52	White	White	Female	8500	Poorly differentiated; Grade III	HR+/HER2- (Luminal A)	Positive	Positive	Negative	T3	N3b	M1	IV	Married (including common law)	Insured	No	No	No	56	Dead	30	Breast	Dead (attributable to this cancer dx)	Alive or dead due to cancer
66	Black	Black	Female	8500	Poorly differentiated; Grade III	HR-/HER2- (Triple Negative)	Negative	Negative	Negative	T2	N1	M1	IV	Married (including common law)	Insured	No	Yes	Yes	0	Dead	10	Breast	Dead (attributable to this cancer dx)	Alive or dead due to cancer
65	White	White	Female	8522	Moderately differentiated; Grade II	HR+/HER2- (Luminal A)	Positive	Positive	Negative	T3	N3a	M1	IV	Married (including common law)	Insured	No	No	No	51	Dead	32	Breast	Dead (attributable to this cancer dx)	Alive or dead due to cancer
37	White	White	Female	8500	Moderately differentiated; Grade II	HR+/HER2- (Luminal A)	Positive	Positive	Negative	T2	N0	M1	IV	Divorced	Insured	No	Yes	Yes	0	Dead	28	Breast	Dead (attributable to this cancer dx)	Alive or dead due to cancer
48	White	White	Female	8500	Moderately differentiated; Grade II	HR-/HER2- (Triple Negative)	Negative	Negative	Negative	T2	N1	M1	IV	Married (including common law)	Uninsured	No	Yes	No	0	Dead	6	Breast	Dead (attributable to this cancer dx)	Alive or dead due to cancer
64	Black	Black	Female	8500	Poorly differentiated; Grade III	HR+/HER2- (Luminal A)	Positive	Positive	Negative	T1b	N1mi	M1	IV	Divorced	Insured	No	No	No	40	Alive	36	Alive	Alive or dead of other cause	Alive or dead due to cancer
67	White	White	Female	8500	Poorly differentiated; Grade III	HR+/HER2+ (Luminal B)	Positive	Positive	Positive	T2	N1	M1	IV	Married (including common law)	Insured	No	Yes	No	0	Alive	38	Alive	Alive or dead of other cause	Alive or dead due to cancer
56	Black	Black	Female	8500	Poorly differentiated; Grade III	HR+/HER2- (Luminal A)	Positive	Positive	Negative	T2	N1	M1	IV	Divorced	Insured	No	No	No	0	Alive	39	Alive	Alive or dead of other cause	Alive or dead due to cancer
42	Black	Black	Female	8500	Poorly differentiated; Grade III	HR+/HER2- (Luminal A)	Positive	Negative	Negative	T2	N1	M1	IV	Married (including common law)	Any Medicaid	No	Yes	No	0	Alive	37	Alive	Alive or dead of other cause	Alive or dead due to cancer
48	Black	Black	Female	8520	Unknown	HR+/HER2- (Luminal A)	Positive	Positive	Negative	T4b	N1	M1	IV	Single (never married)	Insured	No	No	No	0	Dead	19	Breast	Dead (attributable to this cancer dx)	Alive or dead due to cancer
37	Black	Black	Female	8500	Unknown	HR+/HER2+ (Luminal B)	Positive	Positive	Positive	T4b	N0	M1	IV	Single (never married)	Insured	No	Yes	Yes	0	Dead	18	Breast	Dead (attributable to this cancer dx)	Alive or dead due to cancer
62	White	White	Female	8500	Moderately differentiated; Grade II	HR-/HER2+ (HER2 enriched)	Negative	Negative	Positive	T3	N1	M1	IV	Married (including common law)	Insured	No	Yes	Yes	0	Alive	41	Alive	Alive or dead of other cause	Alive or dead due to cancer
57	White	White	Female	8500	Moderately differentiated; Grade II	HR+/HER2- (Luminal A)	Positive	Positive	Negative	T3	N1	M1	IV	Single (never married)	Any Medicaid	No	Yes	Yes	0	Dead	3	Breast	Dead (attributable to this cancer dx)	Alive or dead due to cancer
77	White	White	Female	8500	Moderately differentiated; Grade II	HR+/HER2- (Luminal A)	Positive	Positive	Negative	T1c	N0	M1	IV	Unknown	Insured	No	Yes	Yes	22	Alive	44	Alive	Alive or dead of other cause	Alive or dead due to cancer
75	White	White	Female	8500	Moderately differentiated; Grade II	HR+/HER2- (Luminal A)	Positive	Positive	Negative	T4b	N1	M1	IV	Married (including common law)	Insured	No	Yes	Yes	0	Dead	6	Breast	Dead (attributable to this cancer dx)	Alive or dead due to cancer
75	White	White	Female	8500	Poorly differentiated; Grade III	HR+/HER2+ (Luminal B)	Positive	Positive	Positive	T4a	N1	M1	IV	Divorced	Insured	No	No	No	0	Dead	11	Breast	Dead (attributable to this cancer dx)	Alive or dead due to cancer
85	White	White	Female	8500	Poorly differentiated; Grade III	HR-/HER2- (Triple Negative)	Negative	Negative	Negative	T2	N3a	M1	IV	Married (including common law)	Insured	No	No	No	51	Alive	41	Alive	Alive or dead of other cause	Alive or dead due to cancer
68	Black	Black	Female	8500	Moderately differentiated; Grade II	HR+/HER2- (Luminal A)	Positive	Positive	Negative	T4a	N2NOS	M1	IV	Single (never married)	Insured	No	No	Yes	0	Alive	34	Alive	Alive or dead of other cause	Alive or dead due to cancer
59	Black	Black	Female	8500	Moderately differentiated; Grade II	HR+/HER2- (Luminal A)	Positive	Positive	Negative	T4a	N0	M1	IV	Single (never married)	Insured	No	No	No	22	Dead	8	Breast	Dead (attributable to this cancer dx)	Alive or dead due to cancer
62	White	White	Female	8500	Moderately differentiated; Grade II	HR+/HER2- (Luminal A)	Positive	Positive	Negative	T2	N1	M1	IV	Married (including common law)	Insurance status unknown	No	No	No	0	Alive	36	Alive	Alive or dead of other cause	Alive or dead due to cancer
60	White	White	Female	8520	Moderately differentiated; Grade II	HR+/HER2- (Luminal A)	Positive	Negative	Negative	T2	N2a	M1	IV	Unknown	Insured	No	Yes	No	51	Dead	43	Breast	Dead (attributable to this cancer dx)	Alive or dead due to cancer
60	White	White	Female	8500	Moderately differentiated; Grade II	HR+/HER2- (Luminal A)	Positive	Positive	Negative	T2	N1	M1	IV	Divorced	Insured	No	Yes	Yes	0	Dead	17	Other Cause of Death	Alive or dead of other cause	Dead (attributable to causes other than this cancer dx)
33	Other (American Indian/AK Native, Asian/Pacific Islander)	Asian or Pacific Islander	Female	8500	Unknown	HR+/HER2- (Luminal A)	Positive	Positive	Negative	T2	N1	M1	IV	Single (never married)	Insured/No specifics	No	No	No	50	Alive	35	Alive	Alive or dead of other cause	Alive or dead due to cancer
70	Black	Black	Female	8500	Unknown	HR-/HER2- (Triple Negative)	Negative	Negative	Negative	T2	N1a	M1	IV	Married (including common law)	Insured	No	No	No	51	Alive	38	Alive	Alive or dead of other cause	Alive or dead due to cancer
71	White	White	Female	8500	Moderately differentiated; Grade II	HR+/HER2- (Luminal A)	Positive	Positive	Negative	T4b	N0	M1	IV	Unknown	Insurance status unknown	Yes	No	Yes	0	Alive	40	Alive	Alive or dead of other cause	Alive or dead due to cancer
82	White	White	Female	8520	Well differentiated; Grade I	HR+/HER2- (Luminal A)	Positive	Negative	Negative	T1c	N1	M1	IV	Widowed	Insured	No	No	No	0	Dead	8	Breast	Dead (attributable to this cancer dx)	Alive or dead due to cancer
44	Black	Black	Female	8500	Poorly differentiated; Grade III	HR+/HER2- (Luminal A)	Positive	Positive	Negative	T3	N2NOS	M1	IV	Single (never married)	Any Medicaid	No	Yes	No	0	Dead	18	Breast	Dead (attributable to this cancer dx)	Alive or dead due to cancer
67	White	White	Female	8500	Moderately differentiated; Grade II	HR+/HER2- (Luminal A)	Positive	Positive	Negative	T4b	N1a	M1	IV	Married (including common law)	Insured	No	Yes	Yes	51	Alive	33	Alive	Alive or dead of other cause	Alive or dead due to cancer
67	White	White	Female	8503	Moderately differentiated; Grade II	HR+/HER2- (Luminal A)	Positive	Negative	Negative	T2	N1mi	M1	IV	Married (including common law)	Insured	No	Yes	No	22	Alive	32	Alive	Alive or dead of other cause	Alive or dead due to cancer
76	White	White	Female	8540	Unknown	HR-/HER2+ (HER2 enriched)	Negative	Negative	Positive	T4b	N1	M1	IV	Married (including common law)	Insured	No	Yes	No	0	Dead	6	Breast	Dead (attributable to this cancer dx)	Alive or dead due to cancer
35	Other (American Indian/AK Native, Asian/Pacific Islander)	Asian or Pacific Islander	Male	8500	Poorly differentiated; Grade III	HR+/HER2- (Luminal A)	Positive	Positive	Negative	T2	N3c	M1	IV	Divorced	Insured	No	No	Yes	0	Alive	32	Alive	Alive or dead of other cause	Alive or dead due to cancer
28	Black	Black	Female	8500	Poorly differentiated; Grade III	HR-/HER2- (Triple Negative)	Negative	Negative	Negative	T3	N2b	M1	IV	Single (never married)	Insured	No	No	No	22	Dead	13	Breast	Dead (attributable to this cancer dx)	Alive or dead due to cancer
56	White	White	Female	8500	Unknown	HR-/HER2+ (HER2 enriched)	Negative	Negative	Positive	T2	N1	M1	IV	Single (never married)	Any Medicaid	No	Yes	No	0	Dead	4	Breast	Dead (attributable to this cancer dx)	Alive or dead due to cancer
57	Black	Black	Female	8500	Poorly differentiated; Grade III	HR+/HER2+ (Luminal B)	Positive	Positive	Positive	T4b	N2a	M1	IV	Divorced	Any Medicaid	No	No	No	0	Dead	44	Breast	Dead (attributable to this cancer dx)	Alive or dead due to cancer
50	White	White	Female	8500	Moderately differentiated; Grade II	HR+/HER2+ (Luminal B)	Positive	Positive	Positive	T3	N0	M1	IV	Single (never married)	Insured/No specifics	No	No	No	42	Dead	41	Breast	Dead (attributable to this cancer dx)	Alive or dead due to cancer
76	White	White	Female	8500	Moderately differentiated; Grade II	HR+/HER2- (Luminal A)	Positive	Positive	Negative	T4b	N1	M1	IV	Widowed	Insured	No	No	No	0	Dead	13	Breast	Dead (attributable to this cancer dx)	Alive or dead due to cancer
72	White	White	Female	8500	Moderately differentiated; Grade II	HR+/HER2- (Luminal A)	Positive	Negative	Negative	T3	N1	M1	IV	Widowed	Insured	No	Yes	Yes	0	Dead	13	Breast	Dead (attributable to this cancer dx)	Alive or dead due to cancer
56	Black	Black	Female	8500	Moderately differentiated; Grade II	HR+/HER2- (Luminal A)	Positive	Positive	Negative	T4d	N1mi	M1	IV	Single (never married)	Insured	No	Yes	No	51	Dead	26	Breast	Dead (attributable to this cancer dx)	Alive or dead due to cancer
80	White	White	Female	8500	Poorly differentiated; Grade III	HR+/HER2+ (Luminal B)	Positive	Positive	Positive	T4b	N1	M1	IV	Widowed	Insured	No	Yes	Yes	0	Dead	31	Breast	Dead (attributable to this cancer dx)	Alive or dead due to cancer
55	Black	Black	Female	8500	Poorly differentiated; Grade III	HR-/HER2+ (HER2 enriched)	Negative	Negative	Positive	T4b	N3c	M1	IV	Single (never married)	Any Medicaid	No	Yes	Yes	0	Dead	2	Breast	Dead (attributable to this cancer dx)	Alive or dead due to cancer
66	White	White	Female	8500	Poorly differentiated; Grade III	HR+/HER2- (Luminal A)	Positive	Positive	Negative	T2	N1	M1	IV	Widowed	Insured	No	No	No	0	Dead	28	Breast	Dead (attributable to this cancer dx)	Alive or dead due to cancer
40	White	White	Female	8500	Well differentiated; Grade I	HR+/HER2- (Luminal A)	Positive	Positive	Negative	T2	N0	M1	IV	Single (never married)	Insured	Yes	Yes	Yes	0	Dead	19	Breast	Dead (attributable to this cancer dx)	Alive or dead due to cancer
52	White	White	Female	8500	Poorly differentiated; Grade III	HR+/HER2- (Luminal A)	Positive	Positive	Negative	T3	N1	M1	IV	Widowed	Insured	No	Yes	No	0	Alive	32	Alive	Alive or dead of other cause	Alive or dead due to cancer
86	White	White	Female	8500	Poorly differentiated; Grade III	HR+/HER2- (Luminal A)	Positive	Positive	Negative	T2	N1	M1	IV	Unknown	Insured	No	No	No	0	Dead	31	Breast	Dead (attributable to this cancer dx)	Alive or dead due to cancer
59	Black	Black	Female	8522	Unknown	HR+/HER2- (Luminal A)	Positive	Positive	Negative	T4b	N2a	M1	IV	Married (including common law)	Insured	No	No	No	51	Alive	44	Alive	Alive or dead of other cause	Alive or dead due to cancer
71	Black	Black	Female	8500	Moderately differentiated; Grade II	HR+/HER2+ (Luminal B)	Positive	Positive	Positive	T3	N1	M1	IV	Unknown	Insured	Yes	No	No	0	Dead	2	Breast	Dead (attributable to this cancer dx)	Alive or dead due to cancer
43	White	White	Female	8500	Moderately differentiated; Grade II	HR+/HER2- (Luminal A)	Positive	Positive	Negative	T4b	N1	M1	IV	Divorced	Insured	No	No	No	0	Dead	21	Breast	Dead (attributable to this cancer dx)	Alive or dead due to cancer
45	White	White	Female	8500	Well differentiated; Grade I	HR+/HER2- (Luminal A)	Positive	Positive	Negative	T2	N0	M1	IV	Married (including common law)	Insured	No	No	No	0	Alive	33	Alive	Alive or dead of other cause	Alive or dead due to cancer
51	White	White	Female	8500	Well differentiated; Grade I	HR+/HER2- (Luminal A)	Positive	Positive	Negative	T2	N1NOS	M1	IV	Single (never married)	Insured	No	Yes	No	0	Dead	26	Breast	Dead (attributable to this cancer dx)	Alive or dead due to cancer
78	Black	Black	Female	8500	Unknown	HR+/HER2- (Luminal A)	Positive	Positive	Negative	T3	N1a	M1	IV	Widowed	Insured	No	No	Yes	0	Alive	32	Alive	Alive or dead of other cause	Alive or dead due to cancer
58	Black	Black	Female	8500	Unknown	HR+/HER2- (Luminal A)	Positive	Positive	Negative	T2	N0	M1	IV	Single (never married)	Any Medicaid	No	No	No	0	Dead	30	Breast	Dead (attributable to this cancer dx)	Alive or dead due to cancer
63	White	White	Female	8500	Moderately differentiated; Grade II	HR+/HER2- (Luminal A)	Positive	Negative	Negative	T2	N1	M1	IV	Unknown	Any Medicaid	No	No	Yes	0	Alive	32	Alive	Alive or dead of other cause	Alive or dead due to cancer
53	White	White	Female	8500	Moderately differentiated; Grade II	HR+/HER2- (Luminal A)	Positive	Positive	Negative	T2	N2a	M1	IV	Divorced	Any Medicaid	No	No	No	0	Dead	19	Breast	Dead (attributable to this cancer dx)	Alive or dead due to cancer
69	White	White	Female	8500	Moderately differentiated; Grade II	HR+/HER2- (Luminal A)	Positive	Positive	Negative	T3	N1	M1	IV	Married (including common law)	Insured	No	Yes	No	0	Dead	1	Breast	Dead (attributable to this cancer dx)	Alive or dead due to cancer
86	Black	Black	Female	8500	Moderately differentiated; Grade II	HR+/HER2- (Luminal A)	Positive	Positive	Negative	T4a	N1	M1	IV	Married (including common law)	Insured	No	No	Yes	0	Dead	29	Breast	Dead (attributable to this cancer dx)	Alive or dead due to cancer
64	Black	Black	Female	8520	Unknown	HR+/HER2+ (Luminal B)	Negative	Positive	Positive	T4b	N1	M1	IV	Married (including common law)	Insured	No	No	No	51	Dead	11	Breast	Dead (attributable to this cancer dx)	Alive or dead due to cancer
82	White	White	Female	8500	Moderately differentiated; Grade II	HR+/HER2- (Luminal A)	Positive	Positive	Negative	T2	N1	M1	IV	Widowed	Insured/No specifics	No	No	No	0	Dead	28	Diseases of Heart	Alive or dead of other cause	Dead (attributable to causes other than this cancer dx)
92	Black	Black	Female	8500	Unknown	HR-/HER2+ (HER2 enriched)	Negative	Negative	Positive	T2	N1	M1	IV	Widowed	Insured	No	Yes	No	0	Dead	9	Breast	Dead (attributable to this cancer dx)	Alive or dead due to cancer
41	Black	Black	Female	8500	Poorly differentiated; Grade III	HR-/HER2+ (HER2 enriched)	Negative	Negative	Positive	T4b	N0	M1	IV	Single (never married)	Any Medicaid	No	No	Yes	41	Alive	38	Alive	Alive or dead of other cause	Alive or dead due to cancer
41	White	White	Female	8500	Moderately differentiated; Grade II	HR+/HER2- (Luminal A)	Positive	Positive	Negative	T3	N1	M1	IV	Married (including common law)	Insured	No	No	No	0	Alive	31	Alive	Alive or dead of other cause	Alive or dead due to cancer
70	White	White	Female	8500	Poorly differentiated; Grade III	HR-/HER2- (Triple Negative)	Negative	Negative	Negative	T4b	N3a	M1	IV	Widowed	Insured	No	Yes	No	52	Dead	6	Breast	Dead (attributable to this cancer dx)	Alive or dead due to cancer
52	White	White	Female	8500	Poorly differentiated; Grade III	HR+/HER2- (Luminal A)	Positive	Positive	Negative	T2	N0	M1	IV	Single (never married)	Insured	No	No	No	49	Alive	34	Alive	Alive or dead of other cause	Alive or dead due to cancer
48	White	White	Female	8520	Unknown	HR+/HER2- (Luminal A)	Positive	Positive	Negative	T1c	N0	M1	IV	Married (including common law)	Insured	No	No	No	22	Alive	30	Alive	Alive or dead of other cause	Alive or dead due to cancer
70	Black	Black	Female	8520	Unknown	HR+/HER2- (Luminal A)	Positive	Positive	Negative	T2	N1	M1	IV	Unknown	Insured	No	No	No	0	Dead	9	Breast	Dead (attributable to this cancer dx)	Alive or dead due to cancer
55	Black	Black	Female	8500	Moderately differentiated; Grade II	HR+/HER2- (Luminal A)	Positive	Negative	Negative	T1c	N1	M1	IV	Divorced	Insured	No	No	Yes	0	Alive	29	Alive	Alive or dead of other cause	Alive or dead due to cancer
70	White	White	Female	8523	Moderately differentiated; Grade II	HR-/HER2- (Triple Negative)	Negative	Negative	Negative	T4c	N2a	M1	IV	Widowed	Insured/No specifics	Yes	Yes	No	0	Dead	1	Breast	Dead (attributable to this cancer dx)	Alive or dead due to cancer
79	White	White	Female	8500	Moderately differentiated; Grade II	HR+/HER2- (Luminal A)	Positive	Positive	Negative	T2	N1	M1	IV	Unknown	Insured	No	No	Yes	0	Dead	32	Breast	Dead (attributable to this cancer dx)	Alive or dead due to cancer
58	Black	Black	Female	8500	Poorly differentiated; Grade III	HR+/HER2+ (Luminal B)	Positive	Positive	Positive	T4b	N1	M1	IV	Separated	Insured	No	Yes	No	0	Dead	11	Breast	Dead (attributable to this cancer dx)	Alive or dead due to cancer
60	Black	Black	Female	8500	Poorly differentiated; Grade III	HR+/HER2- (Luminal A)	Positive	Negative	Negative	T4b	N1a	M1	IV	Single (never married)	Insured	No	No	No	51	Alive	34	Alive	Alive or dead of other cause	Alive or dead due to cancer
83	Black	Black	Female	8480	Moderately differentiated; Grade II	HR+/HER2- (Luminal A)	Positive	Positive	Negative	T1c	N0	M1	IV	Married (including common law)	Insured	No	Yes	No	0	Dead	1	Breast	Dead (attributable to this cancer dx)	Alive or dead due to cancer
59	White	White	Female	8500	Well differentiated; Grade I	HR+/HER2- (Luminal A)	Positive	Positive	Negative	T2	N1	M1	IV	Unknown	Insured/No specifics	No	No	No	0	Alive	33	Alive	Alive or dead of other cause	Alive or dead due to cancer
72	White	White	Female	8500	Moderately differentiated; Grade II	HR+/HER2- (Luminal A)	Positive	Positive	Negative	T2	N3b	M1	IV	Divorced	Insured	No	Yes	Yes	0	Alive	28	Alive	Alive or dead of other cause	Alive or dead due to cancer
73	White	White	Female	8140	Unknown	HR+/HER2- (Luminal A)	Positive	Positive	Negative	T4b	N0	M1	IV	Widowed	Insured	No	No	No	0	Alive	26	Alive	Alive or dead of other cause	Alive or dead due to cancer
59	White	White	Female	8500	Poorly differentiated; Grade III	HR+/HER2- (Luminal A)	Positive	Positive	Negative	T2	N0	M1	IV	Married (including common law)	Any Medicaid	No	No	No	22	Alive	30	Alive	Alive or dead of other cause	Alive or dead due to cancer
49	White	White	Female	8500	Poorly differentiated; Grade III	HR+/HER2+ (Luminal B)	Positive	Positive	Positive	T4b	N1NOS	M1	IV	Married (including common law)	Any Medicaid	No	Yes	No	0	Alive	28	Alive	Alive or dead of other cause	Alive or dead due to cancer
51	Other (American Indian/AK Native, Asian/Pacific Islander)	Asian or Pacific Islander	Female	8500	Poorly differentiated; Grade III	HR-/HER2+ (HER2 enriched)	Negative	Negative	Positive	T4b	N0	M1	IV	Widowed	Insured	Yes	Yes	No	0	Alive	31	Alive	Alive or dead of other cause	Alive or dead due to cancer
50	White	White	Female	8500	Moderately differentiated; Grade II	HR+/HER2- (Luminal A)	Positive	Positive	Negative	T3	N0	M1	IV	Married (including common law)	Any Medicaid	No	Yes	Yes	0	Dead	16	Breast	Dead (attributable to this cancer dx)	Alive or dead due to cancer
58	Black	Black	Female	8500	Moderately differentiated; Grade II	HR+/HER2- (Luminal A)	Positive	Positive	Negative	T4c	N3b	M1	IV	Married (including common law)	Insured	No	No	No	0	Dead	24	Breast	Dead (attributable to this cancer dx)	Alive or dead due to cancer
90	White	White	Female	8010	Poorly differentiated; Grade III	HR+/HER2+ (Luminal B)	Positive	Positive	Positive	T1c	N0	M1	IV	Widowed	Insured	No	No	No	0	Dead	5	Breast	Dead (attributable to this cancer dx)	Alive or dead due to cancer
48	Black	Black	Female	8500	Poorly differentiated; Grade III	HR+/HER2- (Luminal A)	Positive	Positive	Negative	T2	N1	M1	IV	Single (never married)	Insured	No	No	No	0	Dead	16	Breast	Dead (attributable to this cancer dx)	Alive or dead due to cancer
63	Black	Black	Female	8500	Unknown	HR+/HER2- (Luminal A)	Positive	Positive	Negative	T4b	N1	M1	IV	Single (never married)	Insured/No specifics	No	No	Yes	0	Alive	24	Alive	Alive or dead of other cause	Alive or dead due to cancer
58	White	White	Female	8500	Well differentiated; Grade I	HR+/HER2- (Luminal A)	Positive	Positive	Negative	T4b	N0	M1	IV	Widowed	Any Medicaid	No	No	No	0	Dead	23	Breast	Dead (attributable to this cancer dx)	Alive or dead due to cancer
67	White	White	Female	8520	Well differentiated; Grade I	HR+/HER2- (Luminal A)	Positive	Positive	Negative	T4d	N1	M1	IV	Widowed	Insured/No specifics	Yes	No	No	0	Dead	5	Breast	Dead (attributable to this cancer dx)	Alive or dead due to cancer
85	White	White	Female	8500	Moderately differentiated; Grade II	HR+/HER2- (Luminal A)	Positive	Positive	Negative	T4d	N2a	M1	IV	Widowed	Insured	No	No	No	0	Dead	19	Breast	Dead (attributable to this cancer dx)	Alive or dead due to cancer
68	White	White	Female	8524	Poorly differentiated; Grade III	HR+/HER2+ (Luminal B)	Positive	Negative	Positive	T4d	N1	M1	IV	Widowed	Insured	No	Yes	No	0	Dead	5	Breast	Dead (attributable to this cancer dx)	Alive or dead due to cancer
91	White	White	Female	8500	Poorly differentiated; Grade III	HR+/HER2+ (Luminal B)	Positive	Negative	Positive	T4b	N0(i-)	M1	IV	Single (never married)	Insured	No	No	Yes	51	Alive	26	Alive	Alive or dead of other cause	Alive or dead due to cancer
76	White	White	Female	8500	Poorly differentiated; Grade III	HR-/HER2- (Triple Negative)	Negative	Negative	Negative	T4c	N3NOS	M1	IV	Single (never married)	Insured/No specifics	Yes	No	Yes	0	Dead	10	Breast	Dead (attributable to this cancer dx)	Alive or dead due to cancer
53	White	White	Female	8500	Moderately differentiated; Grade II	HR+/HER2- (Luminal A)	Positive	Positive	Negative	T2	N1	M1	IV	Married (including common law)	Insured	No	Yes	No	22	Dead	22	Breast	Dead (attributable to this cancer dx)	Alive or dead due to cancer
75	White	White	Female	8520	Moderately differentiated; Grade II	HR+/HER2- (Luminal A)	Positive	Positive	Negative	T1c	N1	M1	IV	Widowed	Insured	No	No	No	0	Alive	23	Alive	Alive or dead of other cause	Alive or dead due to cancer
74	Black	Black	Female	8520	Poorly differentiated; Grade III	HR-/HER2- (Triple Negative)	Negative	Negative	Negative	T4b	N3b	M1	IV	Widowed	Insured/No specifics	No	Yes	Yes	0	Dead	10	Breast	Dead (attributable to this cancer dx)	Alive or dead due to cancer
78	White	White	Female	8520	Unknown	HR+/HER2- (Luminal A)	Positive	Negative	Negative	T4b	N1	M1	IV	Widowed	Insured	No	Yes	No	0	Alive	22	Alive	Alive or dead of other cause	Alive or dead due to cancer
62	Black	Black	Female	8140	Unknown	HR-/HER2- (Triple Negative)	Negative	Negative	Negative	T2	N0	M1	IV	Single (never married)	Insured/No specifics	No	No	No	0	Alive	24	Alive	Alive or dead of other cause	Alive or dead due to cancer
63	Black	Black	Female	8500	Poorly differentiated; Grade III	HR+/HER2- (Luminal A)	Negative	Positive	Negative	T1c	N2a	M1	IV	Separated	Insured	Yes	No	No	0	Dead	10	Breast	Dead (attributable to this cancer dx)	Alive or dead due to cancer
54	White	White	Female	8500	Moderately differentiated; Grade II	HR+/HER2- (Luminal A)	Positive	Positive	Negative	T2	N1	M1	IV	Married (including common law)	Insured	No	No	No	0	Dead	16	Breast	Dead (attributable to this cancer dx)	Alive or dead due to cancer
60	White	White	Female	8500	Moderately differentiated; Grade II	HR-/HER2+ (HER2 enriched)	Negative	Negative	Positive	T2	N1	M1	IV	Married (including common law)	Insured	No	No	No	0	Dead	20	Breast	Dead (attributable to this cancer dx)	Alive or dead due to cancer
54	Black	Black	Female	8503	Moderately differentiated; Grade II	HR+/HER2- (Luminal A)	Positive	Positive	Negative	T1c	N1	M1	IV	Single (never married)	Insured	No	No	No	22	Alive	20	Alive	Alive or dead of other cause	Alive or dead due to cancer
69	Black	Black	Female	8010	Unknown	HR+/HER2- (Luminal A)	Positive	Positive	Negative	T2	N1	M1	IV	Widowed	Insured	No	No	No	0	Alive	20	Alive	Alive or dead of other cause	Alive or dead due to cancer
37	White	White	Female	8500	Poorly differentiated; Grade III	HR+/HER2- (Luminal A)	Positive	Positive	Negative	T2	N3a	M1	IV	Divorced	Insured	No	No	No	52	Alive	22	Alive	Alive or dead of other cause	Alive or dead due to cancer
55	White	White	Female	8500	Poorly differentiated; Grade III	HR-/HER2+ (HER2 enriched)	Negative	Negative	Positive	T4d	N1	M1	IV	Single (never married)	Insured/No specifics	No	No	No	0	Alive	39	Alive	Alive or dead of other cause	Alive or dead due to cancer
62	Black	Black	Female	8500	Poorly differentiated; Grade III	HR+/HER2+ (Luminal B)	Positive	Negative	Positive	T4b	N1	M1	IV	Unknown	Uninsured	No	Yes	Yes	0	Dead	5	Breast	Dead (attributable to this cancer dx)	Alive or dead due to cancer
45	White	White	Female	8500	Poorly differentiated; Grade III	HR-/HER2- (Triple Negative)	Negative	Negative	Negative	T4NOS	N3c	M1	IV	Single (never married)	Insured/No specifics	No	Yes	No	0	Dead	2	Breast	Dead (attributable to this cancer dx)	Alive or dead due to cancer
64	White	White	Female	8500	Poorly differentiated; Grade III	HR+/HER2- (Luminal A)	Positive	Positive	Negative	T4d	N1	M1	IV	Widowed	Insured	No	Yes	Yes	0	Dead	6	Breast	Dead (attributable to this cancer dx)	Alive or dead due to cancer
87	White	White	Female	8500	Poorly differentiated; Grade III	HR+/HER2+ (Luminal B)	Positive	Positive	Positive	T4b	N0	M1	IV	Widowed	Insured	No	No	No	0	Dead	1	Breast	Dead (attributable to this cancer dx)	Alive or dead due to cancer
61	White	White	Female	8500	Poorly differentiated; Grade III	HR-/HER2- (Triple Negative)	Negative	Negative	Negative	T4b	N2a	M1	IV	Widowed	Insured	No	No	No	51	Dead	17	Breast	Dead (attributable to this cancer dx)	Alive or dead due to cancer
62	Black	Black	Female	8500	Poorly differentiated; Grade III	HR+/HER2+ (Luminal B)	Positive	Positive	Positive	T3	N2a	M1	IV	Married (including common law)	Insured	No	No	No	51	Alive	20	Alive	Alive or dead of other cause	Alive or dead due to cancer
59	White	White	Female	8500	Poorly differentiated; Grade III	HR+/HER2+ (Luminal B)	Positive	Positive	Positive	T4d	N1	M1	IV	Single (never married)	Insured/No specifics	No	No	Yes	0	Alive	20	Alive	Alive or dead of other cause	Alive or dead due to cancer
46	White	White	Female	8500	Poorly differentiated; Grade III	HR-/HER2+ (HER2 enriched)	Negative	Negative	Positive	T3	N1	M1	IV	Married (including common law)	Insured	No	Yes	No	0	Alive	17	Alive	Alive or dead of other cause	Alive or dead due to cancer
54	White	White	Female	8500	Moderately differentiated; Grade II	HR-/HER2- (Triple Negative)	Negative	Negative	Negative	T4d	N3c	M1	IV	Married (including common law)	Any Medicaid	No	No	No	0	Dead	11	Breast	Dead (attributable to this cancer dx)	Alive or dead due to cancer
64	White	White	Female	8522	Well differentiated; Grade I	HR+/HER2- (Luminal A)	Positive	Positive	Negative	T1c	N0	M1	IV	Married (including common law)	Insured	No	No	No	0	Alive	29	Alive	Alive or dead of other cause	Alive or dead due to cancer
83	White	White	Female	8500	Well differentiated; Grade I	HR+/HER2- (Luminal A)	Positive	Positive	Negative	T2	N0	M1	IV	Married (including common law)	Insured	No	No	No	22	Alive	19	Alive	Alive or dead of other cause	Alive or dead due to cancer
55	White	White	Female	8500	Moderately differentiated; Grade II	HR+/HER2- (Luminal A)	Positive	Positive	Negative	T2	N1	M1	IV	Single (never married)	Insured	Yes	No	Yes	0	Dead	1	Breast	Dead (attributable to this cancer dx)	Alive or dead due to cancer
38	White	White	Female	8500	Unknown	HR+/HER2- (Luminal A)	Positive	Positive	Negative	T2	N2a	M1	IV	Married (including common law)	Insurance status unknown	No	Yes	No	0	Dead	10	Breast	Dead (attributable to this cancer dx)	Alive or dead due to cancer
31	White	White	Female	8500	Poorly differentiated; Grade III	HR+/HER2+ (Luminal B)	Positive	Positive	Positive	T4d	N1	M1	IV	Single (never married)	Insured	No	No	No	0	Alive	19	Alive	Alive or dead of other cause	Alive or dead due to cancer
47	White	White	Female	8500	Moderately differentiated; Grade II	HR+/HER2- (Luminal A)	Positive	Positive	Negative	T2	N1	M1	IV	Married (including common law)	Insured	No	No	No	0	Alive	25	Alive	Alive or dead of other cause	Alive or dead due to cancer
54	White	White	Female	8500	Poorly differentiated; Grade III	HR+/HER2- (Luminal A)	Positive	Positive	Negative	T4b	N1	M1	IV	Married (including common law)	Insured	No	Yes	No	41	Dead	9	Breast	Dead (attributable to this cancer dx)	Alive or dead due to cancer
69	White	White	Female	8520	Well differentiated; Grade I	HR+/HER2- (Luminal A)	Positive	Positive	Negative	T2	N0	M1	IV	Single (never married)	Insured	No	No	No	0	Dead	4	Cerebrovascular Diseases	Alive or dead of other cause	Dead (attributable to causes other than this cancer dx)
56	White	White	Female	8520	Well differentiated; Grade I	HR+/HER2- (Luminal A)	Positive	Positive	Negative	T1c	N3a	M1	IV	Widowed	Any Medicaid	No	No	No	0	Alive	27	Alive	Alive or dead of other cause	Alive or dead due to cancer
45	White	White	Female	8140	Poorly differentiated; Grade III	HR-/HER2- (Triple Negative)	Negative	Negative	Negative	T2	N1	M1	IV	Unknown	Insured	No	No	Yes	0	Dead	3	Breast	Dead (attributable to this cancer dx)	Alive or dead due to cancer
60	White	White	Female	8500	Moderately differentiated; Grade II	HR-/HER2- (Triple Negative)	Negative	Negative	Negative	T2	N0	M1	IV	Married (including common law)	Insured	No	Yes	No	0	Alive	17	Alive	Alive or dead of other cause	Alive or dead due to cancer
59	Black	Black	Female	8500	Poorly differentiated; Grade III	HR-/HER2+ (HER2 enriched)	Negative	Negative	Positive	T3	N1a	M1	IV	Married (including common law)	Insured	No	No	No	22	Alive	17	Alive	Alive or dead of other cause	Alive or dead due to cancer
59	Black	Black	Female	8500	Poorly differentiated; Grade III	HR-/HER2- (Triple Negative)	Negative	Negative	Negative	T2	N1	M1	IV	Single (never married)	Insured	No	No	No	0	Dead	7	Breast	Dead (attributable to this cancer dx)	Alive or dead due to cancer
84	White	White	Female	8500	Moderately differentiated; Grade II	HR+/HER2- (Luminal A)	Positive	Negative	Negative	T4d	N0	M1	IV	Married (including common law)	Insured	No	No	No	0	Dead	13	Breast	Dead (attributable to this cancer dx)	Alive or dead due to cancer
71	Black	Black	Female	8500	Moderately differentiated; Grade II	HR+/HER2- (Luminal A)	Positive	Positive	Negative	T4b	N1	M1	IV	Unknown	Insured	No	No	No	0	Alive	25	Alive	Alive or dead of other cause	Alive or dead due to cancer
46	Other (American Indian/AK Native, Asian/Pacific Islander)	Asian or Pacific Islander	Female	8500	Poorly differentiated; Grade III	HR+/HER2+ (Luminal B)	Positive	Positive	Positive	T4d	N2a	M1	IV	Single (never married)	Insured	No	No	Yes	0	Alive	15	Alive	Alive or dead of other cause	Alive or dead due to cancer
65	White	White	Female	8500	Moderately differentiated; Grade II	HR+/HER2- (Luminal A)	Positive	Positive	Negative	T2	N1	M1	IV	Single (never married)	Insured	No	No	No	0	Dead	4	Breast	Dead (attributable to this cancer dx)	Alive or dead due to cancer
51	White	White	Female	8500	Poorly differentiated; Grade III	HR+/HER2+ (Luminal B)	Positive	Positive	Positive	T1c	N1	M1	IV	Married (including common law)	Insured	No	No	No	0	Alive	14	Alive	Alive or dead of other cause	Alive or dead due to cancer
66	White	White	Female	8500	Poorly differentiated; Grade III	HR-/HER2- (Triple Negative)	Negative	Negative	Negative	T3	N3b	M1	IV	Divorced	Insured	No	Yes	Yes	0	Dead	12	Breast	Dead (attributable to this cancer dx)	Alive or dead due to cancer
74	White	White	Female	8500	Poorly differentiated; Grade III	HR-/HER2- (Triple Negative)	Negative	Negative	Negative	T3	N1	M1	IV	Widowed	Insured	No	Yes	Yes	0	Alive	15	Alive	Alive or dead of other cause	Alive or dead due to cancer
79	White	White	Male	8500	Moderately differentiated; Grade II	HR+/HER2- (Luminal A)	Positive	Positive	Negative	T4a	N1	M1	IV	Married (including common law)	Insured	No	No	No	0	Alive	19	Alive	Alive or dead of other cause	Alive or dead due to cancer
66	White	White	Female	8500	Moderately differentiated; Grade II	HR+/HER2- (Luminal A)	Positive	Positive	Negative	T2	N0	M1	IV	Unknown	Insured	No	No	No	0	Alive	22	Alive	Alive or dead of other cause	Alive or dead due to cancer
52	Black	Black	Female	8500	Well differentiated; Grade I	HR+/HER2- (Luminal A)	Positive	Positive	Negative	T4b	N1	M1	IV	Single (never married)	Insured	No	No	No	0	Alive	16	Alive	Alive or dead of other cause	Alive or dead due to cancer
49	Black	Black	Female	8500	Moderately differentiated; Grade II	HR+/HER2- (Luminal A)	Positive	Positive	Negative	T2	N0	M1	IV	Single (never married)	Insured	No	No	No	0	Alive	19	Alive	Alive or dead of other cause	Alive or dead due to cancer
72	White	White	Female	8500	Well differentiated; Grade I	HR+/HER2- (Luminal A)	Positive	Positive	Negative	T1c	N1	M1	IV	Divorced	Insured	No	No	No	0	Alive	22	Alive	Alive or dead of other cause	Alive or dead due to cancer
55	White	White	Female	8500	Poorly differentiated; Grade III	HR-/HER2- (Triple Negative)	Negative	Negative	Negative	T2	N2b	M1	IV	Single (never married)	Insured	No	No	No	0	Dead	8	Breast	Dead (attributable to this cancer dx)	Alive or dead due to cancer
35	Other (American Indian/AK Native, Asian/Pacific Islander)	Asian or Pacific Islander	Female	8500	Poorly differentiated; Grade III	HR+/HER2- (Luminal A)	Positive	Positive	Negative	T1c	N1	M1	IV	Married (including common law)	Insured	No	No	No	0	Alive	14	Alive	Alive or dead of other cause	Alive or dead due to cancer
65	Black	Black	Female	8520	Unknown	HR+/HER2- (Luminal A)	Positive	Positive	Negative	T4b	N1	M1	IV	Divorced	Insured	No	No	No	59	Alive	15	Alive	Alive or dead of other cause	Alive or dead due to cancer
75	White	White	Female	8520	Well differentiated; Grade I	HR+/HER2- (Luminal A)	Positive	Positive	Negative	T2	N1	M1	IV	Widowed	Insured	No	No	No	0	Dead	14	Breast	Dead (attributable to this cancer dx)	Alive or dead due to cancer
54	White	White	Female	8520	Moderately differentiated; Grade II	HR+/HER2- (Luminal A)	Positive	Positive	Negative	T1c	N0	M1	IV	Married (including common law)	Insured	No	No	No	0	Alive	17	Alive	Alive or dead of other cause	Alive or dead due to cancer
70	White	White	Female	8500	Poorly differentiated; Grade III	HR+/HER2+ (Luminal B)	Positive	Negative	Positive	T2	N0	M1	IV	Married (including common law)	Any Medicaid	No	No	Yes	0	Alive	18	Alive	Alive or dead of other cause	Alive or dead due to cancer
52	Black	Black	Female	8500	Moderately differentiated; Grade II	HR+/HER2- (Luminal A)	Positive	Positive	Negative	T4d	N1	M1	IV	Married (including common law)	Insured	No	Yes	No	0	Alive	14	Alive	Alive or dead of other cause	Alive or dead due to cancer
83	White	White	Female	8520	Moderately differentiated; Grade II	HR+/HER2- (Luminal A)	Positive	Positive	Negative	T2	N1a	M1	IV	Widowed	Insured	No	No	No	23	Alive	15	Alive	Alive or dead of other cause	Alive or dead due to cancer
72	Black	Black	Female	8500	Poorly differentiated; Grade III	HR+/HER2+ (Luminal B)	Positive	Negative	Positive	T2	N1a	M1	IV	Married (including common law)	Insured	No	No	No	42	Alive	16	Alive	Alive or dead of other cause	Alive or dead due to cancer
68	White	White	Female	8522	Moderately differentiated; Grade II	HR+/HER2- (Luminal A)	Positive	Negative	Negative	T1c	N2a	M1	IV	Married (including common law)	Insured	No	No	No	22	Alive	13	Alive	Alive or dead of other cause	Alive or dead due to cancer
79	White	White	Male	8500	Moderately differentiated; Grade II	HR+/HER2- (Luminal A)	Positive	Positive	Negative	T2	N0	M1	IV	Married (including common law)	Insured	No	No	No	0	Alive	13	Alive	Alive or dead of other cause	Alive or dead due to cancer
52	White	White	Female	8500	Poorly differentiated; Grade III	HR+/HER2- (Luminal A)	Positive	Positive	Negative	T2	N1	M1	IV	Married (including common law)	Insured	Yes	No	No	0	Alive	18	Alive	Alive or dead of other cause	Alive or dead due to cancer
75	Black	Black	Female	8500	Moderately differentiated; Grade II	HR+/HER2- (Luminal A)	Positive	Positive	Negative	T3	N1	M1	IV	Unknown	Insured	No	No	No	0	Dead	8	Breast	Dead (attributable to this cancer dx)	Alive or dead due to cancer
86	White	White	Female	8523	Moderately differentiated; Grade II	HR+/HER2- (Luminal A)	Positive	Positive	Negative	T2	N3a	M1	IV	Widowed	Insured	No	No	No	22	Alive	15	Alive	Alive or dead of other cause	Alive or dead due to cancer
70	White	White	Female	8500	Poorly differentiated; Grade III	HR+/HER2- (Luminal A)	Positive	Positive	Negative	T4b	N3b	M1	IV	Single (never married)	Insured	No	No	Yes	0	Alive	14	Alive	Alive or dead of other cause	Alive or dead due to cancer
61	Black	Black	Female	8500	Poorly differentiated; Grade III	HR-/HER2- (Triple Negative)	Negative	Negative	Negative	T2	N0	M1	IV	Divorced	Insured	No	Yes	No	0	Alive	17	Alive	Alive or dead of other cause	Alive or dead due to cancer
48	Black	Black	Female	8522	Unknown	HR+/HER2+ (Luminal B)	Positive	Positive	Positive	T3	N1	M1	IV	Divorced	Insured	No	No	No	0	Alive	17	Alive	Alive or dead of other cause	Alive or dead due to cancer
72	White	White	Female	8520	Moderately differentiated; Grade II	HR+/HER2- (Luminal A)	Positive	Positive	Negative	T3	N2a	M1	IV	Married (including common law)	Insured	No	No	No	51	Alive	14	Alive	Alive or dead of other cause	Alive or dead due to cancer
76	White	White	Female	8520	Well differentiated; Grade I	HR+/HER2- (Luminal A)	Positive	Positive	Negative	T1c	N0	M1	IV	Married (including common law)	Insured	No	No	No	0	Alive	17	Alive	Alive or dead of other cause	Alive or dead due to cancer
53	White	White	Female	8520	Well differentiated; Grade I	HR+/HER2- (Luminal A)	Positive	Positive	Negative	T3	N1	M1	IV	Married (including common law)	Insured	No	No	No	0	Alive	15	Alive	Alive or dead of other cause	Alive or dead due to cancer
51	Black	Black	Female	8500	Poorly differentiated; Grade III	HR-/HER2+ (HER2 enriched)	Negative	Negative	Positive	T4c	N0	M1	IV	Married (including common law)	Any Medicaid	No	Yes	No	0	Dead	8	Breast	Dead (attributable to this cancer dx)	Alive or dead due to cancer
68	White	White	Female	8507	Poorly differentiated; Grade III	HR-/HER2+ (HER2 enriched)	Negative	Negative	Positive	T2	N0	M1	IV	Widowed	Insured	No	No	No	0	Alive	16	Alive	Alive or dead of other cause	Alive or dead due to cancer
33	Other (American Indian/AK Native, Asian/Pacific Islander)	American Indian/Alaska Native	Female	8500	Moderately differentiated; Grade II	HR+/HER2- (Luminal A)	Positive	Positive	Negative	T4d	N2a	M1	IV	Married (including common law)	Insured/No specifics	No	No	No	51	Alive	18	Alive	Alive or dead of other cause	Alive or dead due to cancer
55	Black	Black	Female	8530	Moderately differentiated; Grade II	HR-/HER2+ (HER2 enriched)	Negative	Negative	Positive	T4d	N1	M1	IV	Unknown	Insurance status unknown	Yes	No	Yes	0	Dead	18	Breast	Dead (attributable to this cancer dx)	Alive or dead due to cancer
51	White	White	Female	8500	Poorly differentiated; Grade III	HR+/HER2- (Luminal A)	Positive	Positive	Negative	T2	N0	M1	IV	Married (including common law)	Insured	No	No	No	0	Alive	23	Alive	Alive or dead of other cause	Alive or dead due to cancer
74	White	White	Female	8520	Unknown	HR+/HER2+ (Luminal B)	Positive	Negative	Positive	T1c	N0	M1	IV	Married (including common law)	Insured/No specifics	No	No	No	0	Dead	3	Breast	Dead (attributable to this cancer dx)	Alive or dead due to cancer
80	White	White	Female	8500	Poorly differentiated; Grade III	HR+/HER2- (Luminal A)	Positive	Positive	Negative	T2	N2a	M1	IV	Divorced	Insured	No	Yes	No	51	Dead	8	Breast	Dead (attributable to this cancer dx)	Alive or dead due to cancer
70	White	White	Female	8500	Poorly differentiated; Grade III	HR+/HER2+ (Luminal B)	Positive	Positive	Positive	T2	N1a	M1	IV	Married (including common law)	Insured	No	No	No	51	Alive	17	Alive	Alive or dead of other cause	Alive or dead due to cancer
40	White	White	Female	8140	Unknown	HR+/HER2+ (Luminal B)	Positive	Positive	Positive	T2	N1	M1	IV	Married (including common law)	Insured	No	Yes	No	0	Dead	29	Breast	Dead (attributable to this cancer dx)	Alive or dead due to cancer
48	White	White	Female	8520	Moderately differentiated; Grade II	HR+/HER2+ (Luminal B)	Positive	Positive	Positive	T2	N3a	M1	IV	Married (including common law)	Insured	No	No	No	52	Alive	17	Alive	Alive or dead of other cause	Alive or dead due to cancer
71	White	White	Female	8500	Poorly differentiated; Grade III	HR+/HER2+ (Luminal B)	Positive	Positive	Positive	T3	N1	M1	IV	Married (including common law)	Insured	No	No	No	0	Alive	12	Alive	Alive or dead of other cause	Alive or dead due to cancer
75	Black	Black	Female	8500	Moderately differentiated; Grade II	HR+/HER2+ (Luminal B)	Positive	Positive	Positive	T4b	N3c	M1	IV	Married (including common law)	Insured	Yes	No	Yes	0	Dead	3	Breast	Dead (attributable to this cancer dx)	Alive or dead due to cancer
56	White	White	Female	8500	Poorly differentiated; Grade III	HR+/HER2+ (Luminal B)	Positive	Positive	Positive	T4b	N3c	M1	IV	Married (including common law)	Any Medicaid	Yes	Yes	Yes	0	Alive	16	Alive	Alive or dead of other cause	Alive or dead due to cancer
59	White	White	Female	8500	Poorly differentiated; Grade III	HR-/HER2+ (HER2 enriched)	Negative	Negative	Positive	T4d	N0(i+)	M1	IV	Married (including common law)	Insured	No	No	No	52	Alive	17	Alive	Alive or dead of other cause	Alive or dead due to cancer
68	White	White	Female	8500	Unknown	HR+/HER2- (Luminal A)	Positive	Negative	Negative	T2	N0	M1	IV	Single (never married)	Insured	Yes	Yes	No	0	Alive	12	Alive	Alive or dead of other cause	Alive or dead due to cancer
70	White	White	Female	8500	Poorly differentiated; Grade III	HR-/HER2+ (HER2 enriched)	Negative	Negative	Positive	T3	N1	M1	IV	Married (including common law)	Insured	No	Yes	Yes	0	Dead	1	Breast	Dead (attributable to this cancer dx)	Alive or dead due to cancer
76	White	White	Male	8520	Moderately differentiated; Grade II	HR+/HER2- (Luminal A)	Positive	Negative	Negative	T2	N0	M1	IV	Married (including common law)	Insured/No specifics	No	No	No	0	Alive	13	Alive	Alive or dead of other cause	Alive or dead due to cancer
64	White	White	Female	8500	Moderately differentiated; Grade II	HR+/HER2+ (Luminal B)	Positive	Negative	Positive	T1b	N0	M1	IV	Widowed	Any Medicaid	No	No	No	0	Alive	14	Alive	Alive or dead of other cause	Alive or dead due to cancer
58	Black	Black	Female	8500	Poorly differentiated; Grade III	HR-/HER2- (Triple Negative)	Negative	Negative	Negative	T4d	N1	M1	IV	Married (including common law)	Insured	No	No	No	0	Dead	4	Breast	Dead (attributable to this cancer dx)	Alive or dead due to cancer
58	Black	Black	Female	8500	Moderately differentiated; Grade II	HR+/HER2- (Luminal A)	Positive	Positive	Negative	T2	N0	M1	IV	Single (never married)	Any Medicaid	No	No	No	22	Dead	15	Breast	Dead (attributable to this cancer dx)	Alive or dead due to cancer
58	White	White	Female	8500	Moderately differentiated; Grade II	HR+/HER2+ (Luminal B)	Positive	Positive	Positive	T2	N1	M1	IV	Single (never married)	Any Medicaid	No	No	No	0	Alive	22	Alive	Alive or dead of other cause	Alive or dead due to cancer
54	White	White	Female	8500	Moderately differentiated; Grade II	HR+/HER2+ (Luminal B)	Positive	Positive	Positive	T1c	N0	M1	IV	Married (including common law)	Insured	No	No	No	0	Alive	14	Alive	Alive or dead of other cause	Alive or dead due to cancer
69	White	White	Female	8000	Unknown	HR+/HER2- (Luminal A)	Positive	Positive	Negative	T2	N0	M1	IV	Divorced	Insured	No	No	No	0	Dead	24	Breast	Dead (attributable to this cancer dx)	Alive or dead due to cancer
69	White	White	Female	8500	Moderately differentiated; Grade II	HR+/HER2- (Luminal A)	Positive	Positive	Negative	T2	N1a	M1	IV	Married (including common law)	Insured	No	No	No	23	Alive	28	Alive	Alive or dead of other cause	Alive or dead due to cancer
77	White	White	Female	8500	Unknown	HR+/HER2- (Luminal A)	Positive	Positive	Negative	T2	N1	M1	IV	Single (never married)	Insured	No	No	Yes	0	Dead	3	Breast	Dead (attributable to this cancer dx)	Alive or dead due to cancer
65	White	White	Female	8500	Poorly differentiated; Grade III	HR+/HER2- (Luminal A)	Positive	Positive	Negative	T2	N2a	M1	IV	Married (including common law)	Insured	No	No	No	0	Dead	1	Breast	Dead (attributable to this cancer dx)	Alive or dead due to cancer
44	Other (American Indian/AK Native, Asian/Pacific Islander)	Asian or Pacific Islander	Female	8500	Poorly differentiated; Grade III	HR-/HER2- (Triple Negative)	Negative	Negative	Negative	T2	N3c	M1	IV	Single (never married)	Any Medicaid	No	No	No	0	Dead	29	Breast	Dead (attributable to this cancer dx)	Alive or dead due to cancer
63	Other (American Indian/AK Native, Asian/Pacific Islander)	Asian or Pacific Islander	Female	8010	Unknown	HR+/HER2- (Luminal A)	Positive	Positive	Negative	T3	N1	M1	IV	Widowed	Any Medicaid	No	No	No	0	Alive	83	Alive	Alive or dead of other cause	Alive or dead due to cancer
78	Other (American Indian/AK Native, Asian/Pacific Islander)	Asian or Pacific Islander	Female	8500	Moderately differentiated; Grade II	HR+/HER2- (Luminal A)	Positive	Positive	Negative	T4b	N1	M1	IV	Single (never married)	Insured/No specifics	No	No	No	0	Dead	2	Breast	Dead (attributable to this cancer dx)	Alive or dead due to cancer
61	Other (American Indian/AK Native, Asian/Pacific Islander)	Asian or Pacific Islander	Female	8500	Poorly differentiated; Grade III	HR+/HER2- (Luminal A)	Positive	Negative	Negative	T3	N2a	M1	IV	Single (never married)	Insured	No	Yes	No	41	Dead	11	Breast	Dead (attributable to this cancer dx)	Alive or dead due to cancer
60	Other (American Indian/AK Native, Asian/Pacific Islander)	Asian or Pacific Islander	Female	8500	Unknown	HR+/HER2- (Luminal A)	Positive	Positive	Negative	T4a	N3c	M1	IV	Divorced	Insured/No specifics	No	Yes	No	0	Dead	5	Breast	Dead (attributable to this cancer dx)	Alive or dead due to cancer
49	Other (American Indian/AK Native, Asian/Pacific Islander)	Asian or Pacific Islander	Female	8500	Poorly differentiated; Grade III	HR+/HER2- (Luminal A)	Positive	Positive	Negative	T3	N1	M1	IV	Married (including common law)	Any Medicaid	No	No	No	0	Dead	33	Breast	Dead (attributable to this cancer dx)	Alive or dead due to cancer
49	Other (American Indian/AK Native, Asian/Pacific Islander)	Asian or Pacific Islander	Female	8500	Unknown	HR+/HER2+ (Luminal B)	Positive	Positive	Positive	T4c	N3b	M1	IV	Single (never married)	Insured	No	No	No	0	Dead	18	Breast	Dead (attributable to this cancer dx)	Alive or dead due to cancer
64	Other (American Indian/AK Native, Asian/Pacific Islander)	Asian or Pacific Islander	Female	8500	Moderately differentiated; Grade II	HR+/HER2- (Luminal A)	Positive	Positive	Negative	T4a	N0	M1	IV	Married (including common law)	Any Medicaid	No	No	No	0	Dead	43	Breast	Dead (attributable to this cancer dx)	Alive or dead due to cancer
62	White	White	Female	8500	Poorly differentiated; Grade III	HR+/HER2+ (Luminal B)	Positive	Positive	Positive	T4b	N1	M1	IV	Married (including common law)	Insured/No specifics	Yes	No	No	0	Dead	36	Breast	Dead (attributable to this cancer dx)	Alive or dead due to cancer
44	Other (American Indian/AK Native, Asian/Pacific Islander)	Asian or Pacific Islander	Female	8500	Unknown	HR+/HER2- (Luminal A)	Positive	Positive	Negative	T1c	N1	M1	IV	Single (never married)	Any Medicaid	No	No	Yes	0	Alive	73	Alive	Alive or dead of other cause	Alive or dead due to cancer
63	White	White	Female	8500	Poorly differentiated; Grade III	HR+/HER2- (Luminal A)	Positive	Positive	Negative	T4b	N2NOS	M1	IV	Married (including common law)	Insured	No	No	No	0	Dead	17	Diseases of Heart	Alive or dead of other cause	Dead (attributable to causes other than this cancer dx)
49	Other (American Indian/AK Native, Asian/Pacific Islander)	Asian or Pacific Islander	Female	8500	Poorly differentiated; Grade III	HR+/HER2- (Luminal A)	Positive	Positive	Negative	T4a	N1	M1	IV	Married (including common law)	Insured	No	Yes	No	0	Dead	22	Breast	Dead (attributable to this cancer dx)	Alive or dead due to cancer
78	Other (American Indian/AK Native, Asian/Pacific Islander)	Asian or Pacific Islander	Female	8500	Moderately differentiated; Grade II	HR+/HER2- (Luminal A)	Positive	Positive	Negative	T2	N0	M1	IV	Divorced	Insured/No specifics	Yes	No	No	0	Dead	1	Breast	Dead (attributable to this cancer dx)	Alive or dead due to cancer
29	Other (American Indian/AK Native, Asian/Pacific Islander)	Asian or Pacific Islander	Female	8010	Unknown	HR+/HER2- (Luminal A)	Positive	Positive	Negative	T2	N0	M1	IV	Divorced	Insured/No specifics	No	No	No	99	Dead	51	Breast	Dead (attributable to this cancer dx)	Alive or dead due to cancer
54	Other (American Indian/AK Native, Asian/Pacific Islander)	Asian or Pacific Islander	Female	8503	Unknown	HR+/HER2- (Luminal A)	Positive	Positive	Negative	T3	N2b	M1	IV	Married (including common law)	Insured	Yes	No	No	0	Dead	29	Breast	Dead (attributable to this cancer dx)	Alive or dead due to cancer
43	Black	Black	Female	8500	Poorly differentiated; Grade III	HR-/HER2- (Triple Negative)	Negative	Negative	Negative	T3	N2NOS	M1	IV	Single (never married)	Insured	No	Yes	No	0	Dead	12	Breast	Dead (attributable to this cancer dx)	Alive or dead due to cancer
30	Other (American Indian/AK Native, Asian/Pacific Islander)	American Indian/Alaska Native	Female	8530	Poorly differentiated; Grade III	HR+/HER2+ (Luminal B)	Positive	Positive	Positive	T4d	N1	M1	IV	Married (including common law)	Insured	No	Yes	Yes	51	Alive	78	Alive	Alive or dead of other cause	Alive or dead due to cancer
59	Other (American Indian/AK Native, Asian/Pacific Islander)	Asian or Pacific Islander	Female	8500	Poorly differentiated; Grade III	HR-/HER2- (Triple Negative)	Negative	Negative	Negative	T2	N1	M1	IV	Married (including common law)	Insured	Yes	Yes	Yes	22	Alive	29	Alive	Alive or dead of other cause	Alive or dead due to cancer
67	Other (American Indian/AK Native, Asian/Pacific Islander)	Asian or Pacific Islander	Female	8500	Poorly differentiated; Grade III	HR+/HER2+ (Luminal B)	Positive	Positive	Positive	T3	N3c	M1	IV	Married (including common law)	Uninsured	No	No	No	0	Dead	26	Breast	Dead (attributable to this cancer dx)	Alive or dead due to cancer
68	Other (American Indian/AK Native, Asian/Pacific Islander)	Asian or Pacific Islander	Female	8500	Undifferentiated; anaplastic; Grade IV	HR-/HER2- (Triple Negative)	Negative	Negative	Negative	T2	N1	M1	IV	Divorced	Insurance status unknown	No	Yes	No	0	Dead	4	Breast	Dead (attributable to this cancer dx)	Alive or dead due to cancer
63	Other (American Indian/AK Native, Asian/Pacific Islander)	Asian or Pacific Islander	Female	8520	Moderately differentiated; Grade II	HR+/HER2- (Luminal A)	Positive	Positive	Negative	T1c	N2a	M1	IV	Married (including common law)	Insured	No	No	No	0	Dead	23	Breast	Dead (attributable to this cancer dx)	Alive or dead due to cancer
52	Other (American Indian/AK Native, Asian/Pacific Islander)	Asian or Pacific Islander	Female	8520	Moderately differentiated; Grade II	HR+/HER2+ (Luminal B)	Positive	Positive	Positive	T2	N1	M1	IV	Single (never married)	Insured/No specifics	No	No	No	0	Dead	49	Breast	Dead (attributable to this cancer dx)	Alive or dead due to cancer
62	Other (American Indian/AK Native, Asian/Pacific Islander)	Asian or Pacific Islander	Female	8520	Moderately differentiated; Grade II	HR+/HER2- (Luminal A)	Positive	Positive	Negative	T2	N2a	M1	IV	Married (including common law)	Insured	No	No	No	51	Dead	23	Breast	Dead (attributable to this cancer dx)	Alive or dead due to cancer
73	Other (American Indian/AK Native, Asian/Pacific Islander)	Asian or Pacific Islander	Male	8500	Poorly differentiated; Grade III	HR+/HER2- (Luminal A)	Positive	Positive	Negative	T3	N3b	M1	IV	Married (including common law)	Insured	No	No	No	41	Dead	22	Breast	Dead (attributable to this cancer dx)	Alive or dead due to cancer
59	Other (American Indian/AK Native, Asian/Pacific Islander)	Asian or Pacific Islander	Female	8520	Unknown	HR+/HER2- (Luminal A)	Positive	Positive	Negative	T4b	N1	M1	IV	Widowed	Uninsured	No	No	No	0	Dead	11	Breast	Dead (attributable to this cancer dx)	Alive or dead due to cancer
34	Other (American Indian/AK Native, Asian/Pacific Islander)	Asian or Pacific Islander	Female	8500	Moderately differentiated; Grade II	HR+/HER2- (Luminal A)	Positive	Positive	Negative	T1c	N1a	M1	IV	Married (including common law)	Insured	No	No	No	55	Alive	71	Alive	Alive or dead of other cause	Alive or dead due to cancer
45	Other (American Indian/AK Native, Asian/Pacific Islander)	Asian or Pacific Islander	Female	8500	Moderately differentiated; Grade II	HR+/HER2- (Luminal A)	Positive	Positive	Negative	T4b	N0	M1	IV	Married (including common law)	Insured	No	No	No	0	Alive	63	Alive	Alive or dead of other cause	Alive or dead due to cancer
72	White	White	Female	8500	Well differentiated; Grade I	HR+/HER2- (Luminal A)	Positive	Positive	Negative	T2	N1	M1	IV	Divorced	Any Medicaid	No	No	No	0	Dead	49	Breast	Dead (attributable to this cancer dx)	Alive or dead due to cancer
81	Other (American Indian/AK Native, Asian/Pacific Islander)	Asian or Pacific Islander	Female	8140	Unknown	HR-/HER2- (Triple Negative)	Negative	Negative	Negative	T4b	N3c	M1	IV	Widowed	Insured	No	No	No	0	Dead	36	Breast	Dead (attributable to this cancer dx)	Alive or dead due to cancer
63	White	White	Male	8500	Moderately differentiated; Grade II	HR+/HER2- (Luminal A)	Positive	Positive	Negative	T2	N0	M1	IV	Married (including common law)	Insured/No specifics	No	No	Yes	41	Dead	57	Chronic Liver Disease and Cirrhosis	Alive or dead of other cause	Dead (attributable to causes other than this cancer dx)
40	Other (American Indian/AK Native, Asian/Pacific Islander)	Asian or Pacific Islander	Female	8500	Moderately differentiated; Grade II	HR+/HER2- (Luminal A)	Positive	Positive	Negative	T2	N1	M1	IV	Married (including common law)	Any Medicaid	No	No	No	0	Dead	42	Breast	Dead (attributable to this cancer dx)	Alive or dead due to cancer
29	Other (American Indian/AK Native, Asian/Pacific Islander)	Asian or Pacific Islander	Female	8500	Poorly differentiated; Grade III	HR+/HER2+ (Luminal B)	Positive	Negative	Positive	T4d	N1	M1	IV	Single (never married)	Any Medicaid	No	Yes	Yes	99	Dead	27	Breast	Dead (attributable to this cancer dx)	Alive or dead due to cancer
62	Other (American Indian/AK Native, Asian/Pacific Islander)	Asian or Pacific Islander	Female	8500	Moderately differentiated; Grade II	HR+/HER2+ (Luminal B)	Positive	Positive	Positive	T4b	N2NOS	M1	IV	Single (never married)	Insured	Yes	Yes	Yes	0	Dead	2	Breast	Dead (attributable to this cancer dx)	Alive or dead due to cancer
56	Other (American Indian/AK Native, Asian/Pacific Islander)	Asian or Pacific Islander	Female	8500	Moderately differentiated; Grade II	HR+/HER2+ (Luminal B)	Positive	Negative	Positive	T4a	N0	M1	IV	Married (including common law)	Insured	Yes	No	Yes	0	Dead	1	Breast	Dead (attributable to this cancer dx)	Alive or dead due to cancer
79	White	White	Female	8500	Moderately differentiated; Grade II	HR+/HER2- (Luminal A)	Positive	Negative	Negative	T2	N3a	M1	IV	Unknown	Insured	No	No	No	51	Dead	46	Breast	Dead (attributable to this cancer dx)	Alive or dead due to cancer
74	Other (American Indian/AK Native, Asian/Pacific Islander)	Asian or Pacific Islander	Female	8500	Unknown	HR+/HER2- (Luminal A)	Positive	Positive	Negative	T4b	N1	M1	IV	Married (including common law)	Insured	No	No	No	0	Alive	49	Alive	Alive or dead of other cause	Alive or dead due to cancer
84	Other (American Indian/AK Native, Asian/Pacific Islander)	Asian or Pacific Islander	Female	8500	Poorly differentiated; Grade III	HR+/HER2- (Luminal A)	Positive	Positive	Negative	T4a	N1	M1	IV	Divorced	Insured	No	No	No	0	Alive	45	Alive	Alive or dead of other cause	Alive or dead due to cancer
80	White	White	Female	8520	Moderately differentiated; Grade II	HR+/HER2- (Luminal A)	Positive	Negative	Negative	T4b	N3a	M1	IV	Divorced	Insured/No specifics	No	No	No	53	Dead	7	Breast	Dead (attributable to this cancer dx)	Alive or dead due to cancer
53	White	White	Female	8520	Moderately differentiated; Grade II	HR+/HER2- (Luminal A)	Positive	Positive	Negative	T2	N2b	M1	IV	Married (including common law)	Insured	No	No	No	22	Dead	20	Breast	Dead (attributable to this cancer dx)	Alive or dead due to cancer
42	Other (American Indian/AK Native, Asian/Pacific Islander)	Asian or Pacific Islander	Female	8500	Moderately differentiated; Grade II	HR+/HER2- (Luminal A)	Positive	Positive	Negative	T2	N0(i-)	M1	IV	Divorced	Insured	No	No	No	22	Alive	50	Alive	Alive or dead of other cause	Alive or dead due to cancer
88	Other (American Indian/AK Native, Asian/Pacific Islander)	Asian or Pacific Islander	Female	8500	Moderately differentiated; Grade II	HR+/HER2- (Luminal A)	Positive	Positive	Negative	T2	N1	M1	IV	Widowed	Insured/No specifics	No	No	Yes	0	Dead	27	Breast	Dead (attributable to this cancer dx)	Alive or dead due to cancer
64	Other (American Indian/AK Native, Asian/Pacific Islander)	Asian or Pacific Islander	Female	8500	Poorly differentiated; Grade III	HR-/HER2+ (HER2 enriched)	Negative	Negative	Positive	T4b	N2a	M1	IV	Divorced	Insured/No specifics	No	No	No	65	Alive	53	Alive	Alive or dead of other cause	Alive or dead due to cancer
50	Other (American Indian/AK Native, Asian/Pacific Islander)	Asian or Pacific Islander	Female	8500	Poorly differentiated; Grade III	HR+/HER2- (Luminal A)	Positive	Positive	Negative	T2	N0	M1	IV	Single (never married)	Insured	No	No	Yes	0	Alive	5	Alive	Alive or dead of other cause	Alive or dead due to cancer
45	Other (American Indian/AK Native, Asian/Pacific Islander)	Asian or Pacific Islander	Female	8500	Moderately differentiated; Grade II	HR+/HER2- (Luminal A)	Positive	Positive	Negative	T2	N1mi	M1	IV	Single (never married)	Insured	No	No	No	41	Alive	50	Alive	Alive or dead of other cause	Alive or dead due to cancer
64	Other (American Indian/AK Native, Asian/Pacific Islander)	Asian or Pacific Islander	Female	8500	Moderately differentiated; Grade II	HR+/HER2- (Luminal A)	Positive	Positive	Negative	T1b	N0(i-)	M1	IV	Married (including common law)	Insured/No specifics	No	No	No	22	Alive	48	Alive	Alive or dead of other cause	Alive or dead due to cancer
65	Other (American Indian/AK Native, Asian/Pacific Islander)	Asian or Pacific Islander	Female	8500	Unknown	HR+/HER2- (Luminal A)	Positive	Positive	Negative	T3	N1	M1	IV	Married (including common law)	Insured/No specifics	No	No	No	0	Alive	42	Alive	Alive or dead of other cause	Alive or dead due to cancer
57	Other (American Indian/AK Native, Asian/Pacific Islander)	Asian or Pacific Islander	Female	8500	Moderately differentiated; Grade II	HR+/HER2- (Luminal A)	Positive	Positive	Negative	T3	N1	M1	IV	Divorced	Insured	No	No	No	99	Alive	53	Alive	Alive or dead of other cause	Alive or dead due to cancer
49	Other (American Indian/AK Native, Asian/Pacific Islander)	Asian or Pacific Islander	Female	8500	Unknown	HR+/HER2- (Luminal A)	Positive	Positive	Negative	T2	N1	M1	IV	Divorced	Insured	No	No	No	0	Alive	58	Alive	Alive or dead of other cause	Alive or dead due to cancer
46	White	White	Female	8500	Unknown	HR+/HER2- (Luminal A)	Positive	Positive	Negative	T1c	N0	M1	IV	Single (never married)	Insured	No	No	No	0	Alive	43	Alive	Alive or dead of other cause	Alive or dead due to cancer
58	White	White	Female	8500	Unknown	HR+/HER2+ (Luminal B)	Positive	Positive	Positive	T4b	N3a	M1	IV	Divorced	Insured	No	No	Yes	0	Dead	23	Breast	Dead (attributable to this cancer dx)	Alive or dead due to cancer
55	White	White	Female	8500	Moderately differentiated; Grade II	HR+/HER2- (Luminal A)	Positive	Negative	Negative	T3	N1mi	M1	IV	Married (including common law)	Insured	No	No	No	48	Alive	50	Alive	Alive or dead of other cause	Alive or dead due to cancer
65	Other (American Indian/AK Native, Asian/Pacific Islander)	Asian or Pacific Islander	Female	8520	Poorly differentiated; Grade III	HR+/HER2- (Luminal A)	Positive	Positive	Negative	T3	N3a	M1	IV	Single (never married)	Insured	No	No	No	51	Alive	49	Alive	Alive or dead of other cause	Alive or dead due to cancer
68	Other (American Indian/AK Native, Asian/Pacific Islander)	Asian or Pacific Islander	Female	8500	Well differentiated; Grade I	HR+/HER2- (Luminal A)	Positive	Positive	Negative	T4b	N0	M1	IV	Widowed	Insured	No	No	Yes	0	Dead	38	Breast	Dead (attributable to this cancer dx)	Alive or dead due to cancer
66	White	White	Female	8010	Unknown	HR+/HER2- (Luminal A)	Positive	Positive	Negative	T4b	N1	M1	IV	Single (never married)	Insured	No	Yes	Yes	0	Dead	27	Breast	Dead (attributable to this cancer dx)	Alive or dead due to cancer
53	Other (American Indian/AK Native, Asian/Pacific Islander)	Asian or Pacific Islander	Female	8500	Well differentiated; Grade I	HR+/HER2- (Luminal A)	Positive	Positive	Negative	T3	N0	M1	IV	Married (including common law)	Insured	No	Yes	No	99	Alive	34	Alive	Alive or dead of other cause	Alive or dead due to cancer
60	Black	Black	Female	8500	Unknown	HR+/HER2- (Luminal A)	Positive	Positive	Negative	T4b	N3b	M1	IV	Single (never married)	Insured	No	Yes	Yes	0	Dead	28	Breast	Dead (attributable to this cancer dx)	Alive or dead due to cancer
86	White	White	Female	8520	Well differentiated; Grade I	HR+/HER2+ (Luminal B)	Positive	Negative	Positive	T3	N2a	M1	IV	Divorced	Insured	No	No	No	50	Alive	42	Alive	Alive or dead of other cause	Alive or dead due to cancer
44	Other (American Indian/AK Native, Asian/Pacific Islander)	Asian or Pacific Islander	Female	8522	Unknown	HR+/HER2- (Luminal A)	Positive	Positive	Negative	T2	N1	M1	IV	Married (including common law)	Insured	No	Yes	Yes	99	Dead	40	Breast	Dead (attributable to this cancer dx)	Alive or dead due to cancer
63	Other (American Indian/AK Native, Asian/Pacific Islander)	Asian or Pacific Islander	Female	8500	Well differentiated; Grade I	HR+/HER2- (Luminal A)	Positive	Positive	Negative	T2	N0	M1	IV	Married (including common law)	Insured	No	Yes	No	0	Alive	36	Alive	Alive or dead of other cause	Alive or dead due to cancer
59	Black	Black	Female	8500	Poorly differentiated; Grade III	HR-/HER2- (Triple Negative)	Negative	Negative	Negative	T4d	N3c	M1	IV	Single (never married)	Any Medicaid	No	Yes	No	99	Dead	9	Breast	Dead (attributable to this cancer dx)	Alive or dead due to cancer
54	White	White	Female	8500	Poorly differentiated; Grade III	HR-/HER2- (Triple Negative)	Negative	Negative	Negative	T3	N2a	M1	IV	Divorced	Insured/No specifics	No	No	No	51	Alive	38	Alive	Alive or dead of other cause	Alive or dead due to cancer
52	Other (American Indian/AK Native, Asian/Pacific Islander)	Asian or Pacific Islander	Female	8500	Undifferentiated; anaplastic; Grade IV	HR+/HER2- (Luminal A)	Positive	Positive	Negative	T2	N3a	M1	IV	Single (never married)	Any Medicaid	No	No	No	51	Alive	42	Alive	Alive or dead of other cause	Alive or dead due to cancer
53	Other (American Indian/AK Native, Asian/Pacific Islander)	Asian or Pacific Islander	Female	8500	Poorly differentiated; Grade III	HR+/HER2+ (Luminal B)	Positive	Positive	Positive	T4b	N2NOS	M1	IV	Single (never married)	Insured	Yes	No	Yes	0	Alive	23	Alive	Alive or dead of other cause	Alive or dead due to cancer
56	White	White	Female	8520	Moderately differentiated; Grade II	HR-/HER2- (Triple Negative)	Negative	Negative	Negative	T2	N0	M1	IV	Separated	Insured	No	No	No	0	Dead	13	Breast	Dead (attributable to this cancer dx)	Alive or dead due to cancer
68	Other (American Indian/AK Native, Asian/Pacific Islander)	Asian or Pacific Islander	Female	8500	Poorly differentiated; Grade III	HR-/HER2- (Triple Negative)	Negative	Negative	Negative	T4b	N1	M1	IV	Married (including common law)	Insured	No	No	Yes	41	Dead	2	Breast	Dead (attributable to this cancer dx)	Alive or dead due to cancer
77	Other (American Indian/AK Native, Asian/Pacific Islander)	Asian or Pacific Islander	Female	8500	Moderately differentiated; Grade II	HR+/HER2- (Luminal A)	Positive	Positive	Negative	T4a	N1	M1	IV	Married (including common law)	Insured	No	No	Yes	99	Alive	47	Alive	Alive or dead of other cause	Alive or dead due to cancer
59	White	White	Female	8500	Poorly differentiated; Grade III	HR+/HER2+ (Luminal B)	Positive	Positive	Positive	T3	N3a	M1	IV	Divorced	Any Medicaid	No	No	Yes	99	Dead	5	Diseases of Heart	Alive or dead of other cause	Dead (attributable to causes other than this cancer dx)
60	Other (American Indian/AK Native, Asian/Pacific Islander)	Asian or Pacific Islander	Female	8500	Moderately differentiated; Grade II	HR-/HER2+ (HER2 enriched)	Negative	Negative	Positive	T4d	N2a	M1	IV	Married (including common law)	Insured	No	No	No	51	Alive	29	Alive	Alive or dead of other cause	Alive or dead due to cancer
64	White	White	Female	8500	Poorly differentiated; Grade III	HR+/HER2+ (Luminal B)	Positive	Positive	Positive	T2	N1a	M1	IV	Widowed	Insured/No specifics	No	No	No	52	Alive	44	Alive	Alive or dead of other cause	Alive or dead due to cancer
62	White	White	Female	8520	Moderately differentiated; Grade II	HR+/HER2- (Luminal A)	Positive	Positive	Negative	T4a	N1	M1	IV	Married (including common law)	Insurance status unknown	No	Yes	Yes	0	Dead	23	Other Cause of Death	Alive or dead of other cause	Dead (attributable to causes other than this cancer dx)
65	Other (American Indian/AK Native, Asian/Pacific Islander)	Asian or Pacific Islander	Female	8500	Moderately differentiated; Grade II	HR+/HER2- (Luminal A)	Positive	Negative	Negative	T2	N0	M1	IV	Married (including common law)	Insured	No	No	No	22	Alive	29	Alive	Alive or dead of other cause	Alive or dead due to cancer
55	White	White	Female	8500	Unknown	HR+/HER2- (Luminal A)	Positive	Positive	Negative	T4b	N2a	M1	IV	Single (never married)	Insured	No	Yes	No	0	Dead	7	Breast	Dead (attributable to this cancer dx)	Alive or dead due to cancer
94	Other (American Indian/AK Native, Asian/Pacific Islander)	Asian or Pacific Islander	Female	8500	Unknown	HR-/HER2- (Triple Negative)	Negative	Negative	Negative	T4b	N3c	M1	IV	Unknown	Insured	No	No	Yes	0	Dead	18	Breast	Dead (attributable to this cancer dx)	Alive or dead due to cancer
59	Other (American Indian/AK Native, Asian/Pacific Islander)	Asian or Pacific Islander	Female	8523	Poorly differentiated; Grade III	HR-/HER2+ (HER2 enriched)	Negative	Negative	Positive	T3	N3a	M1	IV	Separated	Any Medicaid	No	Yes	No	51	Dead	27	Breast	Dead (attributable to this cancer dx)	Alive or dead due to cancer
69	White	White	Female	8480	Moderately differentiated; Grade II	HR+/HER2- (Luminal A)	Positive	Negative	Negative	T3	N0	M1	IV	Single (never married)	Any Medicaid	No	No	Yes	0	Dead	19	Breast	Dead (attributable to this cancer dx)	Alive or dead due to cancer
55	Other (American Indian/AK Native, Asian/Pacific Islander)	Asian or Pacific Islander	Female	8520	Well differentiated; Grade I	HR+/HER2- (Luminal A)	Positive	Positive	Negative	T1c	N2a	M1	IV	Divorced	Insured	No	No	No	22	Alive	21	Alive	Alive or dead of other cause	Alive or dead due to cancer
45	White	White	Female	8500	Moderately differentiated; Grade II	HR+/HER2+ (Luminal B)	Positive	Positive	Positive	T2	N1	M1	IV	Single (never married)	Insured	No	No	No	52	Alive	23	Alive	Alive or dead of other cause	Alive or dead due to cancer
55	Other (American Indian/AK Native, Asian/Pacific Islander)	Asian or Pacific Islander	Female	8500	Poorly differentiated; Grade III	HR+/HER2+ (Luminal B)	Positive	Positive	Positive	T4b	N3a	M1	IV	Single (never married)	Insured	No	Yes	No	51	Alive	20	Alive	Alive or dead of other cause	Alive or dead due to cancer
49	Other (American Indian/AK Native, Asian/Pacific Islander)	Asian or Pacific Islander	Female	8500	Unknown	HR+/HER2- (Luminal A)	Positive	Positive	Negative	T2	N1	M1	IV	Single (never married)	Insured	No	Yes	Yes	0	Dead	28	Breast	Dead (attributable to this cancer dx)	Alive or dead due to cancer
56	Other (American Indian/AK Native, Asian/Pacific Islander)	Asian or Pacific Islander	Female	8500	Unknown	HR+/HER2+ (Luminal B)	Positive	Positive	Positive	T2	N1	M1	IV	Single (never married)	Insured	No	Yes	No	0	Alive	32	Alive	Alive or dead of other cause	Alive or dead due to cancer
56	Other (American Indian/AK Native, Asian/Pacific Islander)	Asian or Pacific Islander	Female	8500	Unknown	HR+/HER2- (Luminal A)	Positive	Positive	Negative	T4d	N1	M1	IV	Married (including common law)	Insured	No	Yes	No	0	Dead	24	Septicemia	Alive or dead of other cause	Dead (attributable to causes other than this cancer dx)
66	Other (American Indian/AK Native, Asian/Pacific Islander)	Asian or Pacific Islander	Female	8140	Unknown	HR+/HER2+ (Luminal B)	Positive	Positive	Positive	T2	N0	M1	IV	Widowed	Insured/No specifics	No	No	No	0	Dead	21	Breast	Dead (attributable to this cancer dx)	Alive or dead due to cancer
61	Other (American Indian/AK Native, Asian/Pacific Islander)	Asian or Pacific Islander	Female	8500	Unknown	HR-/HER2+ (HER2 enriched)	Negative	Negative	Positive	T4d	N0	M1	IV	Married (including common law)	Insured	Yes	Yes	Yes	0	Dead	16	Breast	Dead (attributable to this cancer dx)	Alive or dead due to cancer
60	White	White	Female	8500	Poorly differentiated; Grade III	HR+/HER2- (Luminal A)	Positive	Positive	Negative	T2	N3a	M1	IV	Single (never married)	Any Medicaid	No	No	No	22	Alive	33	Alive	Alive or dead of other cause	Alive or dead due to cancer
72	Other (American Indian/AK Native, Asian/Pacific Islander)	Asian or Pacific Islander	Female	8520	Unknown	HR+/HER2- (Luminal A)	Positive	Positive	Negative	T4b	N1	M1	IV	Widowed	Any Medicaid	No	No	No	0	Dead	14	Lung and Bronchus	Alive or dead of other cause	Dead (attributable to causes other than this cancer dx)
65	Other (American Indian/AK Native, Asian/Pacific Islander)	Asian or Pacific Islander	Female	8500	Moderately differentiated; Grade II	HR+/HER2- (Luminal A)	Positive	Positive	Negative	T2	N0	M1	IV	Married (including common law)	Insured/No specifics	No	No	No	0	Alive	26	Alive	Alive or dead of other cause	Alive or dead due to cancer
82	White	White	Female	8520	Poorly differentiated; Grade III	HR+/HER2- (Luminal A)	Positive	Negative	Negative	T4b	N2a	M1	IV	Widowed	Any Medicaid	No	No	No	41	Dead	17	Breast	Dead (attributable to this cancer dx)	Alive or dead due to cancer
64	Other (American Indian/AK Native, Asian/Pacific Islander)	Asian or Pacific Islander	Female	8500	Moderately differentiated; Grade II	HR+/HER2- (Luminal A)	Positive	Positive	Negative	T3	N1	M1	IV	Married (including common law)	Insured	No	No	No	0	Dead	17	Diseases of Heart	Alive or dead of other cause	Dead (attributable to causes other than this cancer dx)
73	White	White	Female	8520	Moderately differentiated; Grade II	HR+/HER2+ (Luminal B)	Positive	Negative	Positive	T3	N1	M1	IV	Single (never married)	Uninsured	No	No	No	0	Dead	3	Breast	Dead (attributable to this cancer dx)	Alive or dead due to cancer
66	Other (American Indian/AK Native, Asian/Pacific Islander)	Asian or Pacific Islander	Female	8500	Well differentiated; Grade I	HR+/HER2- (Luminal A)	Positive	Positive	Negative	T4a	N1	M1	IV	Married (including common law)	Insured	No	No	Yes	0	Alive	17	Alive	Alive or dead of other cause	Alive or dead due to cancer
53	White	White	Female	8500	Well differentiated; Grade I	HR+/HER2+ (Luminal B)	Positive	Positive	Positive	T4b	N3a	M1	IV	Married (including common law)	Insured	No	No	No	0	Alive	29	Alive	Alive or dead of other cause	Alive or dead due to cancer
45	Other (American Indian/AK Native, Asian/Pacific Islander)	Asian or Pacific Islander	Female	8500	Poorly differentiated; Grade III	HR+/HER2- (Luminal A)	Positive	Positive	Negative	T2	N2NOS	M1	IV	Single (never married)	Insured	No	No	No	0	Alive	14	Alive	Alive or dead of other cause	Alive or dead due to cancer
62	White	White	Female	8500	Poorly differentiated; Grade III	HR-/HER2- (Triple Negative)	Negative	Negative	Negative	T4b	N2b	M1	IV	Divorced	Insured	Yes	No	No	0	Dead	1	Breast	Dead (attributable to this cancer dx)	Alive or dead due to cancer
55	Other (American Indian/AK Native, Asian/Pacific Islander)	Asian or Pacific Islander	Female	8500	Poorly differentiated; Grade III	HR+/HER2- (Luminal A)	Positive	Negative	Negative	T3	N1	M1	IV	Single (never married)	Insured	Yes	Yes	No	99	Alive	17	Alive	Alive or dead of other cause	Alive or dead due to cancer
62	Other (American Indian/AK Native, Asian/Pacific Islander)	Asian or Pacific Islander	Female	8500	Moderately differentiated; Grade II	HR+/HER2- (Luminal A)	Positive	Positive	Negative	T2	N0	M1	IV	Single (never married)	Any Medicaid	No	No	No	99	Alive	13	Alive	Alive or dead of other cause	Alive or dead due to cancer
53	Other (American Indian/AK Native, Asian/Pacific Islander)	Asian or Pacific Islander	Female	8500	Unknown	HR+/HER2- (Luminal A)	Positive	Positive	Negative	T4d	N1	M1	IV	Married (including common law)	Any Medicaid	Yes	No	No	0	Alive	2	Alive	Alive or dead of other cause	Alive or dead due to cancer
72	Other (American Indian/AK Native, Asian/Pacific Islander)	Asian or Pacific Islander	Female	8500	Moderately differentiated; Grade II	HR+/HER2+ (Luminal B)	Positive	Positive	Positive	T4b	N1	M1	IV	Widowed	Any Medicaid	No	No	No	0	Dead	7	Breast	Dead (attributable to this cancer dx)	Alive or dead due to cancer
61	White	White	Female	8520	Well differentiated; Grade I	HR+/HER2- (Luminal A)	Positive	Positive	Negative	T1c	N3a	M1	IV	Single (never married)	Insured	No	No	No	57	Alive	18	Alive	Alive or dead of other cause	Alive or dead due to cancer
83	Other (American Indian/AK Native, Asian/Pacific Islander)	Asian or Pacific Islander	Female	8523	Unknown	HR-/HER2- (Triple Negative)	Negative	Negative	Negative	T2	N2NOS	M1	IV	Widowed	Insured	No	No	No	0	Dead	5	Pneumonia and Influenza	Alive or dead of other cause	Dead (attributable to causes other than this cancer dx)
65	Other (American Indian/AK Native, Asian/Pacific Islander)	Asian or Pacific Islander	Female	8500	Unknown	HR+/HER2- (Luminal A)	Positive	Positive	Negative	T4b	N1	M1	IV	Single (never married)	Insured	No	Yes	No	0	Alive	22	Alive	Alive or dead of other cause	Alive or dead due to cancer
66	Other (American Indian/AK Native, Asian/Pacific Islander)	Asian or Pacific Islander	Female	8500	Poorly differentiated; Grade III	HR+/HER2- (Luminal A)	Positive	Positive	Negative	T4b	N3a	M1	IV	Single (never married)	Insured	No	No	No	51	Dead	11	Breast	Dead (attributable to this cancer dx)	Alive or dead due to cancer
69	Other (American Indian/AK Native, Asian/Pacific Islander)	Asian or Pacific Islander	Female	8520	Moderately differentiated; Grade II	HR+/HER2- (Luminal A)	Positive	Positive	Negative	T4c	N3a	M1	IV	Married (including common law)	Insured/No specifics	No	Yes	No	0	Dead	1	Breast	Dead (attributable to this cancer dx)	Alive or dead due to cancer
81	White	White	Female	8500	Moderately differentiated; Grade II	HR+/HER2- (Luminal A)	Positive	Positive	Negative	T1c	N0	M1	IV	Married (including common law)	Insured	No	Yes	Yes	0	Alive	15	Alive	Alive or dead of other cause	Alive or dead due to cancer
53	Other (American Indian/AK Native, Asian/Pacific Islander)	Asian or Pacific Islander	Female	8500	Moderately differentiated; Grade II	HR+/HER2- (Luminal A)	Positive	Negative	Negative	T4a	N1	M1	IV	Married (including common law)	Insured	No	No	No	52	Alive	15	Alive	Alive or dead of other cause	Alive or dead due to cancer
83	Other (American Indian/AK Native, Asian/Pacific Islander)	Asian or Pacific Islander	Female	8500	Moderately differentiated; Grade II	HR+/HER2- (Luminal A)	Positive	Positive	Negative	T2	N0	M1	IV	Widowed	Insured	No	No	No	0	Alive	13	Alive	Alive or dead of other cause	Alive or dead due to cancer
60	Other (American Indian/AK Native, Asian/Pacific Islander)	Asian or Pacific Islander	Female	8520	Unknown	HR+/HER2- (Luminal A)	Positive	Positive	Negative	T4b	N3a	M1	IV	Married (including common law)	Insured	No	No	No	0	Dead	22	Breast	Dead (attributable to this cancer dx)	Alive or dead due to cancer
64	Other (American Indian/AK Native, Asian/Pacific Islander)	Asian or Pacific Islander	Female	8500	Unknown	HR+/HER2- (Luminal A)	Positive	Negative	Negative	T4b	N3c	M1	IV	Single (never married)	Insured	No	No	No	0	Alive	15	Alive	Alive or dead of other cause	Alive or dead due to cancer
63	Other (American Indian/AK Native, Asian/Pacific Islander)	Asian or Pacific Islander	Female	8050	Moderately differentiated; Grade II	HR+/HER2- (Luminal A)	Positive	Positive	Negative	T3	N1	M1	IV	Married (including common law)	Insured	No	No	No	0	Alive	22	Alive	Alive or dead of other cause	Alive or dead due to cancer
82	Other (American Indian/AK Native, Asian/Pacific Islander)	Asian or Pacific Islander	Female	8500	Poorly differentiated; Grade III	HR-/HER2- (Triple Negative)	Negative	Negative	Negative	T2	N1	M1	IV	Widowed	Insured	No	No	Yes	99	Dead	6	Breast	Dead (attributable to this cancer dx)	Alive or dead due to cancer
82	Other (American Indian/AK Native, Asian/Pacific Islander)	Asian or Pacific Islander	Female	8520	Well differentiated; Grade I	HR+/HER2- (Luminal A)	Positive	Negative	Negative	T4a	N3a	M1	IV	Unknown	Insured	No	No	No	51	Alive	13	Alive	Alive or dead of other cause	Alive or dead due to cancer
27	White	White	Female	8500	Moderately differentiated; Grade II	HR+/HER2+ (Luminal B)	Positive	Positive	Positive	T3	N1	M1	IV	Married (including common law)	Insured	No	Yes	No	0	Alive	12	Alive	Alive or dead of other cause	Alive or dead due to cancer
45	White	White	Female	8523	Moderately differentiated; Grade II	HR+/HER2- (Luminal A)	Positive	Positive	Negative	T3	N1	M1	IV	Single (never married)	Insured	No	No	No	51	Alive	82	Alive	Alive or dead of other cause	Alive or dead due to cancer
65	White	White	Female	8500	Unknown	HR+/HER2+ (Luminal B)	Positive	Negative	Positive	T2	N1	M1	IV	Married (including common law)	Insured/No specifics	No	No	No	0	Dead	1	Breast	Dead (attributable to this cancer dx)	Alive or dead due to cancer
44	White	White	Female	8500	Moderately differentiated; Grade II	HR+/HER2+ (Luminal B)	Positive	Negative	Positive	T4b	N1	M1	IV	Married (including common law)	Insured	Yes	No	No	49	Alive	79	Alive	Alive or dead of other cause	Alive or dead due to cancer
85	White	White	Female	8500	Moderately differentiated; Grade II	HR+/HER2+ (Luminal B)	Positive	Positive	Positive	T2	N1	M1	IV	Widowed	Insured	No	Yes	Yes	0	Dead	1	Breast	Dead (attributable to this cancer dx)	Alive or dead due to cancer
61	White	White	Female	8522	Well differentiated; Grade I	HR+/HER2- (Luminal A)	Positive	Positive	Negative	T3	N3a	M1	IV	Single (never married)	Insured	No	No	No	52	Dead	79	Breast	Dead (attributable to this cancer dx)	Alive or dead due to cancer
85	White	White	Female	8500	Moderately differentiated; Grade II	HR+/HER2- (Luminal A)	Positive	Positive	Negative	T1c	N0	M1	IV	Widowed	Insured/No specifics	No	Yes	No	0	Dead	25	Accidents and Adverse Effects	Alive or dead of other cause	Dead (attributable to causes other than this cancer dx)
63	White	White	Female	8500	Poorly differentiated; Grade III	HR-/HER2- (Triple Negative)	Negative	Negative	Negative	T3	N3a	M1	IV	Married (including common law)	Insured	No	No	No	51	Dead	29	Breast	Dead (attributable to this cancer dx)	Alive or dead due to cancer
57	Black	Black	Female	8500	Unknown	HR-/HER2- (Triple Negative)	Negative	Negative	Negative	T2	N1	M1	IV	Single (never married)	Any Medicaid	No	No	Yes	0	Dead	8	Breast	Dead (attributable to this cancer dx)	Alive or dead due to cancer
75	Black	Black	Female	8500	Well differentiated; Grade I	HR+/HER2- (Luminal A)	Positive	Positive	Negative	T2	N1	M1	IV	Widowed	Insured/No specifics	No	No	No	0	Dead	49	Breast	Dead (attributable to this cancer dx)	Alive or dead due to cancer
60	White	White	Female	8500	Poorly differentiated; Grade III	HR+/HER2- (Luminal A)	Positive	Positive	Negative	T4b	N1	M1	IV	Widowed	Any Medicaid	No	No	No	52	Alive	83	Alive	Alive or dead of other cause	Alive or dead due to cancer
65	White	White	Female	8522	Well differentiated; Grade I	HR+/HER2- (Luminal A)	Positive	Positive	Negative	T2	N0	M1	IV	Married (including common law)	Insured	No	No	No	0	Dead	38	Breast	Dead (attributable to this cancer dx)	Alive or dead due to cancer
84	White	White	Female	8255	Well differentiated; Grade I	HR+/HER2- (Luminal A)	Positive	Positive	Negative	T4a	N0	M1	IV	Widowed	Insured	No	No	No	22	Dead	44	Other Cause of Death	Alive or dead of other cause	Dead (attributable to causes other than this cancer dx)
38	White	White	Female	8500	Poorly differentiated; Grade III	HR+/HER2+ (Luminal B)	Positive	Positive	Positive	T4b	N1	M1	IV	Separated	Insured/No specifics	No	No	No	0	Alive	75	Alive	Alive or dead of other cause	Alive or dead due to cancer
40	White	White	Female	8500	Moderately differentiated; Grade II	HR+/HER2- (Luminal A)	Positive	Positive	Negative	T2	N1	M1	IV	Married (including common law)	Insured	No	Yes	No	0	Alive	78	Alive	Alive or dead of other cause	Alive or dead due to cancer
42	White	White	Female	8500	Moderately differentiated; Grade II	HR+/HER2- (Luminal A)	Positive	Positive	Negative	T4d	N3a	M1	IV	Single (never married)	Any Medicaid	No	No	No	51	Alive	83	Alive	Alive or dead of other cause	Alive or dead due to cancer
87	White	White	Female	8500	Moderately differentiated; Grade II	HR+/HER2- (Luminal A)	Positive	Positive	Negative	T1b	N1	M1	IV	Widowed	Insured	No	No	No	0	Dead	30	Breast	Dead (attributable to this cancer dx)	Alive or dead due to cancer
58	White	White	Female	8522	Moderately differentiated; Grade II	HR+/HER2- (Luminal A)	Positive	Positive	Negative	T1c	N1	M1	IV	Widowed	Any Medicaid	No	No	No	50	Dead	44	Breast	Dead (attributable to this cancer dx)	Alive or dead due to cancer
51	White	White	Female	8500	Poorly differentiated; Grade III	HR-/HER2+ (HER2 enriched)	Negative	Negative	Positive	T4b	N1	M1	IV	Married (including common law)	Insured/No specifics	No	No	No	51	Alive	76	Alive	Alive or dead of other cause	Alive or dead due to cancer
61	White	White	Female	8500	Poorly differentiated; Grade III	HR-/HER2- (Triple Negative)	Negative	Negative	Negative	T3	N1	M1	IV	Separated	Any Medicaid	Yes	No	Yes	0	Dead	19	Breast	Dead (attributable to this cancer dx)	Alive or dead due to cancer
58	White	White	Female	8522	Unknown	HR+/HER2- (Luminal A)	Positive	Negative	Negative	T4d	N0	M1	IV	Single (never married)	Insured	No	No	No	0	Dead	22	Breast	Dead (attributable to this cancer dx)	Alive or dead due to cancer
65	White	White	Female	8500	Poorly differentiated; Grade III	HR+/HER2- (Luminal A)	Positive	Positive	Negative	T3	N3a	M1	IV	Married (including common law)	Insured	No	No	No	52	Dead	41	Breast	Dead (attributable to this cancer dx)	Alive or dead due to cancer
72	White	White	Female	8480	Well differentiated; Grade I	HR+/HER2- (Luminal A)	Positive	Positive	Negative	T1c	N1a	M1	IV	Married (including common law)	Insured	No	No	No	0	Dead	14	Breast	Dead (attributable to this cancer dx)	Alive or dead due to cancer
69	White	White	Female	8522	Poorly differentiated; Grade III	HR-/HER2- (Triple Negative)	Negative	Negative	Negative	T4d	N1	M1	IV	Married (including common law)	Insured	No	Yes	No	0	Dead	17	Breast	Dead (attributable to this cancer dx)	Alive or dead due to cancer
83	White	White	Female	8500	Well differentiated; Grade I	HR+/HER2- (Luminal A)	Positive	Positive	Negative	T4b	N3b	M1	IV	Widowed	Insured	No	No	Yes	0	Dead	66	Breast	Dead (attributable to this cancer dx)	Alive or dead due to cancer
65	White	White	Female	8500	Poorly differentiated; Grade III	HR+/HER2- (Luminal A)	Positive	Positive	Negative	T4b	N1	M1	IV	Married (including common law)	Insured	No	Yes	Yes	0	Dead	44	Breast	Dead (attributable to this cancer dx)	Alive or dead due to cancer
38	White	White	Female	8500	Poorly differentiated; Grade III	HR-/HER2+ (HER2 enriched)	Negative	Negative	Positive	T3	N1NOS	M1	IV	Married (including common law)	Insured	No	Yes	No	52	Dead	62	Breast	Dead (attributable to this cancer dx)	Alive or dead due to cancer
60	White	White	Female	8520	Moderately differentiated; Grade II	HR+/HER2- (Luminal A)	Positive	Positive	Negative	T2	N1	M1	IV	Married (including common law)	Insurance status unknown	No	No	No	0	Alive	74	Alive	Alive or dead of other cause	Alive or dead due to cancer
77	White	White	Female	8500	Well differentiated; Grade I	HR+/HER2- (Luminal A)	Positive	Positive	Negative	T2	N3a	M1	IV	Married (including common law)	Insured	No	No	No	23	Dead	28	Breast	Dead (attributable to this cancer dx)	Alive or dead due to cancer
72	White	White	Female	8500	Poorly differentiated; Grade III	HR-/HER2+ (HER2 enriched)	Negative	Negative	Positive	T2	N2a	M1	IV	Widowed	Insured	No	Yes	Yes	51	Dead	16	Breast	Dead (attributable to this cancer dx)	Alive or dead due to cancer
53	White	White	Female	8500	Moderately differentiated; Grade II	HR-/HER2+ (HER2 enriched)	Negative	Negative	Positive	T3	N1	M1	IV	Married (including common law)	Insured/No specifics	No	Yes	Yes	0	Dead	9	Breast	Dead (attributable to this cancer dx)	Alive or dead due to cancer
43	White	White	Female	8010	Unknown	HR+/HER2+ (Luminal B)	Positive	Negative	Positive	T4d	N3c	M1	IV	Single (never married)	Insured	No	No	No	0	Dead	12	Breast	Dead (attributable to this cancer dx)	Alive or dead due to cancer
76	White	White	Female	8500	Moderately differentiated; Grade II	HR+/HER2- (Luminal A)	Positive	Positive	Negative	T4b	N1a	M1	IV	Married (including common law)	Insured	No	No	No	51	Alive	75	Alive	Alive or dead of other cause	Alive or dead due to cancer
56	White	White	Female	8541	Poorly differentiated; Grade III	HR+/HER2- (Luminal A)	Positive	Positive	Negative	T4b	N2a	M1	IV	Single (never married)	Insured	No	No	Yes	51	Dead	11	Breast	Dead (attributable to this cancer dx)	Alive or dead due to cancer
55	White	White	Female	8500	Poorly differentiated; Grade III	HR+/HER2- (Luminal A)	Positive	Positive	Negative	T2	N2a	M1	IV	Married (including common law)	Insured	No	Yes	No	22	Dead	14	Breast	Dead (attributable to this cancer dx)	Alive or dead due to cancer
76	Black	Black	Female	8500	Moderately differentiated; Grade II	HR+/HER2- (Luminal A)	Positive	Positive	Negative	T4b	N1a	M1	IV	Widowed	Insurance status unknown	No	No	No	51	Alive	74	Alive	Alive or dead of other cause	Alive or dead due to cancer
41	White	White	Female	8500	Moderately differentiated; Grade II	HR+/HER2- (Luminal A)	Positive	Positive	Negative	T3	N2a	M1	IV	Married (including common law)	Insured/No specifics	No	Yes	No	55	Dead	58	Breast	Dead (attributable to this cancer dx)	Alive or dead due to cancer
57	White	White	Female	8500	Moderately differentiated; Grade II	HR+/HER2- (Luminal A)	Positive	Positive	Negative	T3	N1	M1	IV	Single (never married)	Insured	No	No	No	0	Alive	72	Alive	Alive or dead of other cause	Alive or dead due to cancer
53	White	White	Female	8500	Poorly differentiated; Grade III	HR+/HER2+ (Luminal B)	Positive	Positive	Positive	T3	N3c	M1	IV	Married (including common law)	Insurance status unknown	No	No	No	55	Alive	77	Alive	Alive or dead of other cause	Alive or dead due to cancer
62	White	White	Female	8522	Well differentiated; Grade I	HR+/HER2- (Luminal A)	Positive	Positive	Negative	T4b	N1	M1	IV	Married (including common law)	Any Medicaid	No	No	No	0	Alive	73	Alive	Alive or dead of other cause	Alive or dead due to cancer
82	White	White	Female	8500	Moderately differentiated; Grade II	HR+/HER2- (Luminal A)	Positive	Positive	Negative	T4b	N1a	M1	IV	Married (including common law)	Insured	No	No	Yes	40	Alive	66	Alive	Alive or dead of other cause	Alive or dead due to cancer
63	White	White	Female	8500	Poorly differentiated; Grade III	HR+/HER2+ (Luminal B)	Positive	Negative	Positive	T2	N2a	M1	IV	Widowed	Insured	No	No	No	0	Alive	74	Alive	Alive or dead of other cause	Alive or dead due to cancer
55	White	White	Female	8500	Poorly differentiated; Grade III	HR+/HER2- (Luminal A)	Positive	Positive	Negative	T2	N2a	M1	IV	Married (including common law)	Any Medicaid	No	No	No	22	Dead	46	Breast	Dead (attributable to this cancer dx)	Alive or dead due to cancer
47	White	White	Female	8500	Moderately differentiated; Grade II	HR+/HER2- (Luminal A)	Positive	Positive	Negative	T2	N1a	M1	IV	Married (including common law)	Insured	No	No	No	52	Alive	36	Alive	Alive or dead of other cause	Alive or dead due to cancer
66	White	White	Female	8500	Moderately differentiated; Grade II	HR+/HER2- (Luminal A)	Positive	Negative	Negative	T4d	N1a	M1	IV	Married (including common law)	Insured	No	No	No	51	Dead	19	Breast	Dead (attributable to this cancer dx)	Alive or dead due to cancer
72	White	White	Female	8520	Poorly differentiated; Grade III	HR+/HER2- (Luminal A)	Positive	Negative	Negative	T3	N1	M1	IV	Single (never married)	Insured	No	No	No	0	Dead	42	Breast	Dead (attributable to this cancer dx)	Alive or dead due to cancer
69	White	White	Female	8500	Unknown	HR+/HER2- (Luminal A)	Positive	Positive	Negative	T4c	N2a	M1	IV	Married (including common law)	Insured/No specifics	No	No	Yes	0	Dead	2	Breast	Dead (attributable to this cancer dx)	Alive or dead due to cancer
56	White	White	Female	8500	Moderately differentiated; Grade II	HR+/HER2- (Luminal A)	Positive	Positive	Negative	T1c	N0	M1	IV	Married (including common law)	Insured	No	No	No	0	Dead	16	Breast	Dead (attributable to this cancer dx)	Alive or dead due to cancer
61	White	White	Female	8500	Well differentiated; Grade I	HR+/HER2- (Luminal A)	Positive	Positive	Negative	T2	N2a	M1	IV	Married (including common law)	Insured	No	No	No	51	Alive	67	Alive	Alive or dead of other cause	Alive or dead due to cancer
71	White	White	Female	8500	Poorly differentiated; Grade III	HR+/HER2+ (Luminal B)	Positive	Negative	Positive	T4a	N1	M1	IV	Married (including common law)	Insured	No	No	No	0	Alive	69	Alive	Alive or dead of other cause	Alive or dead due to cancer
59	White	White	Female	8500	Well differentiated; Grade I	HR+/HER2- (Luminal A)	Positive	Negative	Negative	T3	N1	M1	IV	Married (including common law)	Insured	No	No	Yes	41	Dead	29	Breast	Dead (attributable to this cancer dx)	Alive or dead due to cancer
31	Black	Black	Female	8500	Poorly differentiated; Grade III	HR-/HER2+ (HER2 enriched)	Negative	Negative	Positive	T2	N3c	M1	IV	Married (including common law)	Any Medicaid	Yes	No	Yes	22	Dead	9	Breast	Dead (attributable to this cancer dx)	Alive or dead due to cancer
58	White	White	Female	8490	Moderately differentiated; Grade II	HR+/HER2- (Luminal A)	Positive	Positive	Negative	T4b	N0	M1	IV	Single (never married)	Insured/No specifics	No	No	No	0	Dead	24	Breast	Dead (attributable to this cancer dx)	Alive or dead due to cancer
65	White	White	Female	8500	Poorly differentiated; Grade III	HR+/HER2+ (Luminal B)	Positive	Negative	Positive	T4b	N1	M1	IV	Married (including common law)	Insured	No	Yes	Yes	0	Dead	30	Breast	Dead (attributable to this cancer dx)	Alive or dead due to cancer
47	White	White	Female	8500	Poorly differentiated; Grade III	HR+/HER2- (Luminal A)	Positive	Positive	Negative	T2	N1	M1	IV	Married (including common law)	Insured	No	No	No	24	Alive	65	Alive	Alive or dead of other cause	Alive or dead due to cancer
57	White	White	Female	8500	Poorly differentiated; Grade III	HR-/HER2+ (HER2 enriched)	Negative	Negative	Positive	T4d	N2a	M1	IV	Married (including common law)	Insured/No specifics	No	No	No	51	Alive	67	Alive	Alive or dead of other cause	Alive or dead due to cancer
79	White	White	Female	8500	Poorly differentiated; Grade III	HR-/HER2- (Triple Negative)	Negative	Negative	Negative	T2	N1	M1	IV	Married (including common law)	Insured	No	Yes	No	0	Dead	3	Cerebrovascular Diseases	Alive or dead of other cause	Dead (attributable to causes other than this cancer dx)
50	White	White	Female	8522	Moderately differentiated; Grade II	HR+/HER2- (Luminal A)	Positive	Positive	Negative	T4d	N3a	M1	IV	Single (never married)	Insured	No	No	Yes	52	Dead	28	Breast	Dead (attributable to this cancer dx)	Alive or dead due to cancer
64	White	White	Female	8500	Poorly differentiated; Grade III	HR-/HER2- (Triple Negative)	Negative	Negative	Negative	T4d	N3b	M1	IV	Widowed	Any Medicaid	No	No	No	52	Dead	19	Breast	Dead (attributable to this cancer dx)	Alive or dead due to cancer
47	White	White	Female	8522	Poorly differentiated; Grade III	HR+/HER2- (Luminal A)	Positive	Negative	Negative	T4c	N1	M1	IV	Married (including common law)	Insured	No	No	Yes	41	Dead	46	Breast	Dead (attributable to this cancer dx)	Alive or dead due to cancer
54	White	White	Female	8500	Moderately differentiated; Grade II	HR+/HER2- (Luminal A)	Positive	Negative	Negative	T1c	N2a	M1	IV	Married (including common law)	Insurance status unknown	No	No	No	22	Alive	60	Alive	Alive or dead of other cause	Alive or dead due to cancer
82	White	White	Female	8140	Unknown	HR-/HER2+ (HER2 enriched)	Negative	Negative	Positive	T4a	N3b	M1	IV	Widowed	Insured	No	No	Yes	24	Alive	61	Alive	Alive or dead of other cause	Alive or dead due to cancer
57	White	White	Female	8520	Well differentiated; Grade I	HR+/HER2- (Luminal A)	Positive	Positive	Negative	T3	N3a	M1	IV	Married (including common law)	Insured	No	No	No	52	Dead	46	Breast	Dead (attributable to this cancer dx)	Alive or dead due to cancer
72	White	White	Female	8520	Moderately differentiated; Grade II	HR+/HER2- (Luminal A)	Positive	Positive	Negative	T1c	N1	M1	IV	Married (including common law)	Insured	No	No	No	0	Dead	36	Breast	Dead (attributable to this cancer dx)	Alive or dead due to cancer
56	White	White	Female	8500	Poorly differentiated; Grade III	HR-/HER2+ (HER2 enriched)	Negative	Negative	Positive	T1b	N0	M1	IV	Married (including common law)	Insured	No	Yes	No	0	Dead	1	Breast	Dead (attributable to this cancer dx)	Alive or dead due to cancer
59	White	White	Female	8140	Unknown	HR+/HER2- (Luminal A)	Positive	Positive	Negative	T4b	N2a	M1	IV	Single (never married)	Any Medicaid	Yes	No	Yes	0	Dead	31	Breast	Dead (attributable to this cancer dx)	Alive or dead due to cancer
70	White	White	Female	8500	Moderately differentiated; Grade II	HR+/HER2- (Luminal A)	Positive	Negative	Negative	T2	N0	M1	IV	Single (never married)	Insured	No	No	No	0	Dead	57	Breast	Dead (attributable to this cancer dx)	Alive or dead due to cancer
28	Black	Black	Female	8500	Moderately differentiated; Grade II	HR+/HER2- (Luminal A)	Positive	Positive	Negative	T4d	N1	M1	IV	Married (including common law)	Any Medicaid	No	No	No	52	Dead	38	Breast	Dead (attributable to this cancer dx)	Alive or dead due to cancer
75	White	White	Female	8520	Unknown	HR+/HER2- (Luminal A)	Positive	Positive	Negative	T2	N3a	M1	IV	Married (including common law)	Insured	No	No	No	0	Alive	61	Alive	Alive or dead of other cause	Alive or dead due to cancer
77	White	White	Female	8500	Well differentiated; Grade I	HR+/HER2- (Luminal A)	Positive	Negative	Negative	T2	N1	M1	IV	Single (never married)	Insured	No	Yes	No	0	Dead	52	Breast	Dead (attributable to this cancer dx)	Alive or dead due to cancer
40	White	White	Female	8500	Poorly differentiated; Grade III	HR-/HER2- (Triple Negative)	Negative	Negative	Negative	T4d	N3b	M1	IV	Married (including common law)	Any Medicaid	Yes	Yes	Yes	41	Dead	6	Breast	Dead (attributable to this cancer dx)	Alive or dead due to cancer
83	White	White	Female	8520	Moderately differentiated; Grade II	HR+/HER2- (Luminal A)	Positive	Positive	Negative	T3	N1	M1	IV	Widowed	Insured	Yes	No	Yes	0	Dead	2	Breast	Dead (attributable to this cancer dx)	Alive or dead due to cancer
54	White	White	Female	8500	Poorly differentiated; Grade III	HR-/HER2+ (HER2 enriched)	Negative	Negative	Positive	T3	N2a	M1	IV	Divorced	Any Medicaid	Yes	Yes	Yes	0	Dead	4	Breast	Dead (attributable to this cancer dx)	Alive or dead due to cancer
47	White	White	Female	8530	Unknown	HR+/HER2- (Luminal A)	Positive	Negative	Negative	T4d	N3b	M1	IV	Married (including common law)	Insured	No	No	No	0	Dead	17	Breast	Dead (attributable to this cancer dx)	Alive or dead due to cancer
64	White	White	Female	8500	Moderately differentiated; Grade II	HR+/HER2+ (Luminal B)	Positive	Positive	Positive	T1c	N3c	M1	IV	Single (never married)	Insured	No	No	No	22	Alive	61	Alive	Alive or dead of other cause	Alive or dead due to cancer
50	White	White	Female	8500	Well differentiated; Grade I	HR+/HER2- (Luminal A)	Positive	Negative	Negative	T2	N2NOS	M1	IV	Divorced	Any Medicaid	No	No	No	51	Dead	56	Breast	Dead (attributable to this cancer dx)	Alive or dead due to cancer
37	White	White	Female	8520	Moderately differentiated; Grade II	HR+/HER2- (Luminal A)	Positive	Positive	Negative	T2	N1	M1	IV	Married (including common law)	Insured	No	No	No	59	Dead	43	Breast	Dead (attributable to this cancer dx)	Alive or dead due to cancer
48	White	White	Female	8500	Poorly differentiated; Grade III	HR-/HER2- (Triple Negative)	Negative	Negative	Negative	T3	N3c	M1	IV	Married (including common law)	Insured	No	Yes	No	0	Dead	14	Breast	Dead (attributable to this cancer dx)	Alive or dead due to cancer
54	White	White	Female	8500	Moderately differentiated; Grade II	HR+/HER2- (Luminal A)	Positive	Positive	Negative	T1c	N1	M1	IV	Single (never married)	Insured	No	No	No	0	Alive	63	Alive	Alive or dead of other cause	Alive or dead due to cancer
69	White	White	Female	8500	Well differentiated; Grade I	HR+/HER2- (Luminal A)	Positive	Positive	Negative	T4d	N1	M1	IV	Divorced	Any Medicaid	No	No	No	0	Alive	55	Alive	Alive or dead of other cause	Alive or dead due to cancer
64	White	White	Female	8522	Poorly differentiated; Grade III	HR+/HER2- (Luminal A)	Positive	Positive	Negative	T3	N1a	M1	IV	Single (never married)	Insured	No	No	Yes	51	Dead	15	Breast	Dead (attributable to this cancer dx)	Alive or dead due to cancer
57	White	White	Female	8500	Poorly differentiated; Grade III	HR-/HER2+ (HER2 enriched)	Negative	Negative	Positive	T2	N3c	M1	IV	Divorced	Insured	No	Yes	Yes	0	Dead	16	Breast	Dead (attributable to this cancer dx)	Alive or dead due to cancer
41	White	White	Female	8500	Well differentiated; Grade I	HR+/HER2- (Luminal A)	Positive	Positive	Negative	T1b	N2a	M1	IV	Married (including common law)	Insured	No	Yes	No	23	Dead	33	Breast	Dead (attributable to this cancer dx)	Alive or dead due to cancer
47	Black	Black	Female	8500	Poorly differentiated; Grade III	HR+/HER2- (Luminal A)	Positive	Positive	Negative	T4b	N1a	M1	IV	Single (never married)	Insured	No	No	No	51	Alive	59	Alive	Alive or dead of other cause	Alive or dead due to cancer
58	White	White	Female	8500	Poorly differentiated; Grade III	HR+/HER2+ (Luminal B)	Positive	Negative	Positive	T3	N2a	M1	IV	Married (including common law)	Insured/No specifics	Yes	No	Yes	0	Dead	1	Breast	Dead (attributable to this cancer dx)	Alive or dead due to cancer
55	White	White	Female	8522	Poorly differentiated; Grade III	HR+/HER2- (Luminal A)	Positive	Positive	Negative	T2	N2a	M1	IV	Divorced	Any Medicaid	No	No	No	51	Dead	47	Breast	Dead (attributable to this cancer dx)	Alive or dead due to cancer
61	White	White	Male	8500	Poorly differentiated; Grade III	HR+/HER2- (Luminal A)	Positive	Positive	Negative	T4a	N1	M1	IV	Married (including common law)	Insured	No	No	No	41	Alive	57	Alive	Alive or dead of other cause	Alive or dead due to cancer
48	White	White	Female	8500	Poorly differentiated; Grade III	HR+/HER2- (Luminal A)	Positive	Positive	Negative	T3	N2a	M1	IV	Divorced	Any Medicaid	No	No	No	51	Dead	2	Other Cause of Death	Alive or dead of other cause	Dead (attributable to causes other than this cancer dx)
72	White	White	Female	8523	Moderately differentiated; Grade II	HR+/HER2+ (Luminal B)	Positive	Negative	Positive	T4d	N1	M1	IV	Divorced	Insured/No specifics	No	No	No	0	Dead	47	Breast	Dead (attributable to this cancer dx)	Alive or dead due to cancer
65	White	White	Female	8500	Moderately differentiated; Grade II	HR+/HER2- (Luminal A)	Positive	Positive	Negative	T4a	N3b	M1	IV	Married (including common law)	Insured	No	No	No	0	Alive	58	Alive	Alive or dead of other cause	Alive or dead due to cancer
78	White	White	Female	8500	Well differentiated; Grade I	HR+/HER2- (Luminal A)	Positive	Positive	Negative	T4b	N1	M1	IV	Widowed	Insured	No	No	No	51	Alive	58	Alive	Alive or dead of other cause	Alive or dead due to cancer
50	White	White	Female	8520	Moderately differentiated; Grade II	HR+/HER2- (Luminal A)	Positive	Negative	Negative	T2	N0	M1	IV	Single (never married)	Insured/No specifics	No	No	No	0	Dead	26	Breast	Dead (attributable to this cancer dx)	Alive or dead due to cancer
76	White	White	Female	8520	Unknown	HR-/HER2+ (HER2 enriched)	Negative	Negative	Positive	T4d	N1	M1	IV	Single (never married)	Insured	No	No	No	0	Dead	4	Breast	Dead (attributable to this cancer dx)	Alive or dead due to cancer
60	White	White	Female	8500	Moderately differentiated; Grade II	HR-/HER2+ (HER2 enriched)	Negative	Negative	Positive	T1b	N1	M1	IV	Married (including common law)	Insured	No	No	No	0	Alive	49	Alive	Alive or dead of other cause	Alive or dead due to cancer
78	White	White	Male	8010	Poorly differentiated; Grade III	HR-/HER2- (Triple Negative)	Negative	Negative	Negative	T2	N0	M1	IV	Married (including common law)	Insured	No	No	No	22	Dead	3	Breast	Dead (attributable to this cancer dx)	Alive or dead due to cancer
62	White	White	Female	8520	Moderately differentiated; Grade II	HR+/HER2- (Luminal A)	Positive	Positive	Negative	T3	N1	M1	IV	Divorced	Insured	No	Yes	No	0	Dead	1	Breast	Dead (attributable to this cancer dx)	Alive or dead due to cancer
63	White	White	Female	8520	Well differentiated; Grade I	HR+/HER2- (Luminal A)	Positive	Positive	Negative	T2	N1	M1	IV	Married (including common law)	Uninsured	No	No	No	0	Dead	36	Breast	Dead (attributable to this cancer dx)	Alive or dead due to cancer
86	White	White	Female	8010	Unknown	HR-/HER2- (Triple Negative)	Negative	Negative	Negative	T4a	N1	M1	IV	Widowed	Insured	No	No	No	0	Dead	4	Breast	Dead (attributable to this cancer dx)	Alive or dead due to cancer
60	White	White	Female	8500	Moderately differentiated; Grade II	HR+/HER2- (Luminal A)	Positive	Positive	Negative	T1c	N0	M1	IV	Single (never married)	Uninsured	No	No	No	0	Alive	48	Alive	Alive or dead of other cause	Alive or dead due to cancer
46	White	White	Female	8500	Poorly differentiated; Grade III	HR-/HER2+ (HER2 enriched)	Negative	Negative	Positive	T3	N3b	M1	IV	Married (including common law)	Insured	No	Yes	No	0	Dead	20	Breast	Dead (attributable to this cancer dx)	Alive or dead due to cancer
60	White	White	Female	8520	Unknown	HR+/HER2- (Luminal A)	Positive	Positive	Negative	T1a	N1	M1	IV	Married (including common law)	Insured	No	No	No	0	Dead	33	Breast	Dead (attributable to this cancer dx)	Alive or dead due to cancer
34	White	White	Female	8010	Poorly differentiated; Grade III	HR+/HER2- (Luminal A)	Positive	Negative	Negative	T4b	N1	M1	IV	Single (never married)	Any Medicaid	Yes	No	No	0	Dead	1	Breast	Dead (attributable to this cancer dx)	Alive or dead due to cancer
46	Black	Black	Female	8500	Poorly differentiated; Grade III	HR-/HER2- (Triple Negative)	Negative	Negative	Negative	T4d	N2a	M1	IV	Single (never married)	Any Medicaid	No	No	No	51	Dead	41	Breast	Dead (attributable to this cancer dx)	Alive or dead due to cancer
86	White	White	Female	8500	Well differentiated; Grade I	HR+/HER2- (Luminal A)	Positive	Positive	Negative	T4b	N3a	M1	IV	Widowed	Insured	No	No	No	0	Dead	37	Breast	Dead (attributable to this cancer dx)	Alive or dead due to cancer
61	White	White	Female	8500	Poorly differentiated; Grade III	HR+/HER2+ (Luminal B)	Positive	Negative	Positive	T4b	N1	M1	IV	Married (including common law)	Insured	No	Yes	No	0	Alive	55	Alive	Alive or dead of other cause	Alive or dead due to cancer
60	White	White	Female	8500	Moderately differentiated; Grade II	HR+/HER2- (Luminal A)	Positive	Positive	Negative	T1c	N0	M1	IV	Married (including common law)	Insured	No	No	No	24	Dead	48	Breast	Dead (attributable to this cancer dx)	Alive or dead due to cancer
70	White	White	Female	8500	Poorly differentiated; Grade III	HR-/HER2+ (HER2 enriched)	Negative	Negative	Positive	T2	N3c	M1	IV	Married (including common law)	Insured	No	No	No	51	Dead	45	Breast	Dead (attributable to this cancer dx)	Alive or dead due to cancer
81	White	White	Female	8500	Moderately differentiated; Grade II	HR+/HER2- (Luminal A)	Positive	Negative	Negative	T3	N1	M1	IV	Widowed	Insured	No	No	No	0	Dead	7	Diseases of Heart	Alive or dead of other cause	Dead (attributable to causes other than this cancer dx)
67	White	White	Female	8500	Moderately differentiated; Grade II	HR+/HER2+ (Luminal B)	Positive	Positive	Positive	T4d	N1	M1	IV	Single (never married)	Insured	No	No	No	0	Alive	57	Alive	Alive or dead of other cause	Alive or dead due to cancer
79	White	White	Female	8500	Moderately differentiated; Grade II	HR+/HER2- (Luminal A)	Positive	Positive	Negative	T2	N0	M1	IV	Married (including common law)	Any Medicaid	No	No	No	0	Dead	1	Breast	Dead (attributable to this cancer dx)	Alive or dead due to cancer
85	White	White	Female	8522	Moderately differentiated; Grade II	HR+/HER2- (Luminal A)	Positive	Positive	Negative	T2	N1	M1	IV	Widowed	Insured	No	Yes	No	0	Dead	3	Breast	Dead (attributable to this cancer dx)	Alive or dead due to cancer
58	White	White	Female	8010	Unknown	HR+/HER2- (Luminal A)	Positive	Positive	Negative	T4b	N1	M1	IV	Married (including common law)	Insured	No	No	Yes	0	Dead	19	Diseases of Heart	Alive or dead of other cause	Dead (attributable to causes other than this cancer dx)
50	White	White	Female	8522	Unknown	HR+/HER2- (Luminal A)	Positive	Positive	Negative	T2	N1	M1	IV	Married (including common law)	Insured	No	No	No	0	Alive	52	Alive	Alive or dead of other cause	Alive or dead due to cancer
42	White	White	Female	8500	Poorly differentiated; Grade III	HR+/HER2+ (Luminal B)	Positive	Positive	Positive	T2	N0(i-)	M1	IV	Married (including common law)	Insured/No specifics	No	No	No	22	Alive	44	Alive	Alive or dead of other cause	Alive or dead due to cancer
76	White	White	Female	8500	Moderately differentiated; Grade II	HR+/HER2- (Luminal A)	Positive	Positive	Negative	T2	N1	M1	IV	Married (including common law)	Insured	No	No	No	0	Dead	2	Breast	Dead (attributable to this cancer dx)	Alive or dead due to cancer
59	White	White	Female	8520	Moderately differentiated; Grade II	HR+/HER2+ (Luminal B)	Positive	Positive	Positive	T4d	N0	M1	IV	Unknown	Insured	No	No	No	22	Alive	57	Alive	Alive or dead of other cause	Alive or dead due to cancer
41	White	White	Female	8140	Unknown	HR-/HER2+ (HER2 enriched)	Negative	Negative	Positive	T4b	N2a	M1	IV	Single (never married)	Insured	No	Yes	No	0	Dead	32	Breast	Dead (attributable to this cancer dx)	Alive or dead due to cancer
54	White	White	Female	8500	Moderately differentiated; Grade II	HR+/HER2- (Luminal A)	Positive	Positive	Negative	T4b	N1	M1	IV	Unknown	Insurance status unknown	No	No	Yes	0	Alive	44	Alive	Alive or dead of other cause	Alive or dead due to cancer
84	White	White	Female	8140	Unknown	HR+/HER2- (Luminal A)	Positive	Positive	Negative	T2	N0	M1	IV	Single (never married)	Insured	No	No	No	0	Alive	59	Alive	Alive or dead of other cause	Alive or dead due to cancer
83	White	White	Female	8500	Moderately differentiated; Grade II	HR+/HER2- (Luminal A)	Positive	Positive	Negative	T2	N1	M1	IV	Married (including common law)	Insured	No	No	Yes	0	Dead	18	Other Cause of Death	Alive or dead of other cause	Dead (attributable to causes other than this cancer dx)
71	White	White	Female	8520	Moderately differentiated; Grade II	HR+/HER2- (Luminal A)	Positive	Positive	Negative	T2	N3c	M1	IV	Married (including common law)	Insured	No	No	No	0	Alive	48	Alive	Alive or dead of other cause	Alive or dead due to cancer
47	White	White	Female	8500	Poorly differentiated; Grade III	HR+/HER2- (Luminal A)	Positive	Positive	Negative	T2	N1	M1	IV	Married (including common law)	Insured	No	Yes	No	0	Dead	17	Breast	Dead (attributable to this cancer dx)	Alive or dead due to cancer
47	White	White	Female	8523	Poorly differentiated; Grade III	HR+/HER2+ (Luminal B)	Positive	Negative	Positive	T4d	N3c	M1	IV	Married (including common law)	Insured	No	No	No	0	Alive	50	Alive	Alive or dead of other cause	Alive or dead due to cancer
60	White	White	Female	8500	Moderately differentiated; Grade II	HR+/HER2- (Luminal A)	Positive	Positive	Negative	T4d	N1	M1	IV	Married (including common law)	Insured	No	No	No	0	Dead	17	Accidents and Adverse Effects	Alive or dead of other cause	Dead (attributable to causes other than this cancer dx)
56	White	White	Female	8507	Well differentiated; Grade I	HR+/HER2- (Luminal A)	Positive	Positive	Negative	T2	N3a	M1	IV	Married (including common law)	Insured	No	No	No	22	Alive	44	Alive	Alive or dead of other cause	Alive or dead due to cancer
65	White	White	Female	8500	Moderately differentiated; Grade II	HR+/HER2+ (Luminal B)	Positive	Positive	Positive	T3	N3a	M1	IV	Single (never married)	Insured	No	No	No	51	Alive	45	Alive	Alive or dead of other cause	Alive or dead due to cancer
75	White	White	Female	8140	Unknown	HR+/HER2- (Luminal A)	Positive	Positive	Negative	T3	N1	M1	IV	Married (including common law)	Insured	No	No	No	0	Alive	54	Alive	Alive or dead of other cause	Alive or dead due to cancer
62	White	White	Female	8520	Unknown	HR+/HER2- (Luminal A)	Positive	Positive	Negative	T4b	N3c	M1	IV	Married (including common law)	Insured	No	Yes	No	0	Dead	3	Breast	Dead (attributable to this cancer dx)	Alive or dead due to cancer
72	White	White	Female	8500	Poorly differentiated; Grade III	HR-/HER2+ (HER2 enriched)	Negative	Negative	Positive	T4b	N3c	M1	IV	Widowed	Insured	No	No	No	0	Dead	4	Breast	Dead (attributable to this cancer dx)	Alive or dead due to cancer
76	White	White	Female	8520	Moderately differentiated; Grade II	HR+/HER2- (Luminal A)	Positive	Positive	Negative	T2	N0	M1	IV	Married (including common law)	Any Medicaid	No	No	No	41	Dead	43	Breast	Dead (attributable to this cancer dx)	Alive or dead due to cancer
77	White	White	Female	8500	Moderately differentiated; Grade II	HR+/HER2- (Luminal A)	Positive	Positive	Negative	T4b	N1	M1	IV	Married (including common law)	Insured	No	No	No	0	Alive	43	Alive	Alive or dead of other cause	Alive or dead due to cancer
82	White	White	Female	8500	Unknown	HR+/HER2- (Luminal A)	Positive	Positive	Negative	T1NOS	N0	M1	IV	Widowed	Insured	No	No	No	0	Dead	45	Breast	Dead (attributable to this cancer dx)	Alive or dead due to cancer
28	White	White	Female	8500	Poorly differentiated; Grade III	HR+/HER2- (Luminal A)	Positive	Positive	Negative	T2	N3c	M1	IV	Married (including common law)	Insured	No	No	Yes	0	Dead	35	Breast	Dead (attributable to this cancer dx)	Alive or dead due to cancer
83	White	White	Female	8500	Poorly differentiated; Grade III	HR+/HER2- (Luminal A)	Positive	Negative	Negative	T4b	N0	M1	IV	Single (never married)	Insured/No specifics	No	No	No	0	Dead	16	Breast	Dead (attributable to this cancer dx)	Alive or dead due to cancer
64	White	White	Female	8500	Moderately differentiated; Grade II	HR-/HER2+ (HER2 enriched)	Negative	Negative	Positive	T2	N0	M1	IV	Married (including common law)	Insured	No	No	No	0	Dead	42	Breast	Dead (attributable to this cancer dx)	Alive or dead due to cancer
50	White	White	Female	8140	Moderately differentiated; Grade II	HR+/HER2- (Luminal A)	Positive	Positive	Negative	T2	N3b	M1	IV	Divorced	Insured	No	No	Yes	0	Dead	39	Breast	Dead (attributable to this cancer dx)	Alive or dead due to cancer
62	White	White	Female	8500	Moderately differentiated; Grade II	HR+/HER2+ (Luminal B)	Positive	Positive	Positive	T2	N1	M1	IV	Married (including common law)	Any Medicaid	No	No	No	0	Alive	47	Alive	Alive or dead of other cause	Alive or dead due to cancer
44	White	White	Female	8500	Moderately differentiated; Grade II	HR+/HER2- (Luminal A)	Positive	Positive	Negative	T4b	N2NOS	M1	IV	Married (including common law)	Insured	No	No	No	0	Alive	35	Alive	Alive or dead of other cause	Alive or dead due to cancer
53	White	White	Female	8500	Poorly differentiated; Grade III	HR+/HER2- (Luminal A)	Positive	Positive	Negative	T2	N1mi	M1	IV	Single (never married)	Any Medicaid	No	No	No	41	Dead	31	Breast	Dead (attributable to this cancer dx)	Alive or dead due to cancer
71	White	White	Female	8500	Poorly differentiated; Grade III	HR+/HER2- (Luminal A)	Positive	Negative	Negative	T1c	N1	M1	IV	Married (including common law)	Insured	No	Yes	No	22	Dead	4	Breast	Dead (attributable to this cancer dx)	Alive or dead due to cancer
51	Black	Black	Female	8500	Moderately differentiated; Grade II	HR+/HER2- (Luminal A)	Positive	Positive	Negative	T4d	N1	M1	IV	Divorced	Insured	No	No	No	0	Alive	41	Alive	Alive or dead of other cause	Alive or dead due to cancer
55	White	White	Female	8500	Poorly differentiated; Grade III	HR+/HER2+ (Luminal B)	Positive	Negative	Positive	T2	N3b	M1	IV	Married (including common law)	Insured	No	No	No	22	Alive	37	Alive	Alive or dead of other cause	Alive or dead due to cancer
54	White	White	Female	8500	Moderately differentiated; Grade II	HR+/HER2- (Luminal A)	Positive	Positive	Negative	T4a	N1	M1	IV	Divorced	Uninsured	No	No	No	0	Alive	37	Alive	Alive or dead of other cause	Alive or dead due to cancer
63	White	White	Female	8500	Moderately differentiated; Grade II	HR+/HER2- (Luminal A)	Positive	Positive	Negative	T4a	N1	M1	IV	Married (including common law)	Insured	No	No	No	0	Alive	46	Alive	Alive or dead of other cause	Alive or dead due to cancer
50	White	White	Female	8500	Moderately differentiated; Grade II	HR+/HER2+ (Luminal B)	Positive	Positive	Positive	T2	N1	M1	IV	Single (never married)	Insured	No	No	Yes	0	Alive	44	Alive	Alive or dead of other cause	Alive or dead due to cancer
42	White	White	Female	8500	Unknown	HR+/HER2- (Luminal A)	Positive	Positive	Negative	T4d	N3c	M1	IV	Divorced	Uninsured	No	Yes	Yes	0	Dead	8	Breast	Dead (attributable to this cancer dx)	Alive or dead due to cancer
70	White	White	Female	8500	Poorly differentiated; Grade III	HR+/HER2+ (Luminal B)	Positive	Negative	Positive	T2	N2a	M1	IV	Married (including common law)	Insured	No	Yes	No	52	Dead	27	Breast	Dead (attributable to this cancer dx)	Alive or dead due to cancer
55	White	White	Female	8520	Poorly differentiated; Grade III	HR+/HER2- (Luminal A)	Positive	Positive	Negative	T4b	N1	M1	IV	Married (including common law)	Insured	No	No	No	0	Alive	37	Alive	Alive or dead of other cause	Alive or dead due to cancer
43	White	White	Female	8500	Poorly differentiated; Grade III	HR-/HER2+ (HER2 enriched)	Negative	Negative	Positive	T4d	N1	M1	IV	Divorced	Insurance status unknown	No	No	No	0	Alive	39	Alive	Alive or dead of other cause	Alive or dead due to cancer
77	White	White	Female	8500	Poorly differentiated; Grade III	HR+/HER2+ (Luminal B)	Positive	Negative	Positive	T4b	N0	M1	IV	Widowed	Insured/No specifics	No	No	No	0	Dead	1	Diseases of Heart	Alive or dead of other cause	Dead (attributable to causes other than this cancer dx)
55	White	White	Female	8500	Moderately differentiated; Grade II	HR+/HER2+ (Luminal B)	Positive	Positive	Positive	T2	N1	M1	IV	Married (including common law)	Insured/No specifics	No	No	No	0	Alive	44	Alive	Alive or dead of other cause	Alive or dead due to cancer
57	White	White	Female	8500	Poorly differentiated; Grade III	HR-/HER2- (Triple Negative)	Negative	Negative	Negative	T2	N1	M1	IV	Married (including common law)	Insured	No	No	No	52	Dead	29	Breast	Dead (attributable to this cancer dx)	Alive or dead due to cancer
33	White	White	Female	8500	Moderately differentiated; Grade II	HR+/HER2- (Luminal A)	Positive	Positive	Negative	T2	N0	M1	IV	Married (including common law)	Insured	No	No	No	0	Dead	9	Breast	Dead (attributable to this cancer dx)	Alive or dead due to cancer
59	White	White	Female	8500	Unknown	HR+/HER2- (Luminal A)	Positive	Positive	Negative	T4b	N1	M1	IV	Married (including common law)	Insured	No	No	No	0	Alive	39	Alive	Alive or dead of other cause	Alive or dead due to cancer
49	White	White	Female	8500	Moderately differentiated; Grade II	HR+/HER2- (Luminal A)	Positive	Positive	Negative	T4b	N0	M1	IV	Widowed	Insured	No	No	No	0	Alive	38	Alive	Alive or dead of other cause	Alive or dead due to cancer
74	White	White	Female	8500	Poorly differentiated; Grade III	HR-/HER2+ (HER2 enriched)	Negative	Negative	Positive	T4d	N0	M1	IV	Widowed	Insured	No	No	No	0	Dead	1	Breast	Dead (attributable to this cancer dx)	Alive or dead due to cancer
51	White	White	Female	8500	Poorly differentiated; Grade III	HR-/HER2- (Triple Negative)	Negative	Negative	Negative	T2	N3b	M1	IV	Married (including common law)	Insured	No	Yes	No	49	Dead	38	Breast	Dead (attributable to this cancer dx)	Alive or dead due to cancer
63	White	White	Female	8500	Moderately differentiated; Grade II	HR+/HER2- (Luminal A)	Positive	Positive	Negative	T3	N1	M1	IV	Married (including common law)	Insured	No	No	No	55	Alive	39	Alive	Alive or dead of other cause	Alive or dead due to cancer
59	White	White	Female	8500	Moderately differentiated; Grade II	HR-/HER2- (Triple Negative)	Negative	Negative	Negative	T2	N1	M1	IV	Widowed	Any Medicaid	No	No	Yes	0	Dead	20	Breast	Dead (attributable to this cancer dx)	Alive or dead due to cancer
39	White	White	Female	8500	Poorly differentiated; Grade III	HR+/HER2- (Luminal A)	Positive	Positive	Negative	T4d	N1	M1	IV	Unknown	Any Medicaid	No	No	No	0	Dead	20	Breast	Dead (attributable to this cancer dx)	Alive or dead due to cancer
34	White	White	Female	8500	Poorly differentiated; Grade III	HR+/HER2- (Luminal A)	Positive	Negative	Negative	T2	N3a	M1	IV	Married (including common law)	Insured	No	No	No	0	Dead	29	Breast	Dead (attributable to this cancer dx)	Alive or dead due to cancer
45	White	White	Female	8500	Unknown	HR+/HER2+ (Luminal B)	Positive	Positive	Positive	T4b	N2NOS	M1	IV	Divorced	Insured	No	Yes	Yes	0	Dead	38	Breast	Dead (attributable to this cancer dx)	Alive or dead due to cancer
77	White	White	Female	8500	Poorly differentiated; Grade III	HR+/HER2- (Luminal A)	Positive	Positive	Negative	T1c	N1a	M1	IV	Married (including common law)	Insured	No	No	No	51	Alive	31	Alive	Alive or dead of other cause	Alive or dead due to cancer
32	White	White	Female	8500	Poorly differentiated; Grade III	HR-/HER2- (Triple Negative)	Negative	Negative	Negative	T4a	N3c	M1	IV	Single (never married)	Insured	No	No	Yes	0	Dead	20	Breast	Dead (attributable to this cancer dx)	Alive or dead due to cancer
80	White	White	Female	8010	Poorly differentiated; Grade III	HR-/HER2- (Triple Negative)	Negative	Negative	Negative	T2	N0	M1	IV	Divorced	Any Medicaid	No	No	Yes	0	Dead	1	Breast	Dead (attributable to this cancer dx)	Alive or dead due to cancer
45	White	White	Female	8500	Moderately differentiated; Grade II	HR+/HER2- (Luminal A)	Positive	Positive	Negative	T2	N2a	M1	IV	Married (including common law)	Insured	No	No	No	52	Alive	33	Alive	Alive or dead of other cause	Alive or dead due to cancer
49	White	White	Female	8500	Moderately differentiated; Grade II	HR+/HER2+ (Luminal B)	Positive	Negative	Positive	T1c	N1	M1	IV	Single (never married)	Insured/No specifics	No	Yes	Yes	22	Dead	2	Breast	Dead (attributable to this cancer dx)	Alive or dead due to cancer
37	White	White	Female	8500	Poorly differentiated; Grade III	HR+/HER2- (Luminal A)	Positive	Positive	Negative	T1b	N3b	M1	IV	Single (never married)	Insured	No	No	No	52	Alive	33	Alive	Alive or dead of other cause	Alive or dead due to cancer
65	White	White	Female	8500	Moderately differentiated; Grade II	HR+/HER2- (Luminal A)	Positive	Positive	Negative	T3	N0	M1	IV	Widowed	Any Medicaid	No	No	No	0	Dead	29	Other Cause of Death	Alive or dead of other cause	Dead (attributable to causes other than this cancer dx)
58	White	White	Female	8520	Unknown	HR+/HER2- (Luminal A)	Positive	Positive	Negative	T2	N3c	M1	IV	Married (including common law)	Insured	No	No	No	0	Dead	15	Breast	Dead (attributable to this cancer dx)	Alive or dead due to cancer
46	White	White	Female	8522	Poorly differentiated; Grade III	HR-/HER2- (Triple Negative)	Negative	Negative	Negative	T2	N0	M1	IV	Married (including common law)	Insured	Yes	No	No	0	Dead	1	Breast	Dead (attributable to this cancer dx)	Alive or dead due to cancer
77	White	White	Female	8500	Poorly differentiated; Grade III	HR+/HER2- (Luminal A)	Positive	Positive	Negative	T2	N3a	M1	IV	Married (including common law)	Insured	No	No	No	51	Alive	39	Alive	Alive or dead of other cause	Alive or dead due to cancer
79	White	White	Female	8500	Poorly differentiated; Grade III	HR-/HER2- (Triple Negative)	Negative	Negative	Negative	T4b	N1	M1	IV	Widowed	Uninsured	No	Yes	No	0	Dead	6	Breast	Dead (attributable to this cancer dx)	Alive or dead due to cancer
51	White	White	Female	8522	Moderately differentiated; Grade II	HR-/HER2+ (HER2 enriched)	Negative	Negative	Positive	T4b	N1	M1	IV	Married (including common law)	Insured/No specifics	No	Yes	No	41	Dead	22	Breast	Dead (attributable to this cancer dx)	Alive or dead due to cancer
58	White	White	Female	8500	Poorly differentiated; Grade III	HR-/HER2- (Triple Negative)	Negative	Negative	Negative	T2	N1a	M1	IV	Married (including common law)	Insured	Yes	No	Yes	52	Dead	5	Breast	Dead (attributable to this cancer dx)	Alive or dead due to cancer
62	White	White	Female	8523	Poorly differentiated; Grade III	HR+/HER2- (Luminal A)	Positive	Positive	Negative	T2	N0	M1	IV	Married (including common law)	Insured	No	No	No	0	Dead	24	Breast	Dead (attributable to this cancer dx)	Alive or dead due to cancer
62	White	White	Female	8500	Poorly differentiated; Grade III	HR+/HER2- (Luminal A)	Positive	Negative	Negative	T4b	N3c	M1	IV	Widowed	Insured	No	No	No	0	Dead	3	Breast	Dead (attributable to this cancer dx)	Alive or dead due to cancer
65	White	White	Female	8520	Poorly differentiated; Grade III	HR+/HER2- (Luminal A)	Positive	Negative	Negative	T3	N1	M1	IV	Married (including common law)	Insured	No	No	No	52	Alive	28	Alive	Alive or dead of other cause	Alive or dead due to cancer
43	White	White	Female	8520	Moderately differentiated; Grade II	HR+/HER2- (Luminal A)	Positive	Positive	Negative	T2	N0	M1	IV	Divorced	Any Medicaid	No	No	No	40	Alive	47	Alive	Alive or dead of other cause	Alive or dead due to cancer
34	White	White	Female	8500	Moderately differentiated; Grade II	HR+/HER2- (Luminal A)	Positive	Positive	Negative	T1c	N1	M1	IV	Divorced	Any Medicaid	No	No	Yes	0	Alive	27	Alive	Alive or dead of other cause	Alive or dead due to cancer
62	White	White	Female	8500	Poorly differentiated; Grade III	HR+/HER2- (Luminal A)	Positive	Positive	Negative	T4d	N1	M1	IV	Married (including common law)	Insured	No	No	Yes	0	Dead	8	Breast	Dead (attributable to this cancer dx)	Alive or dead due to cancer
51	White	White	Female	8500	Poorly differentiated; Grade III	HR-/HER2+ (HER2 enriched)	Negative	Negative	Positive	T4d	N1	M1	IV	Unknown	Insured/No specifics	No	No	No	51	Alive	30	Alive	Alive or dead of other cause	Alive or dead due to cancer
72	White	White	Female	8500	Poorly differentiated; Grade III	HR-/HER2- (Triple Negative)	Negative	Negative	Negative	T4b	N1	M1	IV	Married (including common law)	Insured	No	No	No	41	Dead	23	Breast	Dead (attributable to this cancer dx)	Alive or dead due to cancer
37	White	White	Female	8500	Poorly differentiated; Grade III	HR+/HER2- (Luminal A)	Positive	Positive	Negative	T2	N1	M1	IV	Married (including common law)	Insured/No specifics	No	Yes	No	0	Dead	30	Breast	Dead (attributable to this cancer dx)	Alive or dead due to cancer
80	White	White	Female	8520	Poorly differentiated; Grade III	HR+/HER2+ (Luminal B)	Positive	Positive	Positive	T3	N0	M1	IV	Divorced	Insured	No	No	No	0	Dead	5	Breast	Dead (attributable to this cancer dx)	Alive or dead due to cancer
58	White	White	Female	8500	Moderately differentiated; Grade II	HR+/HER2- (Luminal A)	Positive	Positive	Negative	T4b	N1	M1	IV	Single (never married)	Insured	No	No	Yes	51	Alive	35	Alive	Alive or dead of other cause	Alive or dead due to cancer
62	White	White	Female	8500	Poorly differentiated; Grade III	HR-/HER2- (Triple Negative)	Negative	Negative	Negative	T4b	N1	M1	IV	Married (including common law)	Insured	No	No	No	0	Alive	34	Alive	Alive or dead of other cause	Alive or dead due to cancer
41	White	White	Female	8500	Poorly differentiated; Grade III	HR+/HER2- (Luminal A)	Positive	Positive	Negative	T2	N0	M1	IV	Divorced	Any Medicaid	No	No	No	22	Alive	31	Alive	Alive or dead of other cause	Alive or dead due to cancer
88	White	White	Female	8500	Well differentiated; Grade I	HR+/HER2+ (Luminal B)	Positive	Positive	Positive	T2	N1	M1	IV	Widowed	Insured	No	Yes	Yes	0	Dead	3	Breast	Dead (attributable to this cancer dx)	Alive or dead due to cancer
93	White	White	Female	8500	Poorly differentiated; Grade III	HR+/HER2- (Luminal A)	Positive	Positive	Negative	T4b	N2a	M1	IV	Unknown	Insured	No	No	No	41	Dead	5	Breast	Dead (attributable to this cancer dx)	Alive or dead due to cancer
60	White	White	Female	8500	Poorly differentiated; Grade III	HR+/HER2+ (Luminal B)	Positive	Positive	Positive	T2	N1	M1	IV	Widowed	Insured	Yes	No	Yes	0	Dead	19	Breast	Dead (attributable to this cancer dx)	Alive or dead due to cancer
69	White	White	Female	8500	Moderately differentiated; Grade II	HR+/HER2- (Luminal A)	Positive	Positive	Negative	T4b	N2a	M1	IV	Single (never married)	Insured	No	No	No	22	Alive	26	Alive	Alive or dead of other cause	Alive or dead due to cancer
76	White	White	Female	8500	Moderately differentiated; Grade II	HR+/HER2- (Luminal A)	Positive	Positive	Negative	T3	N1	M1	IV	Divorced	Insured	No	No	Yes	0	Dead	1	Breast	Dead (attributable to this cancer dx)	Alive or dead due to cancer
61	White	White	Female	8480	Moderately differentiated; Grade II	HR+/HER2+ (Luminal B)	Positive	Positive	Positive	T3	N1a	M1	IV	Single (never married)	Insured	No	No	Yes	51	Alive	30	Alive	Alive or dead of other cause	Alive or dead due to cancer
53	White	White	Female	8500	Poorly differentiated; Grade III	HR-/HER2- (Triple Negative)	Negative	Negative	Negative	T1c	N1	M1	IV	Married (including common law)	Insured	Yes	No	No	0	Alive	22	Alive	Alive or dead of other cause	Alive or dead due to cancer
30	White	White	Female	8500	Poorly differentiated; Grade III	HR-/HER2+ (HER2 enriched)	Negative	Negative	Positive	T1c	N3c	M1	IV	Married (including common law)	Insured	No	Yes	Yes	0	Dead	22	Breast	Dead (attributable to this cancer dx)	Alive or dead due to cancer
81	White	White	Female	8520	Moderately differentiated; Grade II	HR+/HER2- (Luminal A)	Positive	Positive	Negative	T2	N1	M1	IV	Married (including common law)	Insured	No	No	No	0	Dead	3	Breast	Dead (attributable to this cancer dx)	Alive or dead due to cancer
61	White	White	Female	8500	Poorly differentiated; Grade III	HR-/HER2- (Triple Negative)	Negative	Negative	Negative	T2	N0	M1	IV	Single (never married)	Insured/No specifics	Yes	Yes	No	0	Dead	13	Breast	Dead (attributable to this cancer dx)	Alive or dead due to cancer
62	White	White	Female	8500	Poorly differentiated; Grade III	HR-/HER2+ (HER2 enriched)	Negative	Negative	Positive	T3	N1	M1	IV	Married (including common law)	Insured	No	Yes	No	51	Alive	31	Alive	Alive or dead of other cause	Alive or dead due to cancer
35	White	White	Female	8500	Poorly differentiated; Grade III	HR+/HER2+ (Luminal B)	Positive	Positive	Positive	T4d	N1mi	M1	IV	Married (including common law)	Insured	No	No	No	30	Alive	23	Alive	Alive or dead of other cause	Alive or dead due to cancer
66	White	White	Female	8500	Unknown	HR+/HER2- (Luminal A)	Positive	Positive	Negative	T1c	N3c	M1	IV	Married (including common law)	Insured	No	Yes	No	0	Alive	27	Alive	Alive or dead of other cause	Alive or dead due to cancer
68	White	White	Female	8500	Poorly differentiated; Grade III	HR+/HER2- (Luminal A)	Positive	Positive	Negative	T1c	N2a	M1	IV	Married (including common law)	Insured	No	No	No	22	Alive	34	Alive	Alive or dead of other cause	Alive or dead due to cancer
68	White	White	Female	8520	Well differentiated; Grade I	HR+/HER2- (Luminal A)	Positive	Positive	Negative	T3	N2a	M1	IV	Married (including common law)	Insured	No	No	No	51	Dead	16	Other Cause of Death	Alive or dead of other cause	Dead (attributable to causes other than this cancer dx)
58	White	White	Female	8500	Poorly differentiated; Grade III	HR+/HER2- (Luminal A)	Positive	Positive	Negative	T4b	N3a	M1	IV	Single (never married)	Insured	Yes	No	Yes	51	Dead	15	Breast	Dead (attributable to this cancer dx)	Alive or dead due to cancer
34	White	White	Female	8500	Moderately differentiated; Grade II	HR+/HER2- (Luminal A)	Positive	Positive	Negative	T2	N0	M1	IV	Married (including common law)	Any Medicaid	No	No	No	0	Alive	19	Alive	Alive or dead of other cause	Alive or dead due to cancer
78	White	White	Female	8500	Well differentiated; Grade I	HR+/HER2- (Luminal A)	Positive	Positive	Negative	T2	N0	M1	IV	Widowed	Insured/No specifics	No	No	No	22	Dead	2	Diseases of Heart	Alive or dead of other cause	Dead (attributable to causes other than this cancer dx)
67	White	White	Male	8500	Moderately differentiated; Grade II	HR+/HER2+ (Luminal B)	Positive	Positive	Positive	T3	N1	M1	IV	Divorced	Insured	No	No	No	0	Dead	9	Breast	Dead (attributable to this cancer dx)	Alive or dead due to cancer
46	White	White	Male	8500	Moderately differentiated; Grade II	HR+/HER2- (Luminal A)	Positive	Positive	Negative	T1b	N2a	M1	IV	Married (including common law)	Insured	No	No	No	41	Alive	23	Alive	Alive or dead of other cause	Alive or dead due to cancer
64	White	White	Female	8500	Moderately differentiated; Grade II	HR+/HER2- (Luminal A)	Positive	Positive	Negative	T2	N0	M1	IV	Married (including common law)	Insured	No	No	No	0	Alive	25	Alive	Alive or dead of other cause	Alive or dead due to cancer
75	White	White	Female	8500	Moderately differentiated; Grade II	HR+/HER2- (Luminal A)	Positive	Positive	Negative	T4b	N2a	M1	IV	Married (including common law)	Insured	No	No	No	51	Alive	25	Alive	Alive or dead of other cause	Alive or dead due to cancer
76	White	White	Female	8140	Unknown	HR+/HER2- (Luminal A)	Positive	Positive	Negative	T2	N2a	M1	IV	Married (including common law)	Insured	No	No	No	0	Dead	1	Breast	Dead (attributable to this cancer dx)	Alive or dead due to cancer
60	White	White	Female	8500	Poorly differentiated; Grade III	HR-/HER2- (Triple Negative)	Negative	Negative	Negative	T2	N0	M1	IV	Married (including common law)	Insured	Yes	Yes	Yes	20	Dead	4	Breast	Dead (attributable to this cancer dx)	Alive or dead due to cancer
75	White	White	Female	8500	Moderately differentiated; Grade II	HR+/HER2+ (Luminal B)	Positive	Positive	Positive	T2	N0	M1	IV	Married (including common law)	Insured	No	No	No	0	Dead	17	Pneumonia and Influenza	Alive or dead of other cause	Dead (attributable to causes other than this cancer dx)
67	Black	Black	Female	8522	Well differentiated; Grade I	HR+/HER2- (Luminal A)	Positive	Positive	Negative	T2	N1	M1	IV	Single (never married)	Insured	No	No	No	0	Alive	16	Alive	Alive or dead of other cause	Alive or dead due to cancer
56	White	White	Female	8500	Poorly differentiated; Grade III	HR+/HER2+ (Luminal B)	Positive	Positive	Positive	T4b	N1	M1	IV	Married (including common law)	Insured	No	No	No	0	Alive	21	Alive	Alive or dead of other cause	Alive or dead due to cancer
51	White	White	Female	8500	Well differentiated; Grade I	HR+/HER2- (Luminal A)	Positive	Positive	Negative	T4a	N2a	M1	IV	Married (including common law)	Insured	No	No	No	0	Alive	16	Alive	Alive or dead of other cause	Alive or dead due to cancer
49	White	White	Female	8500	Moderately differentiated; Grade II	HR+/HER2- (Luminal A)	Positive	Positive	Negative	T2	N1	M1	IV	Married (including common law)	Insured	No	No	No	0	Alive	20	Alive	Alive or dead of other cause	Alive or dead due to cancer
36	White	White	Female	8500	Poorly differentiated; Grade III	HR+/HER2+ (Luminal B)	Positive	Positive	Positive	T2	N1	M1	IV	Single (never married)	Any Medicaid	No	No	Yes	0	Alive	16	Alive	Alive or dead of other cause	Alive or dead due to cancer
53	White	White	Female	8500	Moderately differentiated; Grade II	HR+/HER2- (Luminal A)	Positive	Positive	Negative	T2	N0	M1	IV	Married (including common law)	Insured	No	No	No	0	Alive	15	Alive	Alive or dead of other cause	Alive or dead due to cancer
69	White	White	Female	8500	Poorly differentiated; Grade III	HR+/HER2- (Luminal A)	Positive	Positive	Negative	T2	N1	M1	IV	Married (including common law)	Insured	No	Yes	No	0	Dead	8	Breast	Dead (attributable to this cancer dx)	Alive or dead due to cancer
57	White	White	Female	8500	Moderately differentiated; Grade II	HR+/HER2+ (Luminal B)	Positive	Negative	Positive	T4b	N3b	M1	IV	Married (including common law)	Insured	No	No	No	51	Alive	8	Alive	Alive or dead of other cause	Alive or dead due to cancer
73	White	White	Female	8500	Moderately differentiated; Grade II	HR+/HER2- (Luminal A)	Positive	Positive	Negative	T2	N0	M1	IV	Widowed	Insured	No	No	No	0	Alive	27	Alive	Alive or dead of other cause	Alive or dead due to cancer
79	White	White	Female	8500	Poorly differentiated; Grade III	HR+/HER2+ (Luminal B)	Positive	Positive	Positive	T2	N2a	M1	IV	Widowed	Insured	No	No	No	51	Alive	16	Alive	Alive or dead of other cause	Alive or dead due to cancer
68	White	White	Female	8500	Moderately differentiated; Grade II	HR+/HER2- (Luminal A)	Positive	Negative	Negative	T2	N0	M1	IV	Married (including common law)	Insured/No specifics	No	No	No	0	Alive	21	Alive	Alive or dead of other cause	Alive or dead due to cancer
64	White	White	Female	8500	Poorly differentiated; Grade III	HR+/HER2- (Luminal A)	Positive	Negative	Negative	T3	N3a	M1	IV	Married (including common law)	Insured	No	No	No	55	Alive	20	Alive	Alive or dead of other cause	Alive or dead due to cancer
64	White	White	Female	8500	Poorly differentiated; Grade III	HR-/HER2+ (HER2 enriched)	Negative	Negative	Positive	T2	N1	M1	IV	Married (including common law)	Insured	No	No	No	22	Alive	17	Alive	Alive or dead of other cause	Alive or dead due to cancer
53	White	White	Female	8522	Poorly differentiated; Grade III	HR+/HER2+ (Luminal B)	Positive	Negative	Positive	T3	N1	M1	IV	Married (including common law)	Insured	No	Yes	No	0	Alive	20	Alive	Alive or dead of other cause	Alive or dead due to cancer
59	White	White	Female	8520	Moderately differentiated; Grade II	HR+/HER2- (Luminal A)	Positive	Negative	Negative	T4a	N1	M1	IV	Divorced	Insured/No specifics	No	No	No	0	Alive	14	Alive	Alive or dead of other cause	Alive or dead due to cancer
79	White	White	Female	8500	Poorly differentiated; Grade III	HR+/HER2- (Luminal A)	Positive	Positive	Negative	T4b	N1	M1	IV	Married (including common law)	Insured	No	Yes	Yes	0	Dead	15	Breast	Dead (attributable to this cancer dx)	Alive or dead due to cancer
37	White	White	Female	8500	Poorly differentiated; Grade III	HR-/HER2- (Triple Negative)	Negative	Negative	Negative	T3	N3b	M1	IV	Unmarried or Domestic Partner	Insured/No specifics	No	Yes	No	0	Dead	13	Breast	Dead (attributable to this cancer dx)	Alive or dead due to cancer
76	White	White	Female	8500	Moderately differentiated; Grade II	HR-/HER2- (Triple Negative)	Negative	Negative	Negative	T4a	N2a	M1	IV	Divorced	Insured	No	Yes	No	51	Alive	17	Alive	Alive or dead of other cause	Alive or dead due to cancer
77	White	White	Female	8500	Moderately differentiated; Grade II	HR+/HER2+ (Luminal B)	Positive	Positive	Positive	T2	N1	M1	IV	Married (including common law)	Insured	No	No	No	0	Alive	16	Alive	Alive or dead of other cause	Alive or dead due to cancer
66	White	White	Female	8520	Moderately differentiated; Grade II	HR+/HER2- (Luminal A)	Positive	Positive	Negative	T3	N1	M1	IV	Widowed	Insured/No specifics	No	No	No	41	Alive	20	Alive	Alive or dead of other cause	Alive or dead due to cancer
70	White	White	Female	8500	Moderately differentiated; Grade II	HR+/HER2- (Luminal A)	Positive	Positive	Negative	T2	N0	M1	IV	Married (including common law)	Insured	No	No	No	0	Alive	9	Alive	Alive or dead of other cause	Alive or dead due to cancer
54	White	White	Female	8520	Moderately differentiated; Grade II	HR+/HER2- (Luminal A)	Positive	Positive	Negative	T2	N1	M1	IV	Married (including common law)	Insured	No	No	No	0	Dead	7	Breast	Dead (attributable to this cancer dx)	Alive or dead due to cancer
33	White	White	Female	8523	Moderately differentiated; Grade II	HR+/HER2- (Luminal A)	Positive	Positive	Negative	T3	N2a	M1	IV	Married (including common law)	Insured	No	No	No	30	Alive	13	Alive	Alive or dead of other cause	Alive or dead due to cancer
53	White	White	Female	8522	Unknown	HR+/HER2- (Luminal A)	Positive	Negative	Negative	T3	N3a	M1	IV	Divorced	Insured	No	No	No	51	Alive	22	Alive	Alive or dead of other cause	Alive or dead due to cancer
28	Black	Black	Female	8010	Poorly differentiated; Grade III	HR-/HER2- (Triple Negative)	Negative	Negative	Negative	T4b	N3c	M1	IV	Single (never married)	Any Medicaid	No	No	No	0	Dead	11	Breast	Dead (attributable to this cancer dx)	Alive or dead due to cancer
55	White	White	Female	8500	Poorly differentiated; Grade III	HR+/HER2+ (Luminal B)	Positive	Negative	Positive	T4a	N3b	M1	IV	Married (including common law)	Insured	No	Yes	Yes	0	Alive	22	Alive	Alive or dead of other cause	Alive or dead due to cancer
72	White	White	Female	8401	Moderately differentiated; Grade II	HR+/HER2- (Luminal A)	Positive	Positive	Negative	T2	N1	M1	IV	Married (including common law)	Insured	No	No	No	0	Alive	17	Alive	Alive or dead of other cause	Alive or dead due to cancer
34	White	White	Female	8500	Moderately differentiated; Grade II	HR+/HER2+ (Luminal B)	Positive	Positive	Positive	T4a	N0	M1	IV	Single (never married)	Insured	No	No	No	0	Alive	17	Alive	Alive or dead of other cause	Alive or dead due to cancer
54	White	White	Female	8500	Unknown	HR-/HER2+ (HER2 enriched)	Negative	Negative	Positive	T4d	N1	M1	IV	Married (including common law)	Insured	No	No	Yes	0	Alive	13	Alive	Alive or dead of other cause	Alive or dead due to cancer
48	White	White	Female	8520	Poorly differentiated; Grade III	HR+/HER2- (Luminal A)	Positive	Positive	Negative	T2	N1	M1	IV	Married (including common law)	Uninsured	No	No	No	0	Alive	7	Alive	Alive or dead of other cause	Alive or dead due to cancer
59	White	White	Female	8500	Poorly differentiated; Grade III	HR+/HER2- (Luminal A)	Positive	Positive	Negative	T3	N2a	M1	IV	Married (including common law)	Insured/No specifics	No	Yes	Yes	61	Alive	19	Alive	Alive or dead of other cause	Alive or dead due to cancer
56	Black	Black	Female	8500	Poorly differentiated; Grade III	HR+/HER2+ (Luminal B)	Positive	Negative	Positive	T4b	N3c	M1	IV	Divorced	Insured/No specifics	No	Yes	Yes	0	Alive	21	Alive	Alive or dead of other cause	Alive or dead due to cancer
69	White	White	Male	8500	Moderately differentiated; Grade II	HR+/HER2- (Luminal A)	Positive	Negative	Negative	T1c	N1	M1	IV	Divorced	Insured/No specifics	No	No	No	0	Alive	12	Alive	Alive or dead of other cause	Alive or dead due to cancer
54	White	White	Female	8500	Moderately differentiated; Grade II	HR-/HER2- (Triple Negative)	Negative	Negative	Negative	T4b	N0	M1	IV	Married (including common law)	Any Medicaid	No	Yes	No	0	Dead	14	Breast	Dead (attributable to this cancer dx)	Alive or dead due to cancer
53	White	White	Female	8500	Poorly differentiated; Grade III	HR-/HER2+ (HER2 enriched)	Negative	Negative	Positive	T3	N2a	M1	IV	Married (including common law)	Insured	No	Yes	No	0	Dead	6	Suicide and Self-Inflicted Injury	Alive or dead of other cause	Dead (attributable to causes other than this cancer dx)
62	White	White	Female	8500	Poorly differentiated; Grade III	HR+/HER2- (Luminal A)	Positive	Positive	Negative	T2	N2a	M1	IV	Married (including common law)	Insured	No	No	No	51	Alive	22	Alive	Alive or dead of other cause	Alive or dead due to cancer
72	White	White	Female	8520	Moderately differentiated; Grade II	HR+/HER2- (Luminal A)	Positive	Positive	Negative	T3	N0	M1	IV	Widowed	Any Medicaid	No	No	No	0	Dead	1	Breast	Dead (attributable to this cancer dx)	Alive or dead due to cancer
84	White	White	Female	8500	Poorly differentiated; Grade III	HR+/HER2- (Luminal A)	Positive	Positive	Negative	T3	N1	M1	IV	Widowed	Insured	No	No	Yes	0	Alive	20	Alive	Alive or dead of other cause	Alive or dead due to cancer
59	White	White	Female	8500	Poorly differentiated; Grade III	HR-/HER2- (Triple Negative)	Negative	Negative	Negative	T1b	N0	M1	IV	Widowed	Insured/No specifics	Yes	Yes	Yes	0	Dead	20	Breast	Dead (attributable to this cancer dx)	Alive or dead due to cancer
66	White	White	Female	8500	Poorly differentiated; Grade III	HR+/HER2+ (Luminal B)	Positive	Positive	Positive	T2	N1	M1	IV	Divorced	Insured	No	No	No	51	Alive	80	Alive	Alive or dead of other cause	Alive or dead due to cancer
73	White	White	Female	8500	Moderately differentiated; Grade II	HR+/HER2+ (Luminal B)	Positive	Positive	Positive	T2	N0	M1	IV	Married (including common law)	Insured/No specifics	No	No	No	0	Dead	9	Nephritis, Nephrotic Syndrome and Nephrosis	Alive or dead of other cause	Dead (attributable to causes other than this cancer dx)
52	White	White	Male	8500	Poorly differentiated; Grade III	HR-/HER2- (Triple Negative)	Negative	Negative	Negative	T2	N0	M1	IV	Married (including common law)	Insured	No	Yes	No	0	Dead	2	Breast	Dead (attributable to this cancer dx)	Alive or dead due to cancer
67	White	White	Female	8500	Moderately differentiated; Grade II	HR+/HER2- (Luminal A)	Positive	Positive	Negative	T3	N1	M1	IV	Married (including common law)	Insured	No	No	No	0	Dead	68	Breast	Dead (attributable to this cancer dx)	Alive or dead due to cancer
40	White	White	Female	8500	Poorly differentiated; Grade III	HR-/HER2+ (HER2 enriched)	Negative	Negative	Positive	T2	N0	M1	IV	Unknown	Insurance status unknown	No	No	No	0	Alive	80	Alive	Alive or dead of other cause	Alive or dead due to cancer
83	White	White	Female	8500	Poorly differentiated; Grade III	HR-/HER2- (Triple Negative)	Negative	Negative	Negative	T4b	N2a	M1	IV	Divorced	Insured	No	No	No	22	Dead	3	Breast	Dead (attributable to this cancer dx)	Alive or dead due to cancer
48	White	White	Female	8500	Poorly differentiated; Grade III	HR+/HER2+ (Luminal B)	Positive	Positive	Positive	T2	N0	M1	IV	Married (including common law)	Insured/No specifics	No	Yes	No	0	Dead	32	Breast	Dead (attributable to this cancer dx)	Alive or dead due to cancer
77	White	White	Female	8500	Moderately differentiated; Grade II	HR+/HER2- (Luminal A)	Positive	Negative	Negative	T4d	N2a	M1	IV	Widowed	Insured	No	No	No	51	Dead	5	Breast	Dead (attributable to this cancer dx)	Alive or dead due to cancer
37	White	White	Female	8520	Well differentiated; Grade I	HR+/HER2- (Luminal A)	Positive	Positive	Negative	T3	N0	M1	IV	Married (including common law)	Insured/No specifics	No	No	No	22	Dead	6	Breast	Dead (attributable to this cancer dx)	Alive or dead due to cancer
41	White	White	Female	8500	Poorly differentiated; Grade III	HR+/HER2- (Luminal A)	Positive	Negative	Negative	T4d	N3c	M1	IV	Unknown	Insured	No	Yes	Yes	0	Dead	40	Breast	Dead (attributable to this cancer dx)	Alive or dead due to cancer
43	White	White	Female	8500	Poorly differentiated; Grade III	HR+/HER2+ (Luminal B)	Positive	Positive	Positive	T3	N0	M1	IV	Single (never married)	Any Medicaid	No	No	Yes	0	Dead	61	Breast	Dead (attributable to this cancer dx)	Alive or dead due to cancer
48	Other (American Indian/AK Native, Asian/Pacific Islander)	American Indian/Alaska Native	Female	8500	Poorly differentiated; Grade III	HR-/HER2- (Triple Negative)	Negative	Negative	Negative	T2	N1a	M1	IV	Married (including common law)	Any Medicaid	No	No	No	51	Dead	59	Breast	Dead (attributable to this cancer dx)	Alive or dead due to cancer
60	White	White	Female	8522	Moderately differentiated; Grade II	HR-/HER2+ (HER2 enriched)	Negative	Negative	Positive	T2	N1	M1	IV	Married (including common law)	Insured/No specifics	No	No	No	0	Dead	49	Breast	Dead (attributable to this cancer dx)	Alive or dead due to cancer
54	White	White	Female	8500	Moderately differentiated; Grade II	HR+/HER2- (Luminal A)	Positive	Positive	Negative	T3	N2a	M1	IV	Single (never married)	Insured	No	No	No	52	Alive	66	Alive	Alive or dead of other cause	Alive or dead due to cancer
55	White	White	Female	8500	Unknown	HR+/HER2+ (Luminal B)	Positive	Positive	Positive	T2	N3c	M1	IV	Single (never married)	Any Medicaid	No	No	No	0	Dead	46	Breast	Dead (attributable to this cancer dx)	Alive or dead due to cancer
67	White	White	Female	8500	Poorly differentiated; Grade III	HR+/HER2+ (Luminal B)	Positive	Negative	Positive	T4a	N1	M1	IV	Widowed	Insured/No specifics	No	Yes	No	0	Dead	55	Breast	Dead (attributable to this cancer dx)	Alive or dead due to cancer
61	White	White	Female	8140	Unknown	HR+/HER2+ (Luminal B)	Negative	Positive	Positive	T4a	N1	M1	IV	Single (never married)	Any Medicaid	No	No	No	0	Dead	43	Breast	Dead (attributable to this cancer dx)	Alive or dead due to cancer
34	White	White	Female	8500	Poorly differentiated; Grade III	HR-/HER2- (Triple Negative)	Negative	Negative	Negative	T2	N3c	M1	IV	Unknown	Any Medicaid	No	No	No	0	Dead	21	Breast	Dead (attributable to this cancer dx)	Alive or dead due to cancer
73	White	White	Female	8500	Moderately differentiated; Grade II	HR-/HER2+ (HER2 enriched)	Negative	Negative	Positive	T3	N1	M1	IV	Married (including common law)	Insured	No	No	No	0	Dead	1	Breast	Dead (attributable to this cancer dx)	Alive or dead due to cancer
61	White	White	Female	8520	Poorly differentiated; Grade III	HR+/HER2- (Luminal A)	Positive	Positive	Negative	T4a	N0	M1	IV	Married (including common law)	Any Medicaid	No	No	Yes	0	Dead	36	Breast	Dead (attributable to this cancer dx)	Alive or dead due to cancer
62	White	White	Female	8522	Poorly differentiated; Grade III	HR+/HER2- (Luminal A)	Positive	Positive	Negative	T2	N1	M1	IV	Single (never married)	Insured	No	No	No	22	Dead	19	Breast	Dead (attributable to this cancer dx)	Alive or dead due to cancer
54	White	White	Female	8522	Moderately differentiated; Grade II	HR+/HER2- (Luminal A)	Positive	Positive	Negative	T2	N1NOS	M1	IV	Married (including common law)	Insured	No	No	No	23	Alive	66	Alive	Alive or dead of other cause	Alive or dead due to cancer
46	White	White	Female	8500	Moderately differentiated; Grade II	HR+/HER2+ (Luminal B)	Positive	Positive	Positive	T3	N3b	M1	IV	Married (including common law)	Insured	Yes	Yes	No	0	Dead	44	Breast	Dead (attributable to this cancer dx)	Alive or dead due to cancer
61	White	White	Female	8500	Poorly differentiated; Grade III	HR+/HER2+ (Luminal B)	Positive	Positive	Positive	T4b	N3c	M1	IV	Married (including common law)	Insured	No	No	No	0	Dead	2	Breast	Dead (attributable to this cancer dx)	Alive or dead due to cancer
57	White	White	Female	8500	Well differentiated; Grade I	HR+/HER2- (Luminal A)	Positive	Positive	Negative	T1c	N1a	M1	IV	Married (including common law)	Insured	No	No	No	22	Alive	63	Alive	Alive or dead of other cause	Alive or dead due to cancer
54	White	White	Female	8500	Unknown	HR+/HER2- (Luminal A)	Positive	Positive	Negative	T2	N2NOS	M1	IV	Married (including common law)	Insured/No specifics	No	No	No	0	Dead	24	Breast	Dead (attributable to this cancer dx)	Alive or dead due to cancer
46	White	White	Female	8520	Poorly differentiated; Grade III	HR+/HER2- (Luminal A)	Positive	Positive	Negative	T1c	N0	M1	IV	Married (including common law)	Insured	Yes	No	Yes	0	Dead	16	Breast	Dead (attributable to this cancer dx)	Alive or dead due to cancer
61	White	White	Female	8140	Unknown	HR+/HER2- (Luminal A)	Positive	Positive	Negative	T4b	N1	M1	IV	Widowed	Any Medicaid	No	No	No	0	Dead	7	Breast	Dead (attributable to this cancer dx)	Alive or dead due to cancer
75	White	White	Female	8500	Moderately differentiated; Grade II	HR+/HER2- (Luminal A)	Positive	Negative	Negative	T4b	N1	M1	IV	Divorced	Insured/No specifics	No	Yes	Yes	0	Dead	4	Breast	Dead (attributable to this cancer dx)	Alive or dead due to cancer
76	White	White	Female	8500	Moderately differentiated; Grade II	HR+/HER2- (Luminal A)	Positive	Positive	Negative	T1c	N0	M1	IV	Divorced	Insured	No	No	No	22	Alive	58	Alive	Alive or dead of other cause	Alive or dead due to cancer
56	White	White	Female	8500	Poorly differentiated; Grade III	HR+/HER2- (Luminal A)	Positive	Positive	Negative	T4c	N2a	M1	IV	Married (including common law)	Any Medicaid	No	No	No	0	Alive	55	Alive	Alive or dead of other cause	Alive or dead due to cancer
70	White	White	Female	8520	Moderately differentiated; Grade II	HR+/HER2- (Luminal A)	Positive	Positive	Negative	T2	N0	M1	IV	Married (including common law)	Insured	No	No	No	0	Dead	11	Breast	Dead (attributable to this cancer dx)	Alive or dead due to cancer
68	White	White	Female	8010	Unknown	HR-/HER2+ (HER2 enriched)	Negative	Negative	Positive	T4b	N3c	M1	IV	Married (including common law)	Insured	No	No	Yes	0	Dead	23	Breast	Dead (attributable to this cancer dx)	Alive or dead due to cancer
77	White	White	Female	8500	Moderately differentiated; Grade II	HR+/HER2- (Luminal A)	Positive	Positive	Negative	T2	N0	M1	IV	Married (including common law)	Insured/No specifics	No	Yes	Yes	0	Dead	32	Breast	Dead (attributable to this cancer dx)	Alive or dead due to cancer
59	White	White	Female	8500	Unknown	HR+/HER2- (Luminal A)	Positive	Positive	Negative	T4c	N3a	M1	IV	Divorced	Any Medicaid	No	Yes	Yes	0	Dead	41	Breast	Dead (attributable to this cancer dx)	Alive or dead due to cancer
58	Other (American Indian/AK Native, Asian/Pacific Islander)	American Indian/Alaska Native	Female	8520	Moderately differentiated; Grade II	HR-/HER2- (Triple Negative)	Negative	Negative	Negative	T3	N1NOS	M1	IV	Single (never married)	Any Medicaid	No	No	No	41	Alive	56	Alive	Alive or dead of other cause	Alive or dead due to cancer
60	White	White	Female	8500	Unknown	HR+/HER2- (Luminal A)	Positive	Positive	Negative	T1c	N1	M1	IV	Unknown	Insured	Yes	No	No	0	Dead	16	Breast	Dead (attributable to this cancer dx)	Alive or dead due to cancer
44	White	White	Female	8530	Poorly differentiated; Grade III	HR+/HER2+ (Luminal B)	Positive	Positive	Positive	T4d	N3a	M1	IV	Married (including common law)	Insured	No	No	No	51	Dead	61	Breast	Dead (attributable to this cancer dx)	Alive or dead due to cancer
66	White	White	Female	8500	Moderately differentiated; Grade II	HR+/HER2- (Luminal A)	Positive	Positive	Negative	T4b	N0	M1	IV	Single (never married)	Insured/No specifics	No	Yes	Yes	0	Dead	16	Breast	Dead (attributable to this cancer dx)	Alive or dead due to cancer
64	White	White	Female	8500	Poorly differentiated; Grade III	HR+/HER2- (Luminal A)	Positive	Positive	Negative	T2	N1	M1	IV	Married (including common law)	Any Medicaid	No	No	Yes	0	Dead	37	Breast	Dead (attributable to this cancer dx)	Alive or dead due to cancer
42	White	White	Female	8500	Moderately differentiated; Grade II	HR+/HER2- (Luminal A)	Positive	Positive	Negative	T2	N1	M1	IV	Single (never married)	Insured	No	No	Yes	0	Alive	64	Alive	Alive or dead of other cause	Alive or dead due to cancer
70	White	White	Female	8500	Moderately differentiated; Grade II	HR+/HER2+ (Luminal B)	Positive	Negative	Positive	T4b	N1	M1	IV	Single (never married)	Insured	No	Yes	No	0	Dead	3	Breast	Dead (attributable to this cancer dx)	Alive or dead due to cancer
61	White	White	Female	8010	Unknown	HR-/HER2- (Triple Negative)	Negative	Negative	Negative	T2	N3b	M1	IV	Divorced	Any Medicaid	No	No	Yes	0	Dead	5	Breast	Dead (attributable to this cancer dx)	Alive or dead due to cancer
46	Other (American Indian/AK Native, Asian/Pacific Islander)	American Indian/Alaska Native	Female	8522	Moderately differentiated; Grade II	HR+/HER2- (Luminal A)	Positive	Positive	Negative	T3	N1	M1	IV	Married (including common law)	Any Medicaid	No	No	No	0	Alive	59	Alive	Alive or dead of other cause	Alive or dead due to cancer
49	White	White	Female	8500	Poorly differentiated; Grade III	HR-/HER2- (Triple Negative)	Negative	Negative	Negative	T2	N1a	M1	IV	Married (including common law)	Insured/No specifics	No	No	No	52	Alive	49	Alive	Alive or dead of other cause	Alive or dead due to cancer
48	White	White	Female	8500	Unknown	HR+/HER2- (Luminal A)	Positive	Positive	Negative	T4b	N1	M1	IV	Divorced	Insured	No	Yes	Yes	0	Dead	5	Breast	Dead (attributable to this cancer dx)	Alive or dead due to cancer
85	White	White	Female	8500	Moderately differentiated; Grade II	HR+/HER2- (Luminal A)	Positive	Positive	Negative	T1c	N1	M1	IV	Unknown	Insured/No specifics	No	No	No	0	Dead	26	Breast	Dead (attributable to this cancer dx)	Alive or dead due to cancer
75	White	White	Female	8500	Well differentiated; Grade I	HR+/HER2- (Luminal A)	Positive	Negative	Negative	T2	N0	M1	IV	Divorced	Insured	No	No	No	0	Alive	50	Alive	Alive or dead of other cause	Alive or dead due to cancer
51	White	White	Female	8500	Moderately differentiated; Grade II	HR+/HER2+ (Luminal B)	Negative	Positive	Positive	T4d	N2a	M1	IV	Single (never married)	Insured	No	Yes	Yes	0	Dead	1	Breast	Dead (attributable to this cancer dx)	Alive or dead due to cancer
46	White	White	Female	8500	Unknown	HR+/HER2- (Luminal A)	Positive	Positive	Negative	T2	N1	M1	IV	Married (including common law)	Any Medicaid	No	No	No	0	Dead	35	Breast	Dead (attributable to this cancer dx)	Alive or dead due to cancer
60	White	White	Female	8522	Moderately differentiated; Grade II	HR+/HER2+ (Luminal B)	Positive	Positive	Positive	T4d	N0	M1	IV	Unknown	Insurance status unknown	Yes	No	No	0	Alive	54	Alive	Alive or dead of other cause	Alive or dead due to cancer
58	White	White	Female	8500	Poorly differentiated; Grade III	HR-/HER2- (Triple Negative)	Negative	Negative	Negative	T2	N2a	M1	IV	Single (never married)	Any Medicaid	No	No	No	0	Dead	3	Breast	Dead (attributable to this cancer dx)	Alive or dead due to cancer
86	Other (American Indian/AK Native, Asian/Pacific Islander)	Asian or Pacific Islander	Female	8500	Poorly differentiated; Grade III	HR+/HER2+ (Luminal B)	Positive	Positive	Positive	T2	N1	M1	IV	Widowed	Insured	No	Yes	No	0	Dead	4	Breast	Dead (attributable to this cancer dx)	Alive or dead due to cancer
91	White	White	Female	8530	Moderately differentiated; Grade II	HR+/HER2+ (Luminal B)	Positive	Positive	Positive	T4d	N1	M1	IV	Widowed	Insured	No	No	No	0	Dead	2	Breast	Dead (attributable to this cancer dx)	Alive or dead due to cancer
56	White	White	Female	8500	Moderately differentiated; Grade II	HR+/HER2- (Luminal A)	Positive	Positive	Negative	T2	N0	M1	IV	Married (including common law)	Any Medicaid	No	No	Yes	22	Dead	24	Breast	Dead (attributable to this cancer dx)	Alive or dead due to cancer
57	White	White	Female	8500	Unknown	HR+/HER2+ (Luminal B)	Positive	Positive	Positive	T1c	N2a	M1	IV	Divorced	Any Medicaid	No	No	No	41	Alive	45	Alive	Alive or dead of other cause	Alive or dead due to cancer
65	White	White	Female	8500	Moderately differentiated; Grade II	HR+/HER2- (Luminal A)	Positive	Positive	Negative	T4b	N2NOS	M1	IV	Married (including common law)	Insured/No specifics	Yes	Yes	No	0	Dead	6	Breast	Dead (attributable to this cancer dx)	Alive or dead due to cancer
50	White	White	Female	8500	Poorly differentiated; Grade III	HR+/HER2- (Luminal A)	Negative	Positive	Negative	T1c	N3c	M1	IV	Divorced	Insured	Yes	No	Yes	0	Dead	1	Breast	Dead (attributable to this cancer dx)	Alive or dead due to cancer
66	White	White	Female	8500	Moderately differentiated; Grade II	HR-/HER2- (Triple Negative)	Negative	Negative	Negative	T4d	N1	M1	IV	Married (including common law)	Insured	No	Yes	No	0	Dead	5	Breast	Dead (attributable to this cancer dx)	Alive or dead due to cancer
53	White	White	Female	8500	Moderately differentiated; Grade II	HR+/HER2+ (Luminal B)	Positive	Positive	Positive	T2	N0	M1	IV	Single (never married)	Any Medicaid	No	No	No	0	Alive	39	Alive	Alive or dead of other cause	Alive or dead due to cancer
39	White	White	Female	8500	Well differentiated; Grade I	HR+/HER2- (Luminal A)	Positive	Positive	Negative	T2	N2a	M1	IV	Single (never married)	Any Medicaid	No	Yes	No	0	Dead	12	Breast	Dead (attributable to this cancer dx)	Alive or dead due to cancer
70	White	White	Female	8500	Moderately differentiated; Grade II	HR+/HER2- (Luminal A)	Positive	Positive	Negative	T4b	N1	M1	IV	Married (including common law)	Insured	No	Yes	Yes	0	Dead	2	Breast	Dead (attributable to this cancer dx)	Alive or dead due to cancer
60	White	White	Female	8500	Moderately differentiated; Grade II	HR+/HER2- (Luminal A)	Positive	Positive	Negative	T1c	N3a	M1	IV	Divorced	Any Medicaid	No	No	Yes	51	Alive	53	Alive	Alive or dead of other cause	Alive or dead due to cancer
69	White	White	Female	8522	Well differentiated; Grade I	HR+/HER2- (Luminal A)	Positive	Positive	Negative	T2	N0	M1	IV	Married (including common law)	Insured	No	No	No	0	Alive	37	Alive	Alive or dead of other cause	Alive or dead due to cancer
54	White	White	Female	8140	Moderately differentiated; Grade II	HR+/HER2- (Luminal A)	Positive	Positive	Negative	T3	N2NOS	M1	IV	Married (including common law)	Any Medicaid	No	No	Yes	0	Alive	46	Alive	Alive or dead of other cause	Alive or dead due to cancer
41	White	White	Female	8522	Moderately differentiated; Grade II	HR+/HER2- (Luminal A)	Positive	Positive	Negative	T3	N1	M1	IV	Divorced	Any Medicaid	No	No	No	0	Dead	20	Breast	Dead (attributable to this cancer dx)	Alive or dead due to cancer
61	Other (American Indian/AK Native, Asian/Pacific Islander)	American Indian/Alaska Native	Female	8500	Moderately differentiated; Grade II	HR+/HER2- (Luminal A)	Positive	Positive	Negative	T4b	N2NOS	M1	IV	Single (never married)	Any Medicaid	No	No	Yes	0	Dead	15	Breast	Dead (attributable to this cancer dx)	Alive or dead due to cancer
58	Other (American Indian/AK Native, Asian/Pacific Islander)	Asian or Pacific Islander	Female	8500	Moderately differentiated; Grade II	HR+/HER2- (Luminal A)	Positive	Positive	Negative	T1c	N0	M1	IV	Single (never married)	Insured	No	No	No	22	Alive	37	Alive	Alive or dead of other cause	Alive or dead due to cancer
82	White	White	Female	8500	Poorly differentiated; Grade III	HR+/HER2- (Luminal A)	Positive	Positive	Negative	T4b	N1	M1	IV	Single (never married)	Insured	No	Yes	Yes	0	Dead	7	Breast	Dead (attributable to this cancer dx)	Alive or dead due to cancer
86	White	White	Female	8500	Moderately differentiated; Grade II	HR+/HER2- (Luminal A)	Positive	Positive	Negative	T1c	N0	M1	IV	Widowed	Insured	No	No	No	0	Dead	6	Breast	Dead (attributable to this cancer dx)	Alive or dead due to cancer
55	White	White	Female	8500	Moderately differentiated; Grade II	HR+/HER2- (Luminal A)	Positive	Positive	Negative	T4b	N1	M1	IV	Divorced	Insured/No specifics	No	Yes	No	0	Dead	39	Breast	Dead (attributable to this cancer dx)	Alive or dead due to cancer
34	White	White	Female	8500	Poorly differentiated; Grade III	HR+/HER2- (Luminal A)	Negative	Positive	Negative	T4d	N1	M1	IV	Divorced	Any Medicaid	No	No	No	0	Dead	9	Breast	Dead (attributable to this cancer dx)	Alive or dead due to cancer
52	White	White	Female	8500	Poorly differentiated; Grade III	HR+/HER2- (Luminal A)	Positive	Positive	Negative	T2	N1	M1	IV	Married (including common law)	Insured	No	No	No	30	Dead	11	Breast	Dead (attributable to this cancer dx)	Alive or dead due to cancer
37	White	White	Female	8500	Poorly differentiated; Grade III	HR+/HER2+ (Luminal B)	Positive	Positive	Positive	T2	N0	M1	IV	Single (never married)	Insured	No	No	No	24	Alive	47	Alive	Alive or dead of other cause	Alive or dead due to cancer
53	White	White	Female	8500	Poorly differentiated; Grade III	HR+/HER2+ (Luminal B)	Positive	Positive	Positive	T1c	N1	M1	IV	Single (never married)	Any Medicaid	Yes	Yes	Yes	0	Alive	40	Alive	Alive or dead of other cause	Alive or dead due to cancer
72	White	White	Female	8520	Well differentiated; Grade I	HR+/HER2- (Luminal A)	Positive	Positive	Negative	T2	N2a	M1	IV	Married (including common law)	Insured	No	No	No	41	Alive	38	Alive	Alive or dead of other cause	Alive or dead due to cancer
65	White	White	Female	8500	Poorly differentiated; Grade III	HR-/HER2+ (HER2 enriched)	Negative	Negative	Positive	T4b	N1	M1	IV	Married (including common law)	Insured/No specifics	No	No	No	0	Alive	22	Alive	Alive or dead of other cause	Alive or dead due to cancer
86	White	White	Female	8500	Poorly differentiated; Grade III	HR+/HER2+ (Luminal B)	Positive	Negative	Positive	T3	N1	M1	IV	Unknown	Any Medicaid	No	No	No	51	Dead	14	Breast	Dead (attributable to this cancer dx)	Alive or dead due to cancer
43	White	White	Female	8500	Moderately differentiated; Grade II	HR+/HER2- (Luminal A)	Positive	Positive	Negative	T3	N1	M1	IV	Single (never married)	Insured	No	No	No	0	Dead	30	Breast	Dead (attributable to this cancer dx)	Alive or dead due to cancer
64	White	White	Female	8500	Poorly differentiated; Grade III	HR+/HER2- (Luminal A)	Positive	Positive	Negative	T4b	N1	M1	IV	Single (never married)	Any Medicaid	No	No	No	0	Dead	13	Breast	Dead (attributable to this cancer dx)	Alive or dead due to cancer
45	White	White	Female	8500	Moderately differentiated; Grade II	HR+/HER2+ (Luminal B)	Positive	Positive	Positive	T4b	N2a	M1	IV	Single (never married)	Insured	No	Yes	Yes	0	Alive	32	Alive	Alive or dead of other cause	Alive or dead due to cancer
55	White	White	Female	8500	Poorly differentiated; Grade III	HR+/HER2- (Luminal A)	Positive	Positive	Negative	T4b	N3a	M1	IV	Married (including common law)	Insured/No specifics	Yes	No	No	0	Dead	5	Breast	Dead (attributable to this cancer dx)	Alive or dead due to cancer
61	White	White	Female	8500	Poorly differentiated; Grade III	HR-/HER2- (Triple Negative)	Negative	Negative	Negative	T4b	N1	M1	IV	Widowed	Insured	No	Yes	No	0	Dead	22	Breast	Dead (attributable to this cancer dx)	Alive or dead due to cancer
65	White	White	Female	8500	Unknown	HR+/HER2+ (Luminal B)	Negative	Positive	Positive	T4d	N0	M1	IV	Married (including common law)	Insured/No specifics	Yes	Yes	No	0	Dead	15	Breast	Dead (attributable to this cancer dx)	Alive or dead due to cancer
44	White	White	Female	8500	Moderately differentiated; Grade II	HR+/HER2+ (Luminal B)	Positive	Positive	Positive	T1c	N2a	M1	IV	Single (never married)	Insured/No specifics	No	No	No	22	Alive	34	Alive	Alive or dead of other cause	Alive or dead due to cancer
78	White	White	Female	8500	Well differentiated; Grade I	HR+/HER2- (Luminal A)	Positive	Positive	Negative	T3	N1	M1	IV	Single (never married)	Insured	No	No	No	0	Alive	29	Alive	Alive or dead of other cause	Alive or dead due to cancer
72	White	White	Female	8530	Poorly differentiated; Grade III	HR+/HER2- (Luminal A)	Positive	Positive	Negative	T4d	N2a	M1	IV	Married (including common law)	Insured	No	No	Yes	0	Dead	18	Breast	Dead (attributable to this cancer dx)	Alive or dead due to cancer
71	White	White	Female	8140	Unknown	HR+/HER2- (Luminal A)	Positive	Positive	Negative	T2	N1	M1	IV	Single (never married)	Insured	No	No	Yes	0	Alive	25	Alive	Alive or dead of other cause	Alive or dead due to cancer
66	White	White	Female	8500	Moderately differentiated; Grade II	HR+/HER2- (Luminal A)	Positive	Positive	Negative	T4NOS	N3a	M1	IV	Married (including common law)	Insured/No specifics	No	Yes	Yes	0	Alive	51	Alive	Alive or dead of other cause	Alive or dead due to cancer
53	White	White	Female	8530	Unknown	HR+/HER2+ (Luminal B)	Positive	Negative	Positive	T4d	N1	M1	IV	Divorced	Any Medicaid	No	Yes	No	40	Dead	26	Septicemia	Alive or dead of other cause	Dead (attributable to causes other than this cancer dx)
51	White	White	Female	8520	Moderately differentiated; Grade II	HR+/HER2- (Luminal A)	Positive	Positive	Negative	T4a	N0	M1	IV	Single (never married)	Uninsured	No	No	No	0	Alive	34	Alive	Alive or dead of other cause	Alive or dead due to cancer
44	White	White	Female	8500	Poorly differentiated; Grade III	HR+/HER2- (Luminal A)	Positive	Positive	Negative	T1b	N0	M1	IV	Married (including common law)	Insured/No specifics	No	Yes	No	0	Alive	38	Alive	Alive or dead of other cause	Alive or dead due to cancer
56	White	White	Female	8500	Poorly differentiated; Grade III	HR+/HER2+ (Luminal B)	Positive	Negative	Positive	T1b	N0	M1	IV	Married (including common law)	Insured	No	Yes	Yes	0	Dead	23	Breast	Dead (attributable to this cancer dx)	Alive or dead due to cancer
66	White	White	Female	8500	Poorly differentiated; Grade III	HR+/HER2+ (Luminal B)	Positive	Positive	Positive	T4b	N1a	M1	IV	Married (including common law)	Insured	No	No	Yes	51	Alive	20	Alive	Alive or dead of other cause	Alive or dead due to cancer
35	White	White	Female	8500	Moderately differentiated; Grade II	HR+/HER2- (Luminal A)	Positive	Positive	Negative	T2	N1	M1	IV	Married (including common law)	Insured/No specifics	No	Yes	No	0	Alive	27	Alive	Alive or dead of other cause	Alive or dead due to cancer
47	White	White	Female	8500	Moderately differentiated; Grade II	HR-/HER2- (Triple Negative)	Negative	Negative	Negative	T1c	N0	M1	IV	Married (including common law)	Insurance status unknown	No	No	No	22	Dead	4	Breast	Dead (attributable to this cancer dx)	Alive or dead due to cancer
58	White	White	Female	8500	Poorly differentiated; Grade III	HR+/HER2- (Luminal A)	Positive	Negative	Negative	T1c	N0	M1	IV	Married (including common law)	Insured	No	No	No	0	Dead	29	Breast	Dead (attributable to this cancer dx)	Alive or dead due to cancer
54	White	White	Female	8500	Poorly differentiated; Grade III	HR+/HER2- (Luminal A)	Positive	Positive	Negative	T1c	N1a	M1	IV	Married (including common law)	Insured	No	No	No	22	Alive	28	Alive	Alive or dead of other cause	Alive or dead due to cancer
50	White	White	Female	8522	Moderately differentiated; Grade II	HR+/HER2- (Luminal A)	Positive	Positive	Negative	T2	N2b	M1	IV	Married (including common law)	Any Medicaid	No	No	No	51	Alive	28	Alive	Alive or dead of other cause	Alive or dead due to cancer
70	White	White	Female	8522	Poorly differentiated; Grade III	HR+/HER2- (Luminal A)	Positive	Positive	Negative	T2	N1a	M1	IV	Single (never married)	Insured	No	No	No	22	Alive	23	Alive	Alive or dead of other cause	Alive or dead due to cancer
62	White	White	Female	8500	Well differentiated; Grade I	HR+/HER2- (Luminal A)	Positive	Positive	Negative	T2	N1	M1	IV	Unknown	Any Medicaid	No	No	No	0	Alive	25	Alive	Alive or dead of other cause	Alive or dead due to cancer
77	Other (American Indian/AK Native, Asian/Pacific Islander)	American Indian/Alaska Native	Female	8500	Well differentiated; Grade I	HR+/HER2- (Luminal A)	Positive	Positive	Negative	T2	N0	M1	IV	Divorced	Insured	No	No	No	0	Dead	5	Nephritis, Nephrotic Syndrome and Nephrosis	Alive or dead of other cause	Dead (attributable to causes other than this cancer dx)
67	White	White	Female	8500	Moderately differentiated; Grade II	HR+/HER2- (Luminal A)	Positive	Positive	Negative	T2	N0	M1	IV	Married (including common law)	Insured	No	No	No	0	Alive	19	Alive	Alive or dead of other cause	Alive or dead due to cancer
[truncated: 5,328 more rows]
